# Supplementary material for: Palladium-catalyzed [2+1+1] annulation of norbornenes with (z)-bromostyrenes: synthesis of bismethylenecyclobutanes via twofold C(sp2)–H bond activation
Source: Royal Society of Chemistry journal article supplement (doi:10.1039/c4cc06545j), 2014-01-01
Supplement: c4cc06545j1.pdf [file c4cc06545j1.pdf]

## Supporting Information for

# **Palladium-Catalyzed [2+1+1] Annulation of Norbornenes with (Z)-Bromostyrenes: Synthesis of Bismethylenecyclobutanes *via* Twofold C(sp<sup>2</sup>)-H Bond Activation**

Jiangang Mao<sup>a,b</sup> and Weiliang Bao<sup>\*,a</sup>

<sup>a</sup> Department of Chemistry, Zhejiang University, Hangzhou 310028, Zhejiang, P. R. China

<sup>b</sup> School of Metallurgy and Chemical Engineering, Jiangxi University of Science and Technology, 86 Hongqi Avenue, Ganzhou 341000, Jiangxi, P. R. China

E-mail: wlbao@zju.edu.cn

## **Table of Contents**

|                                                                                                               |           |
|---------------------------------------------------------------------------------------------------------------|-----------|
| <b>1 General information</b>                                                                                  | <b>2</b>  |
| <b>2 Substrates Preparation</b>                                                                               | <b>2</b>  |
| 2.1 General Procedure for the Preparation of (Z)-Vinyl Bromides <sup>1</sup> :                                | 2         |
| 2.2 The Synthesis of <i>Endo</i> -Norbornenesuccinimides (2a, 2b) <sup>2</sup> :                              | 3         |
| <b>3 Pd(OAc)<sub>2</sub>-Catalyzed [2+1+1] Cycloaddition of (Z)-Vinyl Bromides and Norbornene Derivatives</b> | <b>4</b>  |
| 3.1 General Procedures for the [2+1+1] Cycloaddition                                                          | 4         |
| 3.2 Experimental Characterization of Products                                                                 | 4         |
| <b>4 References</b>                                                                                           | <b>12</b> |
| <b>5 Copies for <sup>1</sup>H NMR and <sup>13</sup>C NMR</b>                                                  | <b>12</b> |

## 1 General information

**Experimental:** All bimethylenecyclobutanation ([2+1+1] cycloaddition) reactions were carried out under an inert atmosphere of nitrogen in sealed tube. All solvents were dried by standard methods before use. All reactions were monitored by TLC with silica gel-coated plates. NMR spectra were recorded on Bruker Avance 400 (400 MHz for  $^1\text{H}$ ; 100 MHz for  $^{13}\text{C}$ ) instruments. Chemical shifts were reported in parts per million (ppm) down field from TMS with the solvent resonance as the internal standard (for  $\text{CDCl}_3$ ,  $^1\text{H}$  NMR: 7.26 ppm,  $^{13}\text{C}$  NMR: 77.16 ppm). Coupling constants ( $J$ ) were reported in Hz. Mass spectra (EI, 70 eV) were recorded on an Agilent 5975 instrument. High resolution mass spectra (HRMS) were recorded on a Waters Micromass GCT instrument. All commercially available reagents were used as received.

## 2 Substrates Preparation

### 2.1 General Procedure for the Preparation of (Z)-Vinyl Bromides<sup>1</sup>:

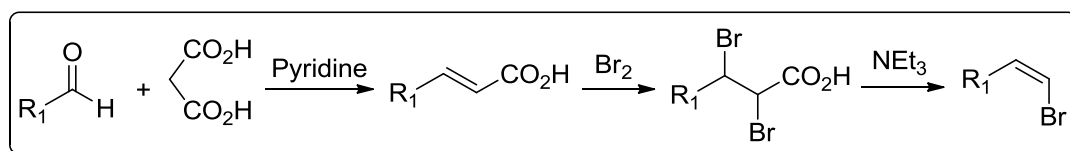

Aldehydes (50 mmol), malonic acid (50 mmol), pyridine (150 mmol), and a few drops of piperidine were added in a 50 mL three-neck flask equipped with a reflux condenser. Firstly the reaction mixture was stirred at 100 °C for 8 h and 120 °C for 2 h, then transferred to a beaker containing 10 mL concentrated hydrochloric acid and 30 mL ice water. After the mixture was cooled, the resultant precipitate was filtered, washed three times with ice water, and recrystallized with ethanol to give pure propenoic acids.

To a mixture of propenoic acids (85 mmol) and chloroform (50 mL) cooled to 0 °C, was added bromine (5.3 mL, 102mmol) dropwise and the resulting solution was stirred at this temperature for 20 min. The solution was stored in refrigerator

overnight, filtered and washed twice with cold chloroform to give the crude product 2,3-dibromopropanoic acid derivatives which was used in the next step without further purification.

Triethylamine (160 mmol, 23 mL) was added to the mixture of 2,3-dibromopropanoic acid derivatives (80 mmol) and dry DMF (40mL) at 0 °C dropwise. The solution was stirred at 0 °C for 30 min, then at room temperature for 6 h. Water (20mL) was added. The mixture was extracted with ethoxyethane (3 x 40mL). The organic layers were combined, washed with saturated potassium carbonate (2 x 40mL) and saturated sodium chloride(2 x 40mL), dried over magnesium sulfate and concentrated *in vacuo*, purified by chromatography on a column of silica gel with PE/EA=100/1 to give (z)-vinyl bromides.

## 2.2 The Synthesis of *Endo*-Norbornenesuccinimides (2a, 2b)<sup>2</sup>:

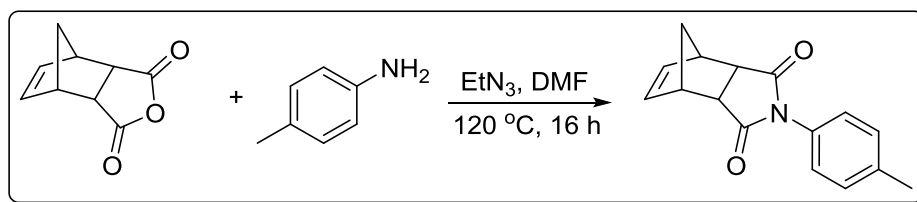

Triethylamine (6.6 mmol, 0.92 mL) and the desired anhydride (6 mmol) were added to a solution of 4-amino acid 6 (6 mmol) in 5 mL of N, N-dimethylformamide (DMF). The solution was heated for 16 h at 120 °C. After it returned to room temperature, the resulting mixture was treated with water, and extracted with ethyl ether and washed with 1 N HCl (20 mL). The combined organic layer was washed with brine, dried over magnesium sulfate and concentrated *in vacuo*, purified by chromatography on a column of silica gel with PE/EA=3/1 to afford the pure products as white solid( 86% yield). <sup>1</sup>H NMR (CDCl<sub>3</sub>, 400 MHz) δ 7.25 (d, *J* = 8.0 Hz, 2H), 7.03 (d, *J* = 8.0 Hz, 2H), 6.28 (s, 2H), 3.52 (s, 2H), 3.43-3.44 (m, 2H), 2.38 (s, 3H), 1.80 (d, *J* = 8.8 Hz, 2H), 1.62 (d, *J* = 8.8 Hz, 2H).

### 3 Pd(OAc)<sub>2</sub>-Catalyzed [2+1+1] Cycloaddition of (Z)-Vinyl Bromides and Norbornene Derivatives

#### 3.1 General Procedures for the [2+1+1] Cycloaddition

##### Synthesis of [2+1+1] Cycloaddition products 3

To a flame-dried Teflon-screw-capped tube was equipped with a magnetic stir bar, (Z)-vinyl bromides **1** (1.1 mmol, 2.2 equiv.), norbornene derivatives **2** (0.5 mmol, 1.0 equiv.), Pd(OAc)<sub>2</sub> (11.22 mg, 0.05 mmol, 10mol%), PPh<sub>3</sub> (28.85 mg, 0.11 mmol, 22 mol%), Cs<sub>2</sub>CO<sub>3</sub> (488.73 mg, 1.5 mmol, 3.0 equiv.) and toluene (2.0 mL) were added sequentially under nitrogen. The tube was sealed with a Teflon lined cap, the reaction mixture was stirred at 110 °C for 12 h. After completion of the reaction, the resulting mixture was cooled down to room temperature, diluted with CH<sub>2</sub>Cl<sub>2</sub> (10 mL), filtered through a short pad of silica gel and washed with EtOAc (30 mL). The filtrate was concentrated under vacuum and the residue was purified by silica gel column chromatography to afford the corresponding products **3**.

#### 3.2 Experimental Characterization of Products

##### (3<sup>a</sup>R,4S,4<sup>a</sup>R,5Z,6Z,6<sup>a</sup>S,7R,7<sup>a</sup>S)-5,6-dibenzylidene-2-(*p*-tolyl)octahydro-1*H*-4,7-methanocyclobuta[*f*]isoindole-1,3(2*H*)-dione

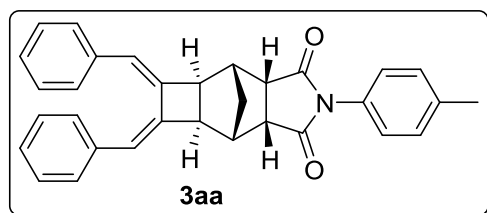

**(3aa):** The title compound was prepared according to the general procedure and purified by flash column chromatography on

silica gel with a gradient eluent of petroleum ether/EtOAc (10/1→3/1) to give white solid, 196.6 mg, 86 % yield. **Mp:** 264-266°C; **<sup>1</sup>H NMR** (400 MHz, CDCl<sub>3</sub>) δ 7.31 (d, *J* = 8.4 Hz, 2H), 7.19 (d, *J* = 8.4 Hz, 2H), 6.95 (t, *J* = 7.2 Hz, 2H), 6.75 (t, *J* = 7.6 Hz, 4H), 6.66 (d, *J* = 7.2 Hz, 4H), 6.33 (s, 2H), 3.38 (s, 2H), 3.24 (s, 2H), 3.05 (s, 2H), 2.41 (s, 3H), 2.36 (d, *J* = 11.2 Hz, 1H), 1.64 (d, *J* = 10.8 Hz, 1H); **<sup>13</sup>C NMR** (100 MHz, CDCl<sub>3</sub>) δ 176.8, 140.3, 138.8, 136.8, 129.9, 129.0, 127.9, 126.6, 126.5, 126.5, 124.8, 48.0, 43.5, 43.2, 36.0, 21.2; **HRMS (EI)** calcd. for C<sub>32</sub>H<sub>27</sub>NO<sub>2</sub> [M<sup>+</sup>]: 457.2042,

found: 457.2039.

**(3<sup>a</sup>R,4S,4<sup>a</sup>R,5Z,6Z,6<sup>a</sup>S,7R,7<sup>a</sup>S)-5,6-bis(4-methylbenzylidene)-2-(*p*-tolyl)octahydro**

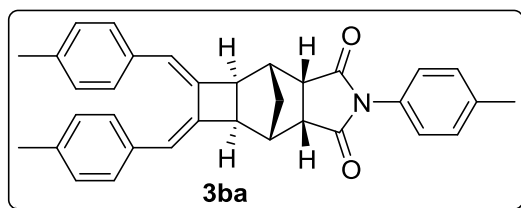

**-1*H*-4,7-methanocyclobuta[*f*]isoindole-1**

**,3(2*H*)-dione (3ba):** The title compound was prepared according to the general procedure and purified by flash column

chromatography on silica gel with a gradient eluent of petroleum ether/EtOAc (10/1 → 3/1) to give white solid, 201.4 mg, 83 % yield. **Mp:** 258-260°C; **<sup>1</sup>H NMR** (400 MHz, CDCl<sub>3</sub>) δ 7.31 (d, *J* = 7.6 Hz, 2H), 7.19 (d, *J* = 8.4 Hz, 2H), 6.55 (d, *J* = 8.4 Hz, 4H), 6.51 (d, *J* = 8.4 Hz, 4H), 6.27 (s, 2H), 3.36 (s, 2H), 3.21 (s, 2H), 3.02 (s, 2H), 2.41 (s, 3H), 2.37 (d, *J* = 10.4 Hz, 1H), 2.18 (s, 6H), 1.62 (d, *J* = 10.0 Hz, 1H); **<sup>13</sup>C NMR** (100 MHz, CDCl<sub>3</sub>) δ 176.8, 139.7, 138.7, 136.4, 134.2, 129.8, 129.2, 127.8, 127.1, 126.5, 124.4, 48.0, 43.3, 43.2, 36.0, 21.1, 21.0; **HRMS (EI)** calcd. for C<sub>34</sub>H<sub>31</sub>NO<sub>2</sub> [M<sup>+</sup>]: 485.2355, found: 485.2358. The configuration was confirmed by X-ray analysis (Figure S1) and undoubtedly determined that bismethenylcyclobutane moiety was formed.

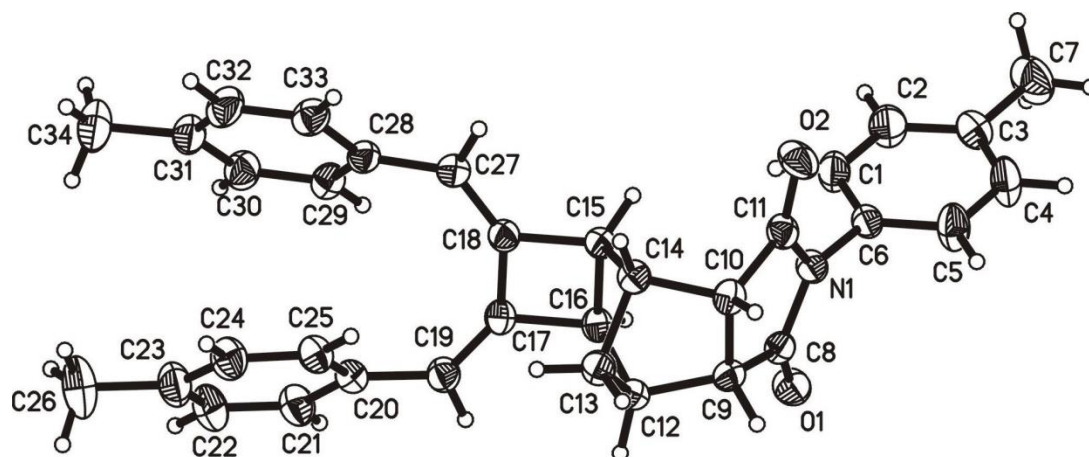

**Figure S1.** ORTEP drawing of product 3ba

**(3<sup>a</sup>R,4S,4<sup>a</sup>R,5Z,6Z,6<sup>a</sup>S,7R,7<sup>a</sup>S)-5,6-bis(3-methylbenzylidene)-2-(*p*-tolyl)octahydro**

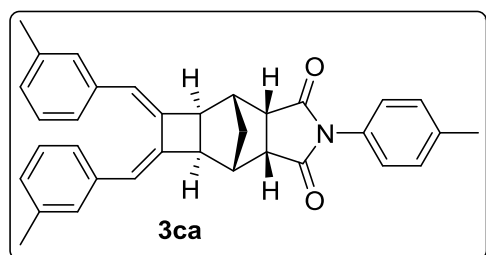

**-1*H*-4,7-methanocyclobuta[*f*]isoindole-1,3(**

**2*H*)-dione (3ca):** The title compound was prepared according to the general procedure and purified by flash column

chromatography on silica gel with a gradient eluent of petroleum ether/EtOAc (10/1 → 3/1) to give white solid, 186.8 mg, 77 % yield. **Mp:** 242-245°C; **<sup>1</sup>H NMR** (400 MHz, CDCl<sub>3</sub>) δ 7.31 (d, *J* = 8.0 Hz, 2H), 7.18 (d, *J* = 8.0 Hz, 2H), 6.80 (d, *J* = 4.4 Hz, 4H), 6.65 (s, 2H), 6.37 (s, 2H), 6.29 (s, 2H), 3.37 (s, 2H), 3.23 (s, 2H), 3.04 (s, 2H), 2.41 (s, 3H), 2.35 (d, *J* = 11.2 Hz, 1H), 1.83 (s, 6H), 1.63 (d, *J* = 10.8 Hz, 1H); **<sup>13</sup>C NMR** (100 MHz, CDCl<sub>3</sub>) δ 176.8, 140.0, 138.7, 136.7, 136.5, 129.8, 129.2, 129.1, 127.4, 126.6, 126.5, 125.3, 124.9, 48.0, 43.5, 43.2, 36.0, 21.1, 20.7; **HRMS (EI)** calcd. for C<sub>34</sub>H<sub>31</sub>NO<sub>2</sub> [M<sup>+</sup>]: 485.2355, found: 485.2354.

**(3<sup>a</sup>R,4S,4<sup>a</sup>R,5Z,6Z,6<sup>a</sup>S,7R,7<sup>a</sup>S)-5,6-bis(4-methoxybenzylidene)-2-(*p*-tolyl)octahydro-**

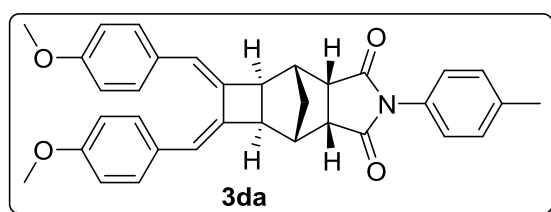

**ro-1H-4,7-methanocyclobuta[f]isoindole-1,3(2H)-dione (3da):** The title compound was prepared according to the general procedure and purified by

flash column chromatography on silica gel with a gradient eluent of petroleum ether/EtOAc (10/1 → 3/1) to give white solid, 186.2 mg, 72 % yield. **Mp:** 255-257°C; **<sup>1</sup>H NMR** (400 MHz, CDCl<sub>3</sub>) δ 7.31 (d, *J* = 8.4 Hz, 2H), 7.19 (d, *J* = 8.0 Hz, 2H), 6.55 (d, *J* = 8.8 Hz, 4H), 6.31 (d, *J* = 8.4 Hz, 4H), 6.25 (s, 2H), 3.68 (s, 6H), 3.36 (s, 2H), 3.21 (s, 2H), 3.01 (s, 2H), 2.41 (s, 3H), 2.34 (d, *J* = 10.8 Hz, 1H), 1.62 (d, *J* = 10.8 Hz, 1H); **<sup>13</sup>C NMR** (100 MHz, CDCl<sub>3</sub>) δ 176.9, 158.9, 139.0, 138.8, 129.9, 129.8, 129.1, 129.1, 126.5, 123.5, 111.8, 54.9, 48.0, 43.3, 43.1, 36.0, 21.2; **HRMS (EI)** calcd. for C<sub>34</sub>H<sub>31</sub>NO<sub>4</sub> [M<sup>+</sup>]: 517.2253, found: 517.2258.

**(3<sup>a</sup>R,4S,4<sup>a</sup>R,5Z,6Z,6<sup>a</sup>S,7R,7<sup>a</sup>S)-5,6-bis(4-chlorobenzylidene)-2-(*p*-tolyl)octahydro-**

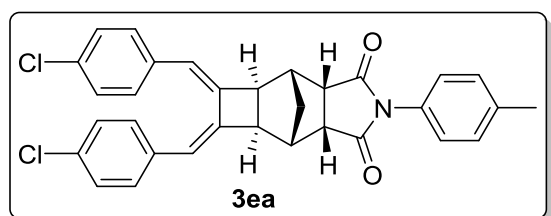

**1H-4,7-methanocyclobuta[f]isoindole-1,3(2H)-dione (3ea):** The title compound was prepared according to the general procedure and purified by flash

column chromatography on silica gel with a gradient eluent of petroleum ether/EtOAc (10/1 → 3/1) to give white solid, 246.8 mg, 94 % yield. **Mp:** 298-301°C; **<sup>1</sup>H NMR** (400 MHz, CDCl<sub>3</sub>) δ 7.31 (d, *J* = 8.0 Hz, 2H), 7.18 (d, *J* = 8.4 Hz, 2H), 6.76 (d, *J* = 8.8 Hz, 4H), 6.57 (d, *J* = 8.4 Hz, 4H), 6.26 (s, 2H), 3.37 (s, 2H), 3.22 (s, 2H), 3.03 (s,

2H), 2.41 (s, 3H), 2.30 (d,  $J = 10.8$  Hz, 1H), 1.66 (d,  $J = 10.8$  Hz, 1H);  $^{13}\text{C}$  NMR (100 MHz,  $\text{CDCl}_3$ )  $\delta$  176.7, 141.0, 138.9, 135.1, 132.9, 129.9, 129.0, 128.9, 126.8, 126.4, 123.7, 54.9, 48.0, 43.3, 43.1, 36.0, 21.2; **HRMS (EI)** calcd. for  $\text{C}_{32}\text{H}_{25}\text{Cl}_2\text{NO}_2$  [ $\text{M}^+$ ]: 525.1262, found: 525.1258.

**(3<sup>a</sup>R,4S,4<sup>a</sup>R,5Z,6Z,6<sup>a</sup>S,7R,7<sup>a</sup>S)-5,6-bis(3-chlorobenzylidene)-2-(p-tolyl)octahydro-**

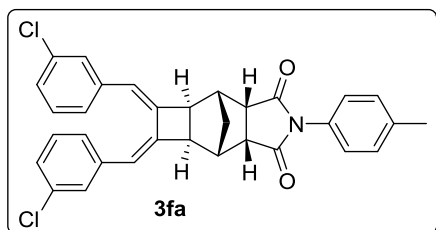

**1H-4,7-methanocyclobuta[f]isoindole-1,3(2H)-**

**dione (3fa):** The title compound was prepared according to the general procedure and purified by flash column chromatography on silica gel

with a gradient eluent of petroleum ether/EtOAc (10/1→3/1) to give white solid, 238.9 mg, 91 % yield. **Mp:** 263-265°C;  $^1\text{H}$  NMR (400 MHz,  $\text{CDCl}_3$ )  $\delta$  7.31 (d,  $J = 7.6$  Hz, 2H), 7.18 (d,  $J = 7.6$  Hz, 2H), 6.97 (d,  $J = 8.0$  Hz, 2H), 6.79 (t,  $J = 7.6$  Hz, 2H), 6.65 (d,  $J = 7.6$  Hz, 2H), 6.60 (s, 2H), 6.27 (s, 2H), 3.39 (s, 2H), 3.24 (s, 2H), 3.05 (s, 2H), 2.41 (s, 3H), 2.30 (d,  $J = 10.8$  Hz, 1H), 1.67 (d,  $J = 10.8$  Hz, 1H);  $^{13}\text{C}$  NMR (100 MHz,  $\text{CDCl}_3$ )  $\delta$  176.7, 141.4 138.9, 138.4, 133.1, 129.9, 129.0, 128.1, 127.8, 126.8, 126.4, 125.9, 123.8, 47.9, 43.5, 43.1, 36.0, 21.2; **HRMS (EI)** calcd. for  $\text{C}_{32}\text{H}_{25}\text{Cl}_2\text{NO}_2$  [ $\text{M}^+$ ]: 525.1262, found: 525.1263.

**(3<sup>a</sup>R,4S,4<sup>a</sup>R,5Z,6Z,6<sup>a</sup>S,7R,7<sup>a</sup>S)-5,6-bis(4-fluorobenzylidene)-2-(p-tolyl)octahydro-**

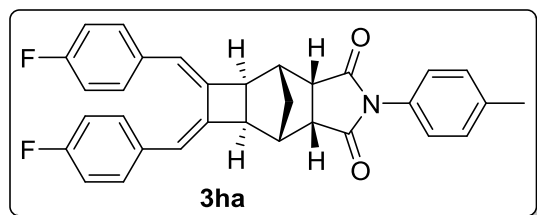

**1H-4,7-methanocyclobuta[f]isoindole-1**

**,3(2H)-dione (3ha):** The title compound was prepared according to the general procedure and purified by flash column

chromatography on silica gel with a gradient eluent of petroleum ether/EtOAc (10/1 → 3/1) to give white solid, 236.7 mg, 96 % yield. **Mp:** 297-299°C;  $^1\text{H}$  NMR (400 MHz,  $\text{CDCl}_3$ )  $\delta$  7.31 (d,  $J = 8.4$  Hz, 2H), 7.18 (d,  $J = 8.4$  Hz, 2H), 6.65 (dd,  $J_1 = 8.4$  Hz,  $J_2 = 13.6$  Hz, 4H), 6.51 (t,  $J = 8.8$  Hz, 4H), 6.26 (s, 2H), 3.38 (t,  $J = 2.8$  Hz, 2H), 3.22 (s, 2H), 3.03 (s, 2H), 2.41 (s, 3H), 2.31 (d,  $J = 10.8$  Hz, 1H), 1.66 (d,  $J = 10.8$  Hz, 1H);  $^{13}\text{C}$  NMR (100 MHz,  $\text{CDCl}_3$ )  $\delta$  176.7, 162.0 (d,  $J_{\text{C-F}} = 247.3$  Hz), 140.2, 138.9, 132.8 (d,  $J_{\text{C-F}} = 3.4$  Hz), 129.9, 129.4 (d,  $J_{\text{C-F}} = 8.9$  Hz), 129.0, 126.4, 123.5, 113.5 (d,  $J_{\text{C-F}} = 21$  Hz), 47.9, 43.4, 43.1, 36.0, 21.2; **HRMS (EI)** calcd. for  $\text{C}_{32}\text{H}_{25}\text{F}_2\text{NO}_2$  [ $\text{M}^+$ ]:

493.1853, found: 493.1852.

**(3<sup>a</sup>R,4S,4<sup>a</sup>R,6<sup>a</sup>S,7R,7<sup>a</sup>S)-5,6-bis(4-methylbenzylidene)-2-isobutyloctahydro-1H-4,**

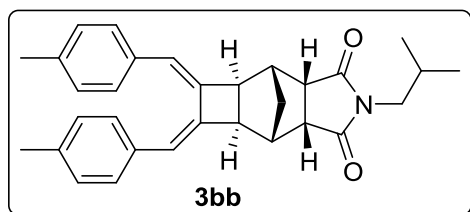

**7-methanocyclobuta[f]isoindole-1,3(2H)-dione (3bb):**

The title compound was prepared according to the general procedure and purified by flash column chromatography on

silica gel with a gradient eluent of petroleum ether/EtOAc (10/1→3/1) to give white solid, 180.5 mg, 80 % yield. **Mp:** 200-203°C; **<sup>1</sup>H NMR** (400 MHz, CDCl<sub>3</sub>) δ 6.53 (d, *J* = 8.4 Hz, 4H), 6.50 (d, *J* = 8.0 Hz, 4H), 6.24 (s, 2H), 3.34 (d, *J* = 6.0 Hz, 2H), 3.20 (s, 2H), 3.02 (s, 2H), 2.91 (s, 2H), 2.30 (d, *J* = 10.4 Hz, 1H), 2.17 (s, 6H), 2.05-2.12 (m, 1H), 1.56 (d, *J* = 10.8 Hz, 1H), 0.95 (d, *J* = 6.8 Hz, 6H); **<sup>13</sup>C NMR** (100 MHz, CDCl<sub>3</sub>) δ 178.7, 140.6, 137.1, 135.0, 128.5, 127.8, 125.0, 48.7, 46.8, 44.1, 43.3, 36.8, 27.9, 21.7, 21.1; **HRMS (EI)** calcd. for C<sub>31</sub>H<sub>33</sub>NO<sub>2</sub> [M<sup>+</sup>]: 451.2511, found: 451.2505.

**(3<sup>a</sup>R,4S,4<sup>a</sup>R,6<sup>a</sup>S,7R,7<sup>a</sup>S)-5,6-bis(4-chlorobenzylidene)-2-isobutyloctahydro-1H-4,7**

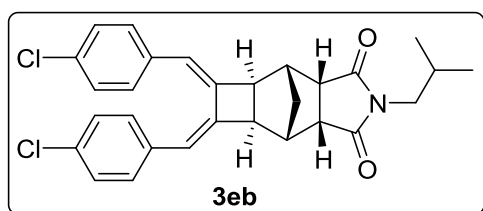

**-methanocyclobuta[f]isoindole-1,3(2H)-dione (3eb):**

The title compound was prepared according to the general procedure and purified by flash column chromatography on

silica gel with a gradient eluent of petroleum ether/EtOAc (10/1→3/1) to give light yellow solid, 221.0 mg, 90 % yield. **Mp:** 221-224°C; **<sup>1</sup>H NMR** (400 MHz, CDCl<sub>3</sub>) δ 6.75 (d, *J* = 8.4 Hz, 4H), 6.54 (d, *J* = 8.4 Hz, 4H), 6.24 (s, 2H), 3.34 (d, *J* = 6.0 Hz, 2H), 3.21 (s, 2H), 3.03 (s, 2H), 2.92 (s, 2H), 2.25 (d, *J* = 10.4 Hz, 1H), 2.04-2.11 (m, 1H), 1.60 (d, *J* = 10.4 Hz, 1H), 0.95 (d, *J* = 6.4 Hz, 6H); **<sup>13</sup>C NMR** (100 MHz, CDCl<sub>3</sub>) δ 177.7, 141.1, 135.2, 132.9, 128.9, 126.7, 123.5, 47.8, 46.1, 43.4, 42.5, 36.0, 27.1, 20.3; **HRMS (EI)** calcd. for C<sub>29</sub>H<sub>27</sub>Cl<sub>2</sub>NO<sub>2</sub> [M<sup>+</sup>]: 491.1419, found: 491.1426.

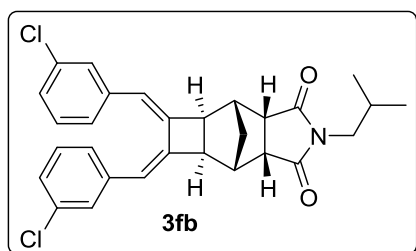

**(3<sup>a</sup>R,4S,4<sup>a</sup>R,6<sup>a</sup>S,7R,7<sup>a</sup>S)-5,6-bis(3-chlorobenzylidene)-2-isobutyloctahydro-1H-4,7-methanocyclobuta[f]isoindole-1,3(2H)-dione (3fb):** The title compound was prepared according to the general



procedure and purified by flash column chromatography on silica gel with a gradient eluent of petroleum ether/EtOAc (10/1→3/1) to give white solid, 203.8 mg, 83 % yield. **Mp:** 217-221°C; **<sup>1</sup>H NMR** (400 MHz, CDCl<sub>3</sub>) δ 6.93 (s, 2H), 6.77 (s, 2H), 6.63 (s, 2H), 6.57 (s, 2H), 6.23 (s, 2H), 3.33 (d, *J* = 4.8 Hz, 2H), 3.21 (s, 2H), 3.04 (s, 2H), 2.93 (s, 2H), 2.24 (d, *J* = 8.8 Hz, 1H), 2.06-2.08 (m, 1H), 1.56 (d, *J* = 7.6 Hz, 1H), 0.94 (d, *J* = 3.6 Hz, 6H); **<sup>13</sup>C NMR** (100 MHz, CDCl<sub>3</sub>) δ 177.8, 141.6, 138.6, 133.2, 128.2, 127.9, 126.9, 126.0, 123.8, 48.0, 46.2, 43.7, 42.6, 36.2, 27.2, 20.4; **HRMS (EI)** calcd. for C<sub>29</sub>H<sub>27</sub>Cl<sub>2</sub>NO<sub>2</sub> [M<sup>+</sup>]: 491.1419, found: 491.1424.

**(3<sup>a</sup>R,4S,4<sup>a</sup>R,6<sup>a</sup>S,7R,7<sup>a</sup>S)-5,6-bis(4-fluorobenzylidene)-2-isobutyloctahydro-1H-4,7**

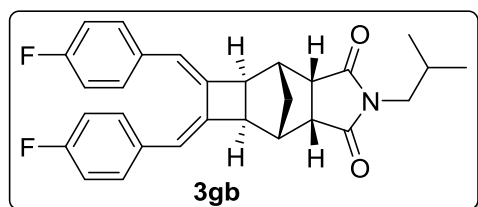

**-methanocyclobuta[f]isoindole-1,3(2H)-dio**

**ne (3gb):** The title compound was prepared according to the general procedure and purified by flash column chromatography on

silica gel with a gradient eluent of petroleum ether/EtOAc (10/1→3/1) to give white solid, 195.2 mg, 85 % yield. **Mp:** 228-232°C; **<sup>1</sup>H NMR** (400 MHz, CDCl<sub>3</sub>) δ 6.61 (t, *J* = 7.2 Hz, 4H), 6.48 (t, *J* = 8.2 Hz, 4H), 6.22 (s, 2H), 3.33 (d, *J* = 7.2 Hz, 2H), 3.20 (s, 2H), 3.02 (s, 2H), 2.91 (s, 2H), 2.25 (d, *J* = 10.8 Hz, 1H), 2.04-2.12 (m, 1H), 1.58 (d, *J* = 14.4 Hz, 1H), 0.94 (d, *J* = 14.4 Hz, 6H); **<sup>13</sup>C NMR** (100 MHz, CDCl<sub>3</sub>) δ 177.8, 162.2 (d, *J*<sub>C-F</sub> = 253.1 Hz), 140.4, 133.0 (d, *J*<sub>C-F</sub> = 3.0 Hz), 129.5 (d, *J*<sub>C-F</sub> = 7.7 Hz), 123.5, 113.6 (d, *J*<sub>C-F</sub> = 22.1 Hz), 48.0, 46.2, 43.5, 42.7, 36.1, 27.2, 20.4; **HRMS (EI)** calcd. for C<sub>29</sub>H<sub>27</sub>F<sub>2</sub>NO<sub>2</sub> [M<sup>+</sup>]: 459.2010, found: 459.2010.

**(2<sup>a</sup>R,3R,3<sup>a</sup>R,6<sup>a</sup>R,7S,7<sup>a</sup>S)-1,2-bis((Z)-benzylidene)-2,2<sup>a</sup>,3,3<sup>a</sup>,4,6<sup>a</sup>,7,7<sup>a</sup>-octahydro-1H**

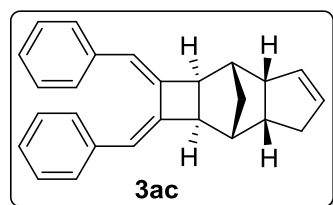

**-3,7-methanocyclobuta[f]indene (3ac):** The title compound was prepared according to the general procedure and purified by flash column chromatography on silica gel with a eluent of petroleum ether to give

white solid, 131.1 mg, 78 % yield. **Mp:** 132-135°C; **<sup>1</sup>H NMR** (400 MHz, CDCl<sub>3</sub>) δ 6.81 (t, *J* = 7.2 Hz, 2H), 6.57-6.65 (m, 8H), 6.12 (s, 2H), 5.60 (s, 1H), 5.54 (s, 1H), 3.08-3.10 (m, 1H), 2.96 (d, *J* = 5.6 Hz, 1H), 2.83 (d, *J* = 6.0 Hz, 1H), 2.58-2.63 (m, 1H), 2.41 (d, *J* = 4.0 Hz, 1H), 2.01-2.30 (m, 3H), 1.98 (d, *J* = 10.4 Hz, 1H), 1.32 (d, *J*

= 10.0 Hz, 1H);  $^{13}\text{C}$  NMR (100 MHz,  $\text{CDCl}_3$ )  $\delta$  142.7, 142.2, 136.7, 130.5, 129.9, 126.8, 126.8, 125.5, 125.0, 122.1, 121.9, 51.9, 44.1, 44.1, 42.3, 41.3, 41.1, 34.6, 30.7; **HRMS (EI)** calcd. for  $\text{C}_{26}\text{H}_{24}$  [ $\text{M}^+$ ]: 336.1878, found: 336.1874.

**(2<sup>a</sup>R,3R,3<sup>a</sup>R,6<sup>a</sup>R,7S,7<sup>a</sup>S)-1,2-bis((Z)-4-methylbenzylidene)-2,2<sup>a</sup>,3,3<sup>a</sup>,4,6<sup>a</sup>,7,7<sup>a</sup>-octahydro-1H-3,7-methanocyclobuta[f]indene (3bc):**

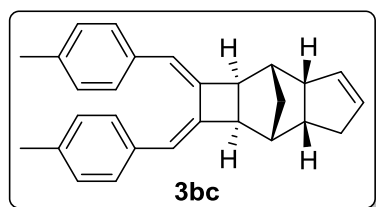

**ydro-1H-3,7-methanocyclobuta[f]indene (3bc):** The title compound was prepared according to the general procedure and purified by flash column chromatography on silica gel with a eluent of petroleum ether to give pale yellow solid, 97.8 mg, 74 % yield. **Mp:** 138-142°C;  $^1\text{H}$

**NMR** (400 MHz,  $\text{CDCl}_3$ )  $\delta$  6.43 (t,  $J$  = 15.2 Hz, 8H), 6.06 (s, 2H), 5.59 (dd,  $J$  = 5.2 Hz,  $J$  = 1.6 Hz, 1H), 5.53 (dd,  $J$  = 4.8 Hz,  $J$  = 1.6 Hz, 1H), 3.06-3.09 (m, 1H), 2.92 (d,  $J$  = 6.0 Hz, 1H), 2.80 (d,  $J$  = 6.0 Hz, 1H), 2.55-2.62 (m, 1H), 2.38 (d,  $J$  = 4.0 Hz, 1H), 2.19-2.27 (m, 3H), 2.07 (s, 6H), 1.98 (d,  $J$  = 10.0 Hz, 1H), 1.30 (d,  $J$  = 10.0 Hz, 1H);  $^{13}\text{C}$  NMR (100 MHz,  $\text{CDCl}_3$ )  $\delta$  142.1, 141.6, 134.7, 134.7, 134.0, 130.5, 129.8, 126.7, 126.7, 126.0, 121.7, 121.5, 51.9, 44.1, 44.0, 42.3, 41.2, 41.1, 34.5, 30.7, 20.0; **HRMS (EI)** calcd. for  $\text{C}_{28}\text{H}_{28}$  [ $\text{M}^+$ ]: 364.2191, found: 364.2192.

**(2<sup>a</sup>R,3R,3<sup>a</sup>R,6<sup>a</sup>R,7S,7<sup>a</sup>S)-1,2-bis((Z)-3-methylbenzylidene)-2,2<sup>a</sup>,3,3<sup>a</sup>,4,6<sup>a</sup>,7,7<sup>a</sup>-octahydro-1H-3,7-methanocyclobuta[f]indene (3cc):**

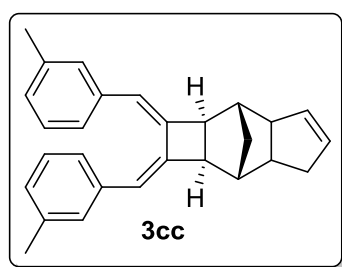

**ydro-1H-3,7-methanocyclobuta[f]indene (3cc):** The title compound was prepared according to the general procedure and purified by flash column chromatography on silica gel with a eluent of petroleum ether to give pale yellow solid, 91.2 mg, 69 % yield. **Mp:** 135-139°C;  $^1\text{H}$

**NMR** (400 MHz,  $\text{CDCl}_3$ )  $\delta$  6.65-6.72 (m, 4H), 6.56 (d,  $J$  = 7.2 Hz, 2H), 6.30 (s, 2H), 6.09 (s, 2H), 5.61 (d,  $J$  = 3.6 Hz, 1H), 5.54 (d,  $J$  = 1.6 Hz, 1H), 3.07-3.10 (m, 1H), 2.94 (d,  $J$  = 6.0 Hz, 1H), 2.82 (d,  $J$  = 4.8 Hz, 1H), 2.56-2.63 (m, 1H), 2.41 (d,  $J$  = 4.8 Hz, 1H), 2.20-2.27 (m, 3H), 1.73 (s, 6H), 1.97 (d,  $J$  = 10.4 Hz, 1H), 1.31 (d,  $J$  = 10.0 Hz, 1H);  $^{13}\text{C}$  NMR (100 MHz,  $\text{CDCl}_3$ )  $\delta$  142.5, 142.0, 136.6, 135.4, 130.5, 129.9, 128.2, 128.2, 125.8, 125.5, 124.2, 124.2, 122.2, 122.0, 51.9, 44.1, 44.1, 42.3, 41.3, 41.1, 34.5, 30.7, 19.9; **HRMS (EI)** calcd. for  $\text{C}_{28}\text{H}_{28}$  [ $\text{M}^+$ ]: 264.2191, found: 264.2197.

**(2<sup>a</sup>R,3R,3<sup>a</sup>R,6<sup>a</sup>R,7S,7<sup>a</sup>S)-1,2-bis((Z)-4-chlorobenzylidene)-2,2<sup>a</sup>,3,3<sup>a</sup>,4,6<sup>a</sup>,7,7<sup>a</sup>-octahydro-1H-3,7-methanocyclobuta[f]indene (3ec):**

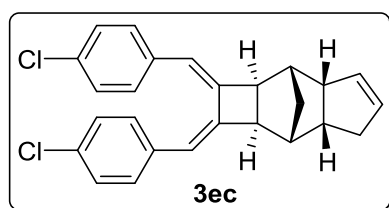

**hydro-1H-3,7-methanocyclobuta[f]indene (3ec):**

The title compound was prepared according to the general procedure and purified by flash column chromatography on silica gel with a eluent of petroleum ether to give pale yellow solid, 161.6 mg, 80 % yield. **Mp:** 174-179°C; **<sup>1</sup>H**

**NMR** (400 MHz, CDCl<sub>3</sub>) δ 6.72 (d, *J* = 8.4 Hz, 4H), 6.55 (d, *J* = 8.4 Hz, 4H), 6.12 (s, 2H), 5.67 (dd, *J* = 5.6 Hz, *J* = 1.6 Hz, 1H), 5.60 (dd, *J* = 4.8 Hz, *J* = 1.6 Hz, 1H), 3.15-3.16 (m, 1H), 3.01 (d, *J* = 6.0 Hz, 1H), 2.89 (d, *J* = 6.0 Hz, 1H), 2.63-2.70 (m, 1H), 2.47 (d, *J* = 4.0 Hz, 1H), 2.28-2.31 (m, 3H), 1.99 (d, *J* = 10.4 Hz, 1H), 1.81 (d, *J* = 10.0 Hz, 1H); **<sup>13</sup>C NMR** (100 MHz, CDCl<sub>3</sub>) δ 144.5, 144.0, 136.1, 132.3, 132.3, 131.4, 131.0, 128.9, 128.9, 126.8, 122.0, 121.8, 52.8, 45.2, 45.1, 43.3, 42.3, 42.1, 35.6, 31.7; **HRMS (EI)** calcd. for C<sub>26</sub>H<sub>22</sub>Cl<sub>2</sub> [M<sup>+</sup>]: 404.1099, found: 404.1101.

**(1R,2S,5R,6S)-3,4-bis((Z)-benzylidene)tricyclo[4.2.1.0<sup>2,5</sup>]nonane (3ad):** The title

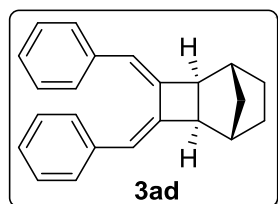

compound was prepared according to the general procedure and purified by flash column chromatography on silica gel with a eluent of petroleum ether to give pale yellow solid, 108.8 mg, 73 % yield. **Mp:** 88-92°C; **<sup>1</sup>H NMR** (400 MHz,

CDCl<sub>3</sub>) δ 6.82 (t, *J* = 6.8 Hz, 2H), 6.59-6.66 (m, 8H), 6.17 (s, 2H), 2.83 (s, 2H), 2.29 (s, 2H), 1.81 (d, *J* = 10.0 Hz, 1H), 1.49 (d, *J* = 8.4 Hz, 2H), 1.14 (d, *J* = 8.4 Hz, 2H), 1.07 (d, *J* = 10.0 Hz, 1H); **<sup>13</sup>C NMR** (100 MHz, CDCl<sub>3</sub>) δ 142.1, 136.6, 126.9, 125.5, 125.0, 122.4, 47.8, 39.6, 31.3, 27.1; **HRMS (EI)** calcd. for C<sub>23</sub>H<sub>22</sub> [M<sup>+</sup>]: 298.1722, found: 298.1725.

**(1R,2S,5R,6S)-3,4-bis((Z)-4-methylbenzylidene)tricyclo[4.2.1.0<sup>2,5</sup>]nonane (3bd):**

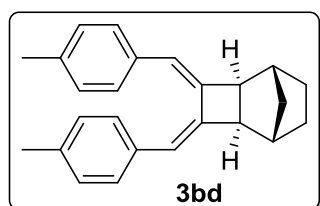

The title compound was prepared according to the general procedure and purified by flash column chromatography on silica gel with a eluent of petroleum ether to give pale yellow solid, 114.2 mg, 70 % yield. **Mp:** 102-106°C; **<sup>1</sup>H**

**NMR** (400 MHz, CDCl<sub>3</sub>) δ 6.45 (t, *J* = 8.4 Hz, 8H), 6.12 (s, 2H), 2.80 (s, 2H), 2.26 (s, 2H), 2.08 (s, 6H), 1.81 (d, *J* = 10.0 Hz, 1H), 1.48 (d, *J* = 8.4 Hz, 2H), 1.10 (dd, *J* = 7.2

Hz,  $J = 1.6$  Hz, 2H), 1.06 (d,  $J = 10.0$  Hz, 1H);  $^{13}\text{C}$  NMR (100 MHz,  $\text{CDCl}_3$ )  $\delta$  141.6, 134.8, 134.0, 126.7, 126.1, 122.0, 47.7, 39.6, 31.3, 27.1, 20.0; HRMS (EI) calcd. for  $\text{C}_{25}\text{H}_{26}$  [ $\text{M}^+$ ]: 326.2035, found: 326.2036.

**(1R,2S,5R,6S)-3,4-bis((Z)-3-methylbenzylidene)tricyclo[4.2.1.0<sup>2,5</sup>]nonane (3cd):**

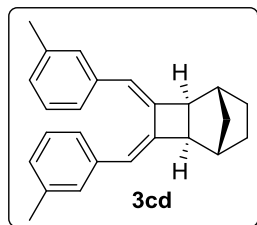

The title compound was prepared according to the general procedure and purified by flash column chromatography on silica gel with a eluent of petroleum ether to give pale yellow solid, 106.0 mg, 65 % yield. **Mp:** 95-99°C;  $^1\text{H}$  NMR (400

MHz,  $\text{CDCl}_3$ )  $\delta$  6.66-6.72 (m, 4H), 6.58 (d,  $J = 7.2$  Hz, 2H), 6.32 (s, 2H), 6.15 (s, 2H), 2.82 (s, 2H), 2.28 (s, 2H), 1.80 (d,  $J = 10.4$  Hz, 1H), 1.74 (s, 6H), 1.50 (d,  $J = 10.0$  Hz, 2H), 1.14 (dd,  $J = 7.2$  Hz,  $J = 1.6$  Hz, 2H), 1.07 (d,  $J = 10.4$  Hz, 1H);  $^{13}\text{C}$  NMR (100 MHz,  $\text{CDCl}_3$ )  $\delta$  141.9, 136.5, 135.4, 128.3, 125.9, 125.6, 124.3, 122.5, 47.8, 39.6, 31.3, 27.1, 19.9; HRMS (EI) calcd. for  $\text{C}_{25}\text{H}_{26}$  [ $\text{M}^+$ ]: 326.2035, found: 326.2032.

#### 4 References

- (1) (a) Sun, M.-M.; Wu, H.-D.; Zheng, J.-N.; Bao, W.-L. *Adv. Synth. Catal.* **2012**, *354*, 835. (b) Kuang, C.; Senboku, H.; Tokuda, M. *Tetrahedron Lett.* **2001**, *42*, 3893.
- (2) Lanier, M.; Schade, D.; Willems, E.; Tsuda, M.; Spiering, S.; Kalisiak, J.; Mercola, M.; Cashman, J. R. *J. Med. Chem.* **2012**, *55*, 697.
- (3) Goll, J. M.; Fillion, E. *Organometallics.* **2008**, *27*, 3622.
- (4) (a) Stille, J. R.; Santarsiero, B. D.; Grubbs, R. H. *J. Org. Chem.* **1990**, *55*, 843. (a) Wilson, G. O.; Caruso, M. M.; Schelkopf, S. R.; Sottos, N. R.; White, S. R.; Moore, J. S. *Appl. Mater. Interfaces.* **2011**, *3*, 3072.

#### 5 Copies for $^1\text{H}$ NMR and $^{13}\text{C}$ NMR

7.292  
7.262  
7.242  
7.045  
7.025

6.281

3.519  
3.441  
3.436  
3.434  
3.430

2.381

1.811  
1.789  
1.636  
1.614

0.031

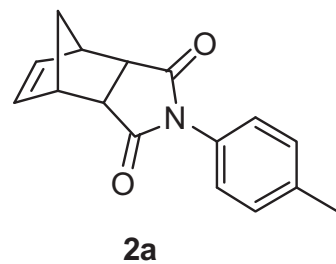

2.05 2.00

2.01

2.01 2.03

3.08

1.03 1.02

8

7

6

5

4

3

2

1

PPM

USER: root -- DATE: May 19 16:32:45 2012 (UT+8h) nmr@NMR

F1: 400.130

F2: 1.000

SW1: 11990

OF1: 3604.3

PTS1d: 32768

EX: zg30

PW: 12.5 usec

PD: 1.5 sec

NA: 8

LB: 0.3

Nuts - \$mjpg0114201(刚性烯炔原料2)\_73877.1

7.326  
7.305  
7.276  
7.203  
7.182  
6.970  
6.952  
6.934  
6.764  
6.745  
6.727  
6.671  
6.653  
6.330

3.379  
3.244  
3.047

2.410  
2.372  
2.344

1.658  
1.631  
1.588

0.019

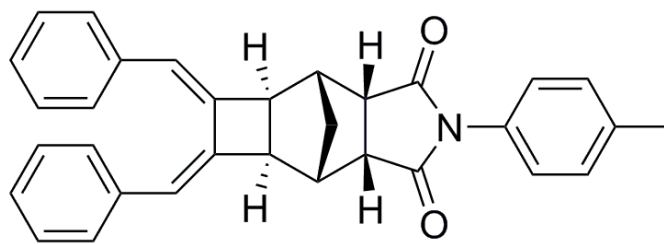

2.08  
2.05  
2.07  
4.06  
4.09  
2.00

2.06  
2.02  
2.03

3.03  
1.15

1.01

8

7

6

5

4

3

2

1

PPM

USER: root -- DATE: May 23 14:56:23 2012 (UT+8h) nmr@NMR

F1: 400.130

F2: 1.000

SW1: 11990

OF1: 3598.3

PTS1d: 32768

EX: zg30

PW: 12.5 usec

PD: 1.5 sec

NA: 8

LB: 0.3

Nuts - \$mjpg0114501\_74148.1

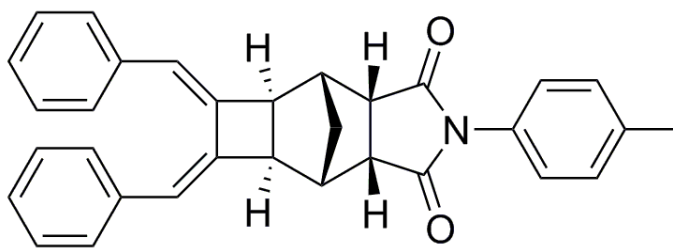

**3aa**

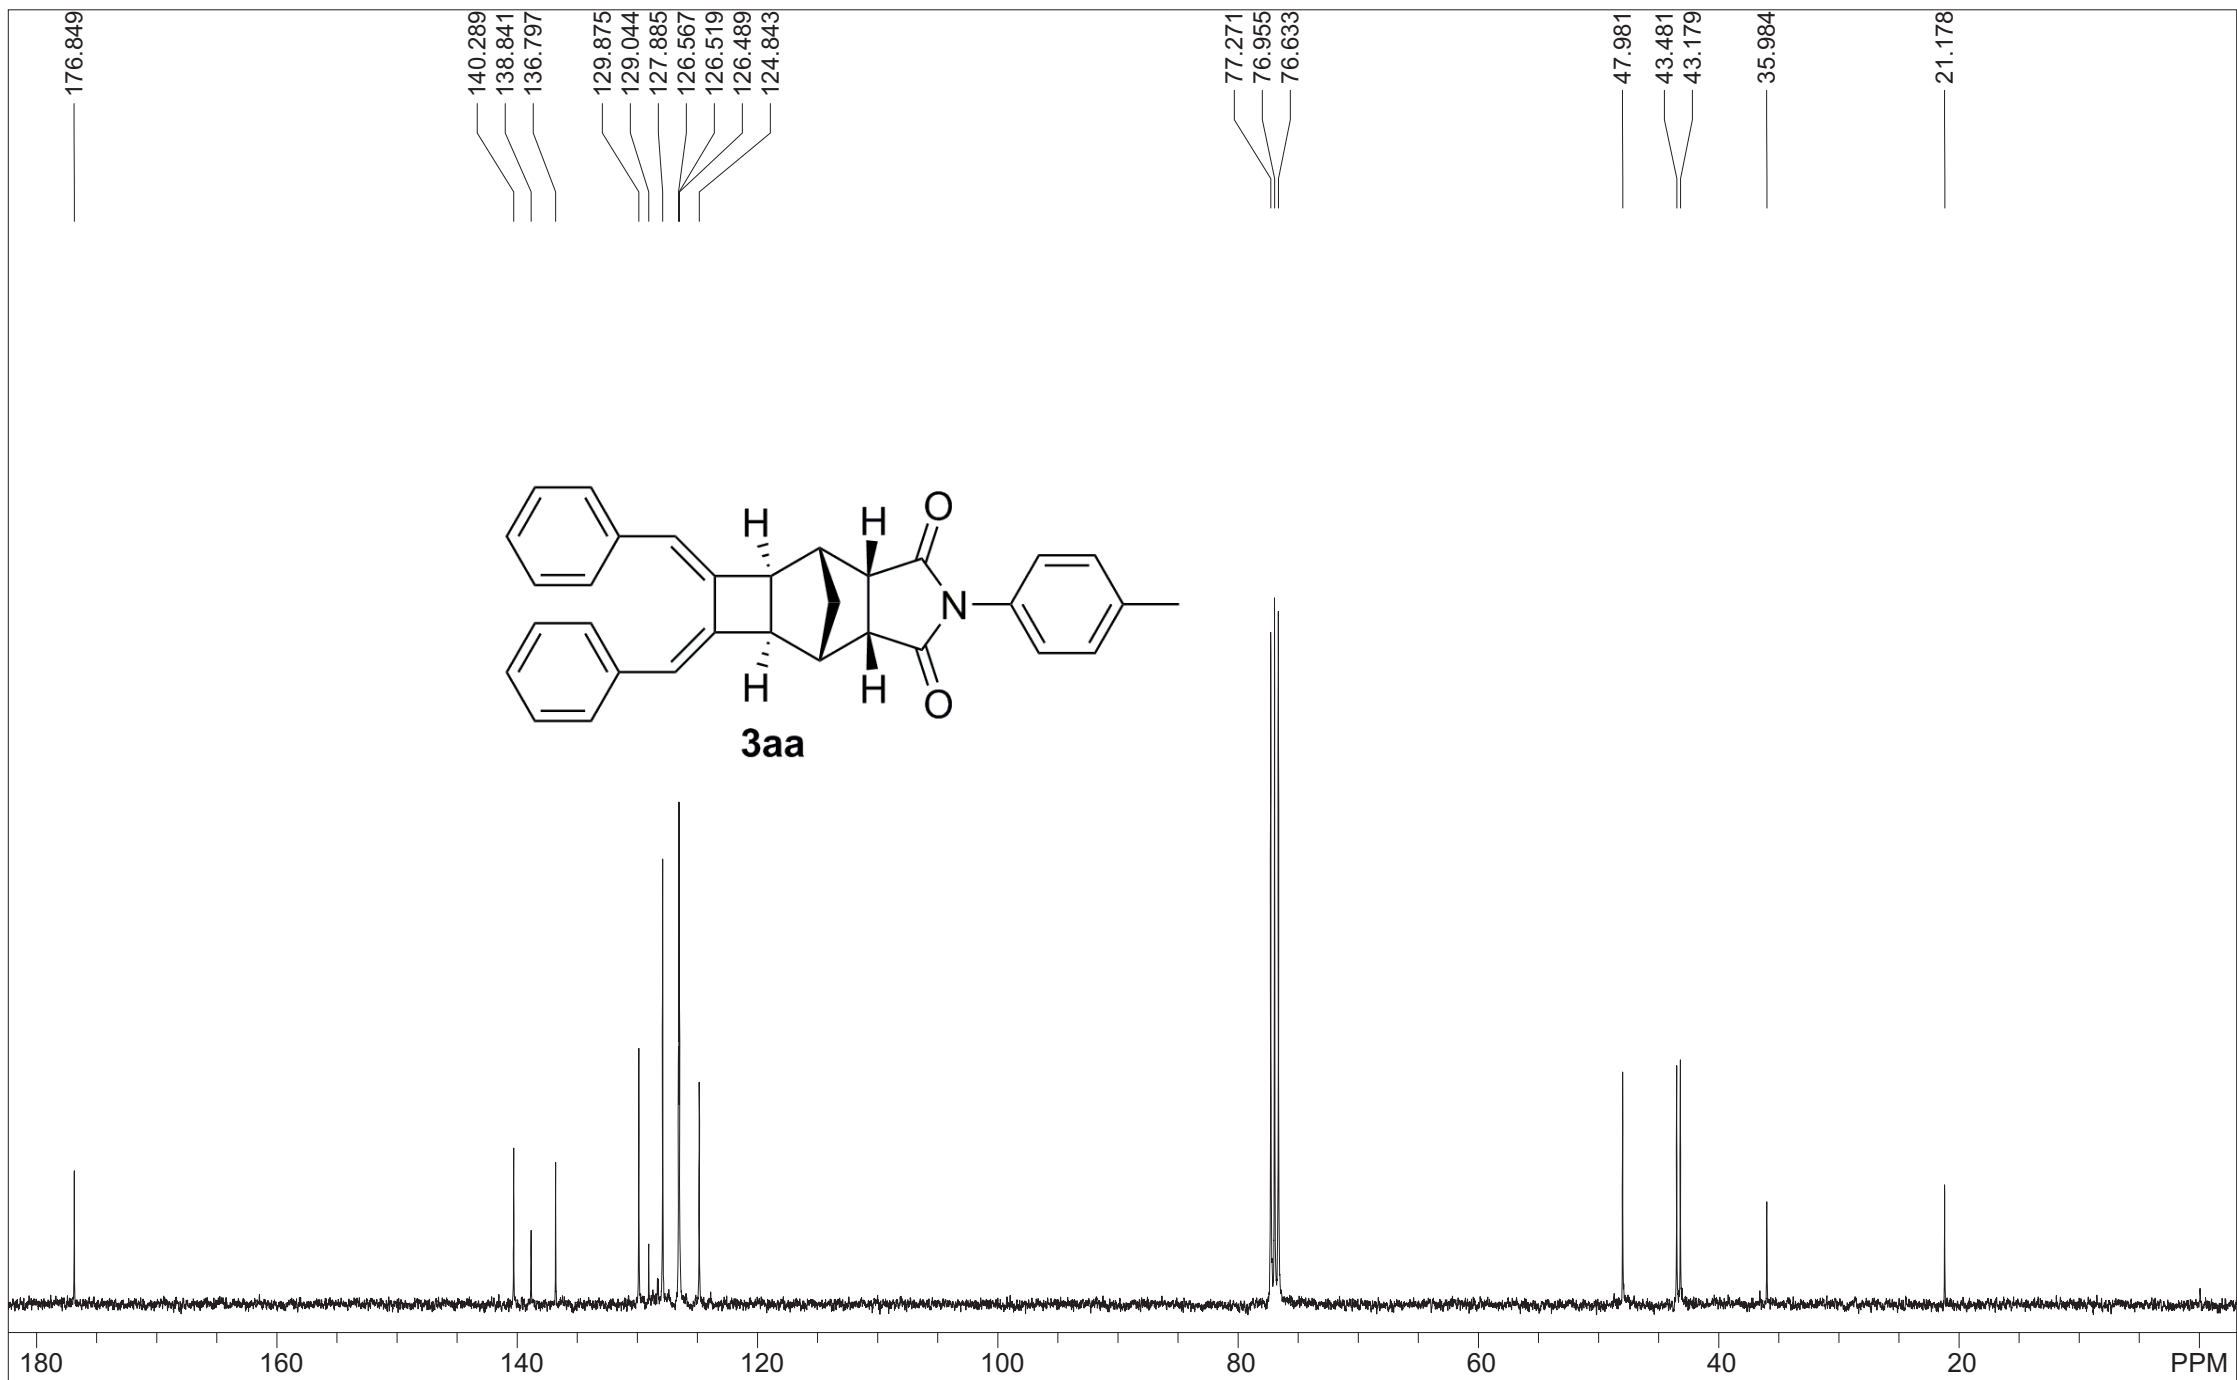

USER: root -- DATE: May 30 19:12:16 2012 (UT+8h) nmr@NMR

|             |              |             |              |              |
|-------------|--------------|-------------|--------------|--------------|
| F1: 100.613 | F2: 1.000    | SW1: 25126  | OF1: 11056.6 | PTS1d: 32768 |
| EX: zgdc30  | PW: 7.5 usec | PD: 1.0 sec | NA: 501      | LB: 2.0      |

Nuts - \$mjpg0114501-C\_20591.1

7.318  
7.299  
7.196  
7.175

6.558  
6.537  
6.523  
6.502  
6.270

3.363  
3.209  
3.019

2.405  
2.369  
2.358  
2.182

1.636  
1.610

0.017

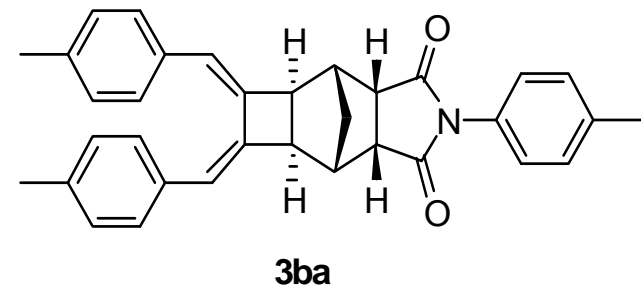

2.03  
2.05

4.08  
4.04  
2.00

2.02  
2.08  
2.01

3.10  
0.99  
6.12

0.94

8 7 6 5 4 3 2 1 PPM

USER: root -- DATE: Oct 8 13:49:25 2012 (UT+8h) nmr@NMR

|             |               |             |             |                              |
|-------------|---------------|-------------|-------------|------------------------------|
| F1: 400.130 | F2: 1.000     | SW1: 11990  | OF1: 3591.1 | PTS1d: 32768                 |
| EX: zg30    | PW: 12.5 usec | PD: 1.5 sec | NA: 8       | LB: 0.3                      |
|             |               |             |             | Nuts - \$mjpg0120202_81680.1 |



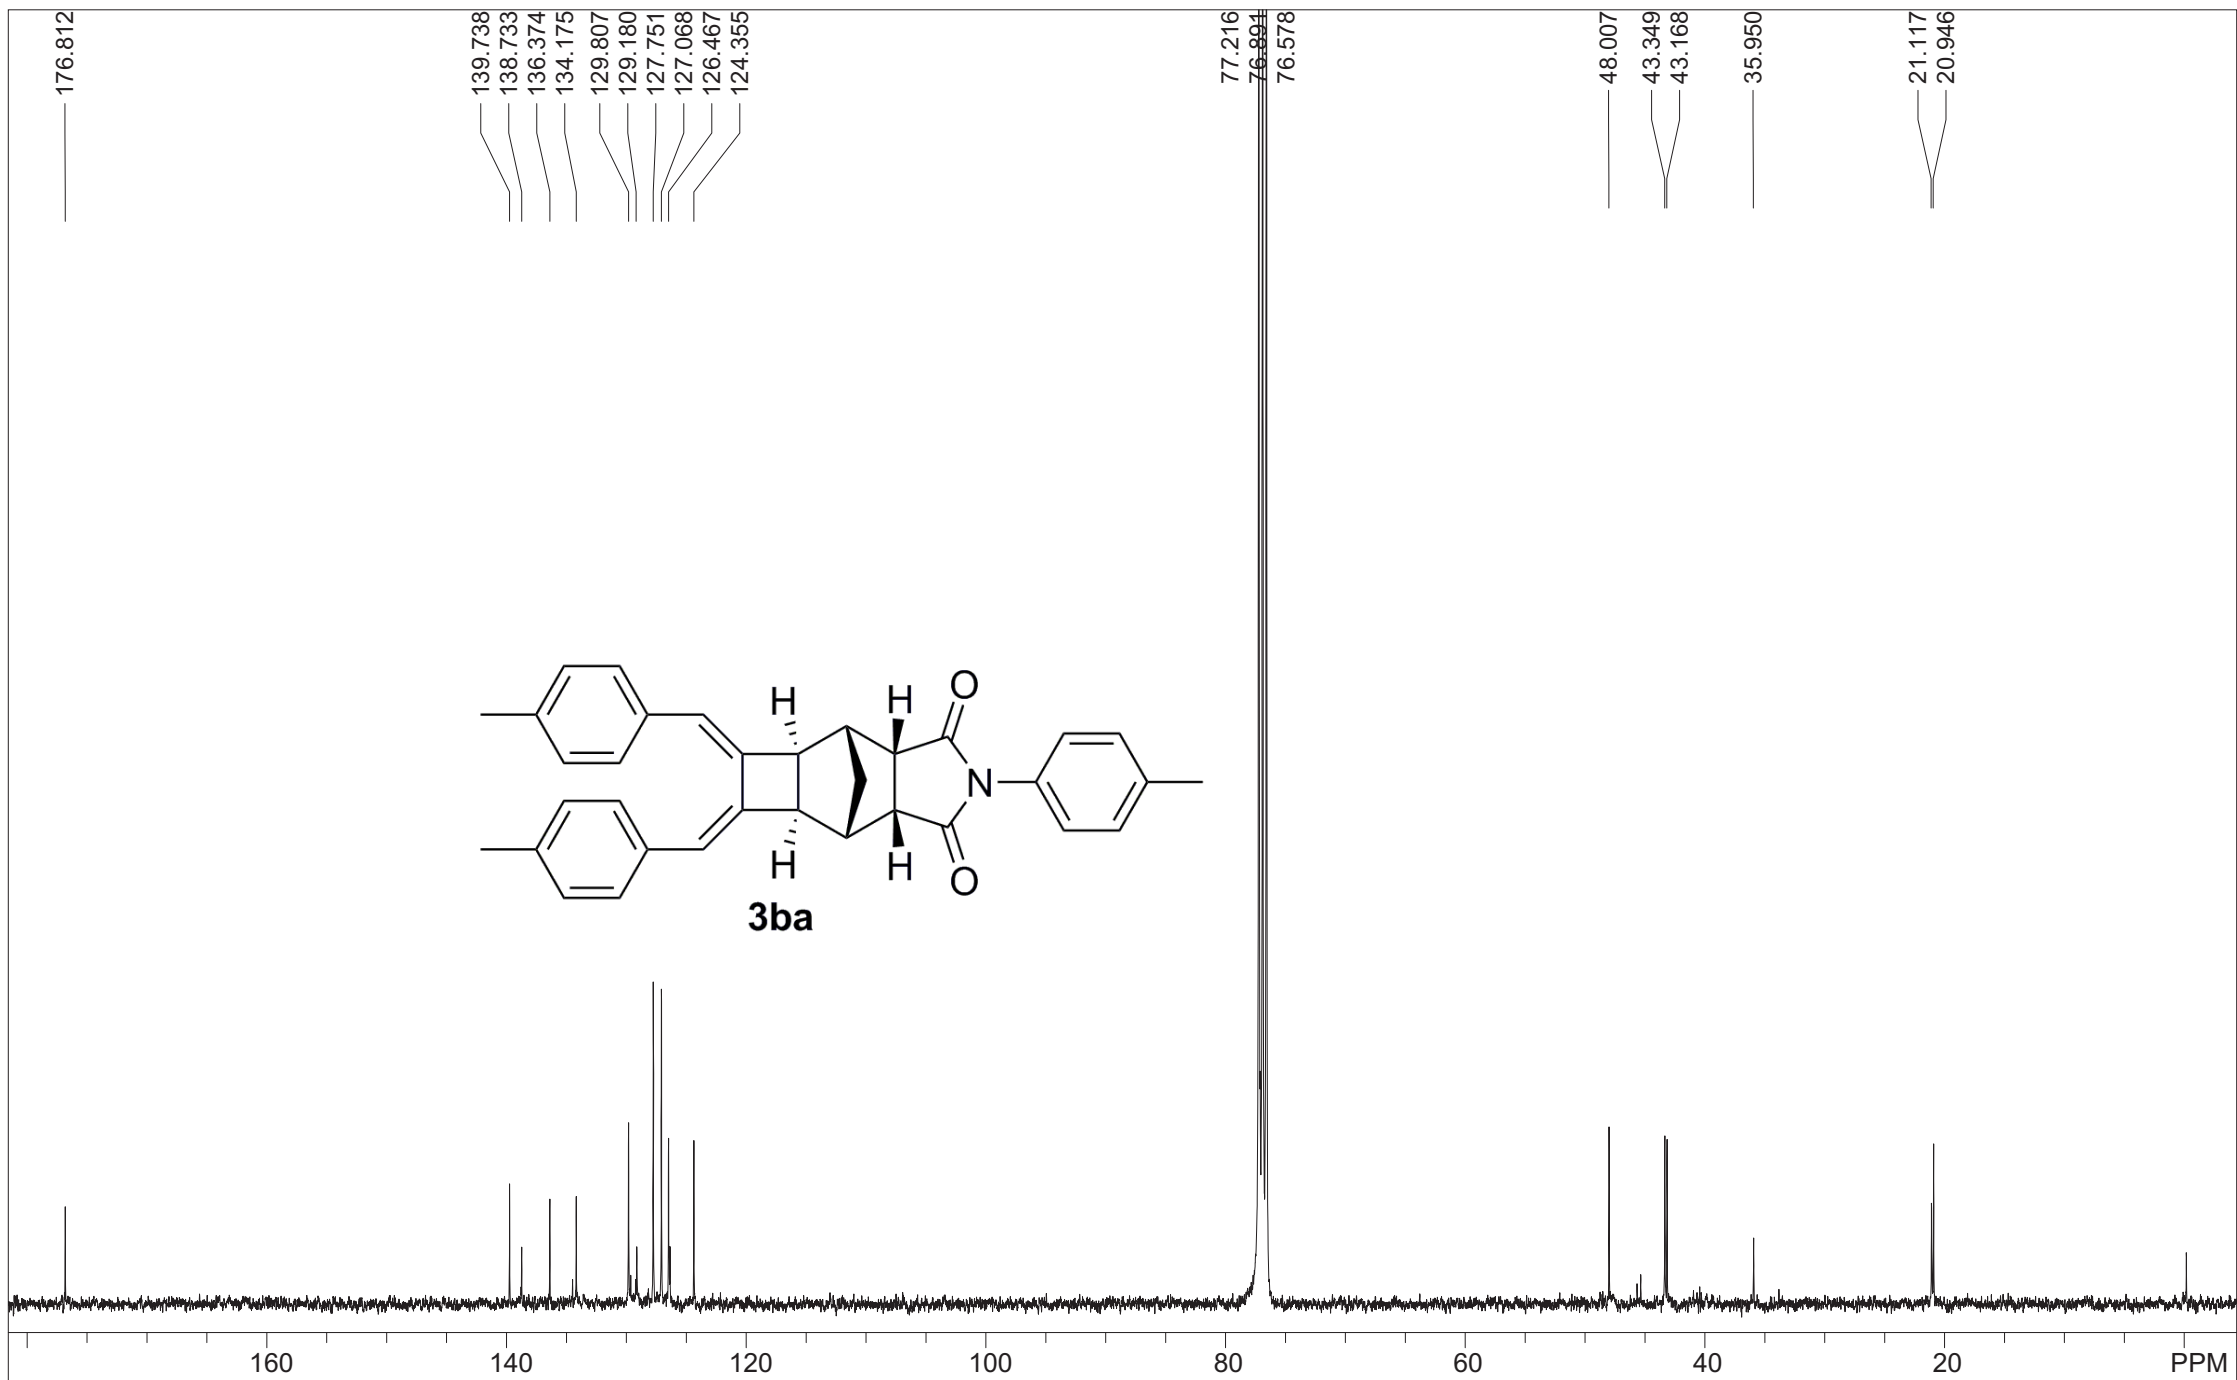

USER: root -- DATE: Oct 11 10:05:17 2012 (UT+8h) nmr@NMR

|             |              |             |              |              |
|-------------|--------------|-------------|--------------|--------------|
| F1: 100.613 | F2: 1.000    | SW1: 25126  | OF1: 11056.6 | PTS1d: 32768 |
| EX: zgdc30  | PW: 7.5 usec | PD: 1.0 sec | NA: 8192     | LB: 2.0      |

Nuts - \$mjpg0120202-C\_21419.1

7.320  
7.300  
7.275  
7.193  
7.173  
6.804  
6.793  
6.654  
6.371  
6.294

3.374  
3.227  
3.036

2.406  
2.360  
2.332

1.832  
1.644  
1.617  
1.580

0.015

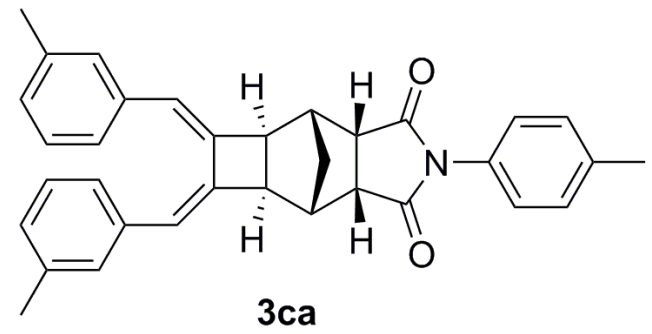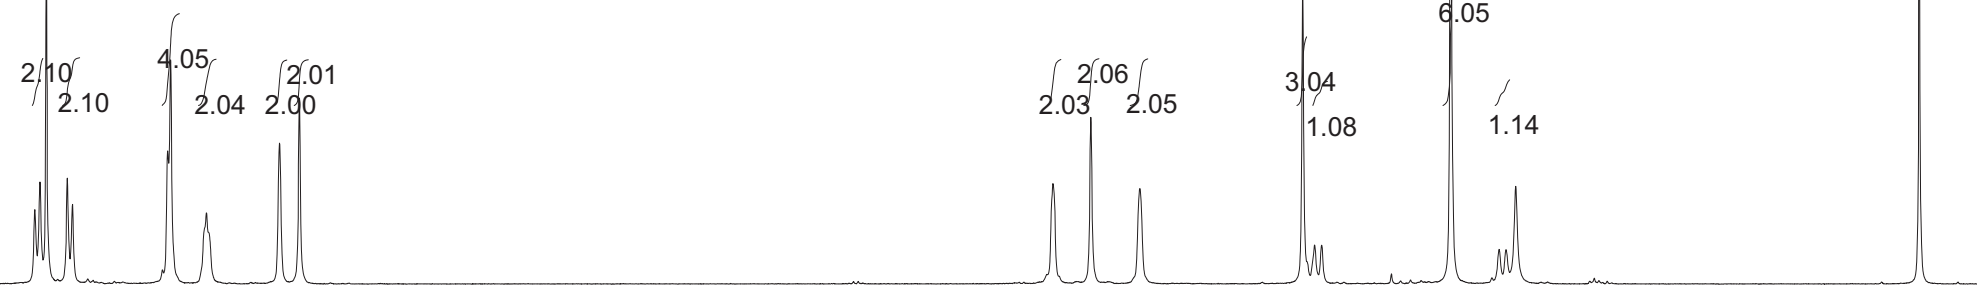

8 7 6 5 4 3 2 1 0 PPM

USER: root -- DATE: Jun 12 20:32:26 2012 (UT+8h) nmr@NMR

|             |               |             |             |                               |
|-------------|---------------|-------------|-------------|-------------------------------|
| F1: 400.130 | F2: 1.000     | SW1: 11990  | OF1: 3597.6 | PTS1d: 32768                  |
| EX: zg30    | PW: 12.5 usec | PD: 1.5 sec | NA: 8       | LB: 0.3                       |
|             |               |             |             | Nuts - \$mjb0114901-2_75839.1 |

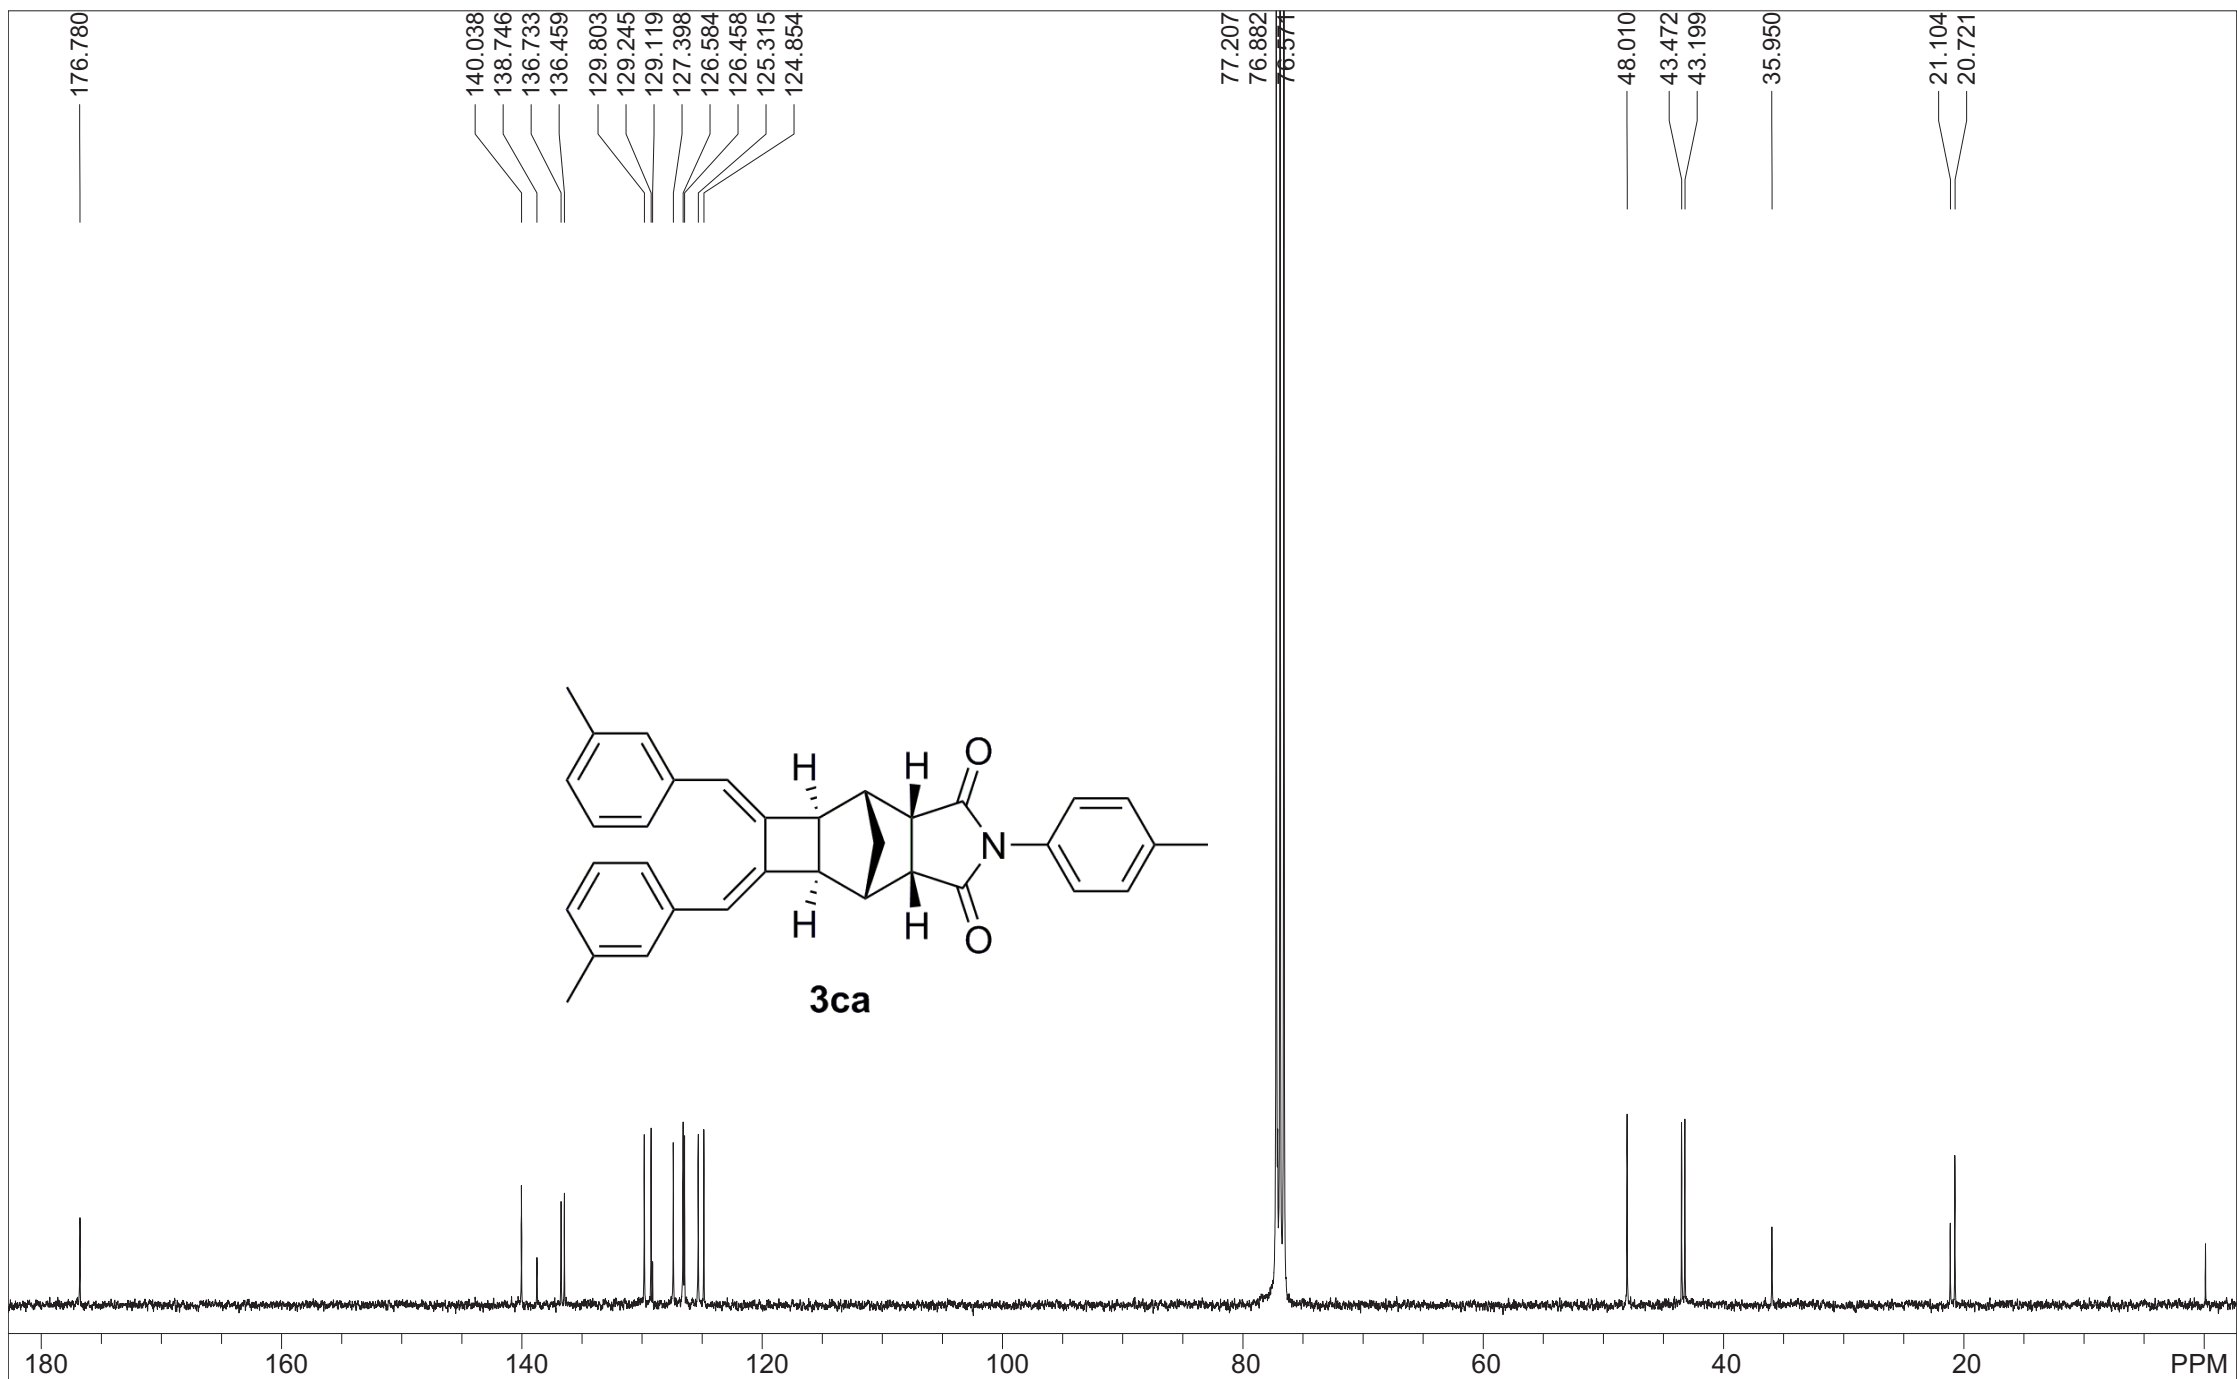

USER: root -- DATE: Jun 15 10:42:40 2012 (UT+8h) nmr@NMR

|             |              |             |              |              |
|-------------|--------------|-------------|--------------|--------------|
| F1: 100.613 | F2: 1.000    | SW1: 25126  | OF1: 11056.6 | PTS1d: 32768 |
| EX: zgdc30  | PW: 7.5 usec | PD: 1.0 sec | NA: 5120     | LB: 2.0      |

Nuts - \$mjq0114901-2-C\_20722.1

7.321  
7.300  
7.277  
7.197  
7.177

6.557  
6.535  
6.316  
6.295  
6.250

3.675  
3.363  
3.208  
3.013

2.406

0.018

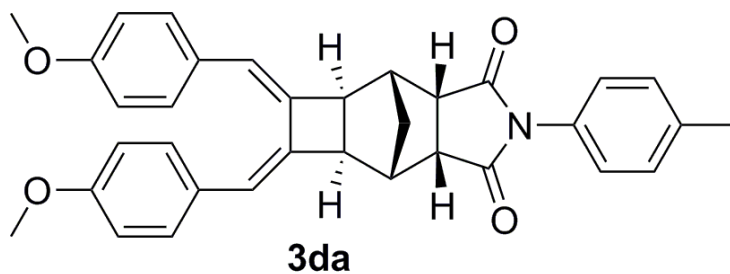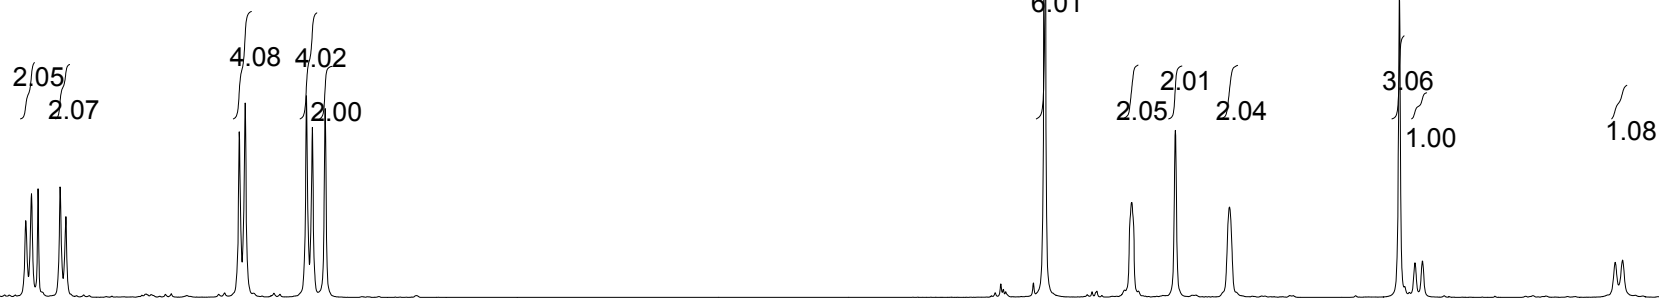

USER: root -- DATE: Nov 8 12:58:55 2012 (UT+8h) nmr@NMR

|             |               |             |             |                              |
|-------------|---------------|-------------|-------------|------------------------------|
| F1: 400.130 | F2: 1.000     | SW1: 11990  | OF1: 3598.3 | PTS1d: 32768                 |
| EX: zg30    | PW: 12.5 usec | PD: 1.5 sec | NA: 16      | LB: 0.3                      |
|             |               |             |             | Nuts - \$mjpg0123301_84352.1 |

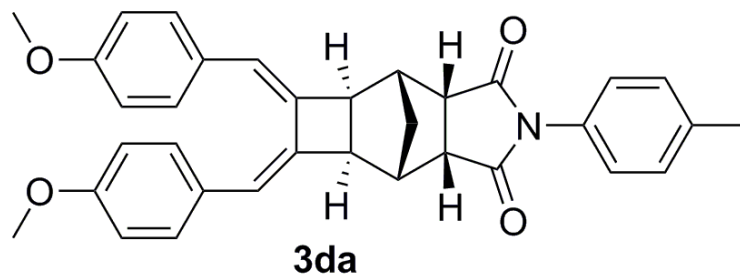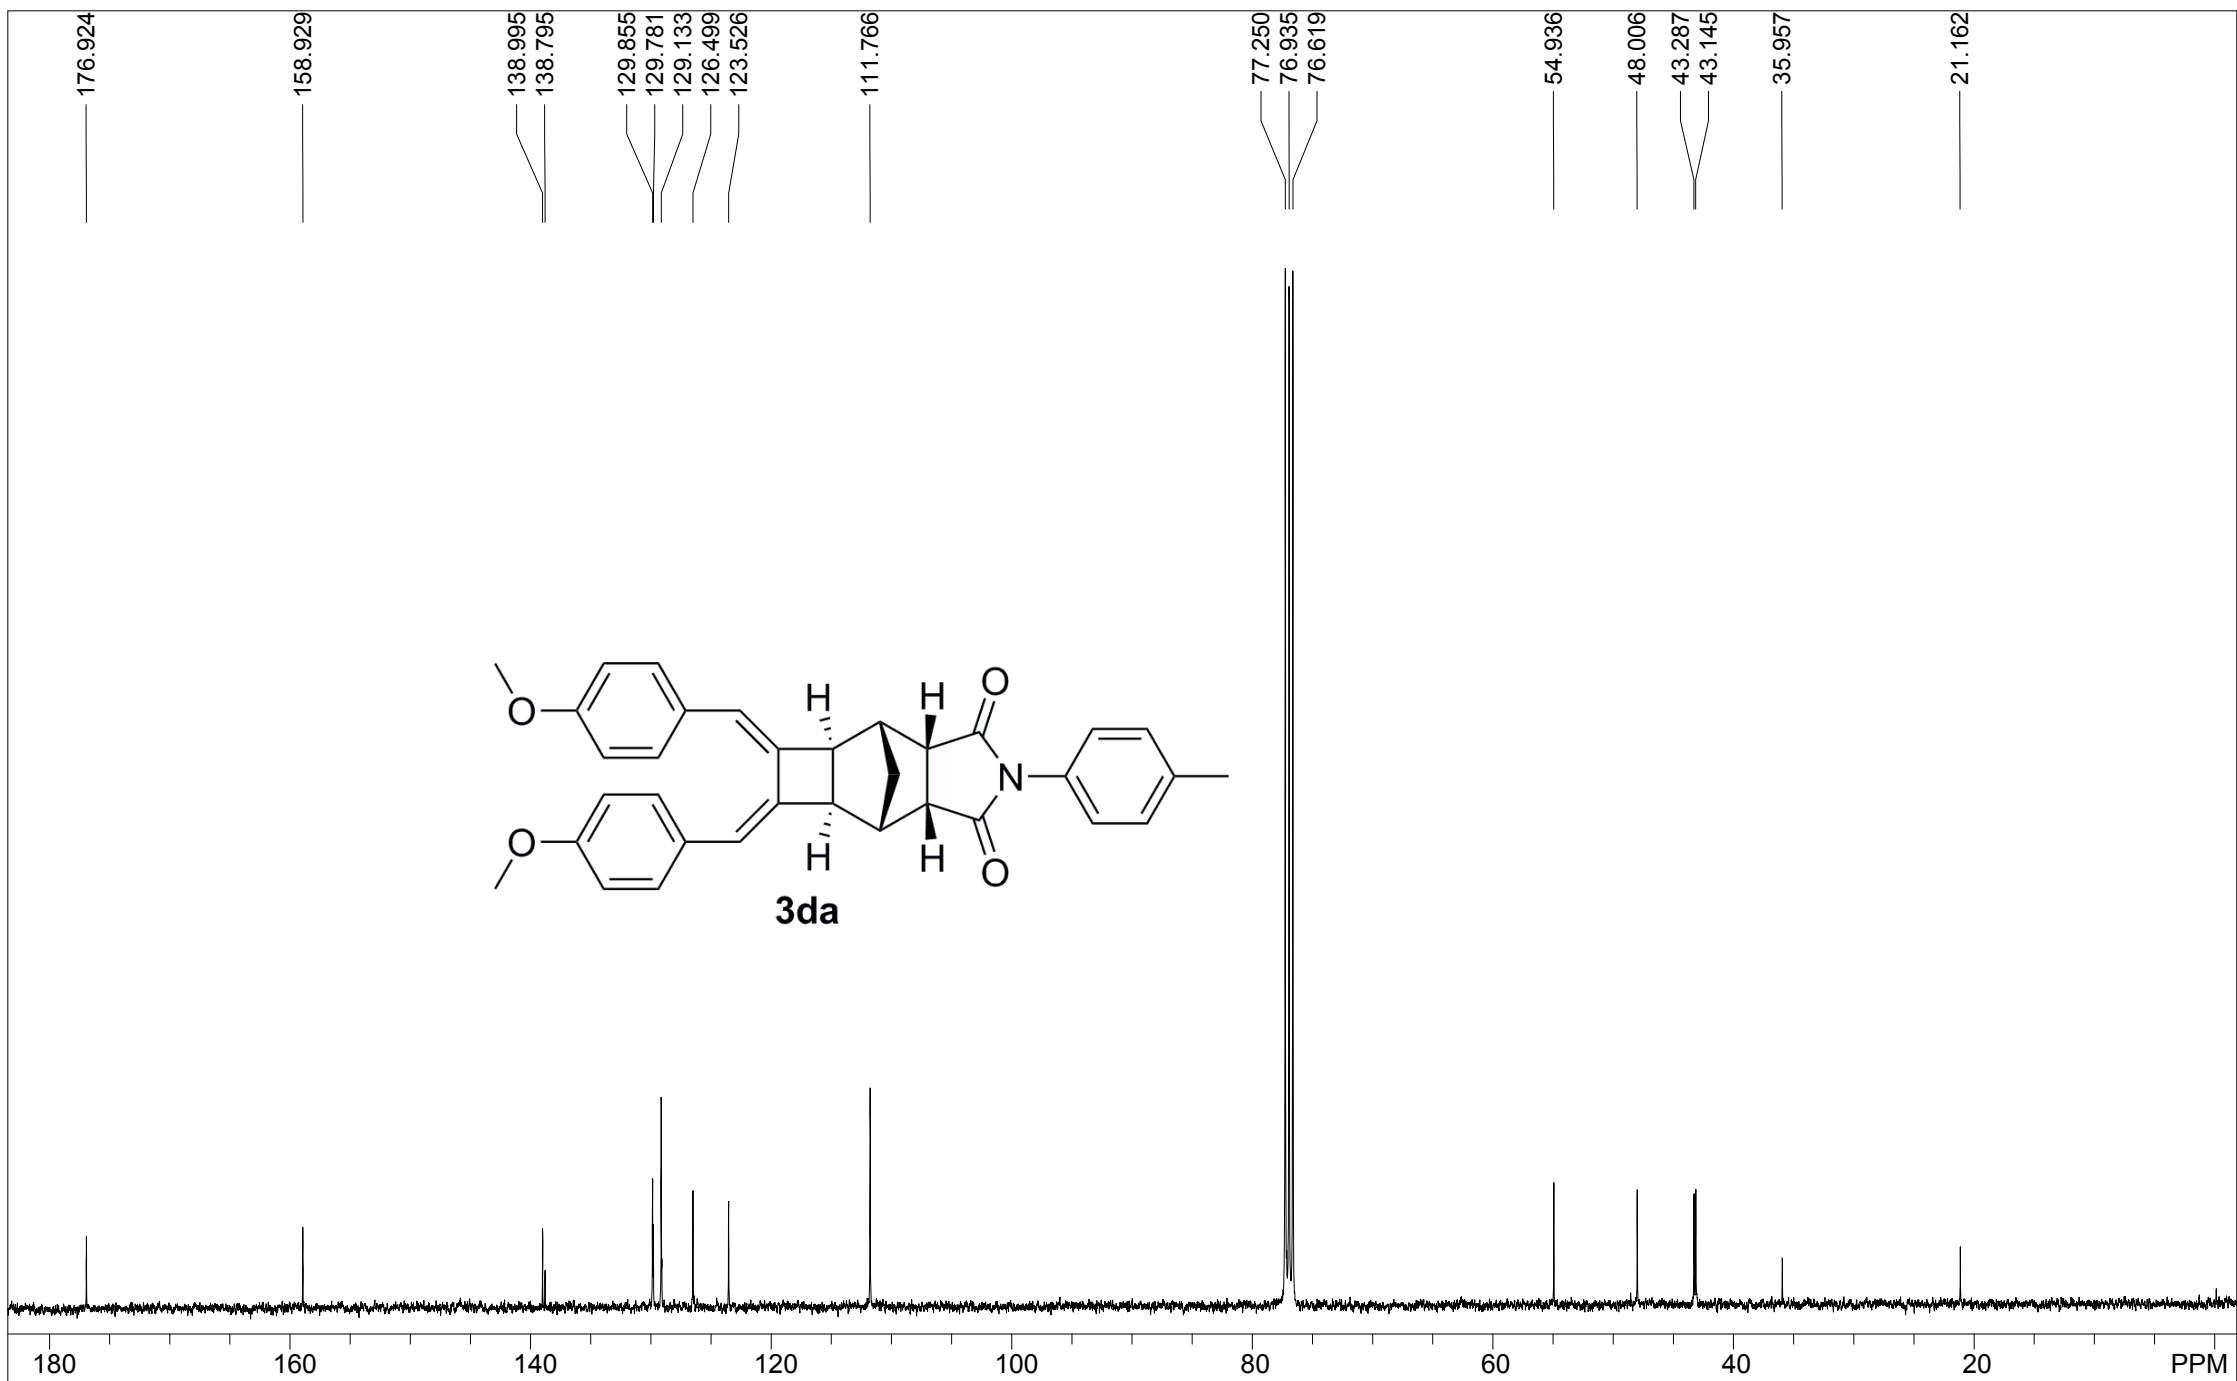

USER: root -- DATE: Nov 8 17:57:24 2012 (UT+8h) nmr@NMR

|             |              |             |              |              |
|-------------|--------------|-------------|--------------|--------------|
| F1: 100.613 | F2: 1.000    | SW1: 25126  | OF1: 11056.6 | PTS1d: 32768 |
| EX: zgdc30  | PW: 7.5 usec | PD: 1.0 sec | NA: 822      | LB: 2.0      |

Nuts - \$mjpg0123301-C 21626.1

7.318  
7.298  
7.275  
7.188  
7.167

6.774  
6.752  
6.576  
6.555

6.261

3.373  
3.218  
3.031

2.406  
2.313  
2.286  
2.060

1.673  
1.646  
1.597

1.273

0.016

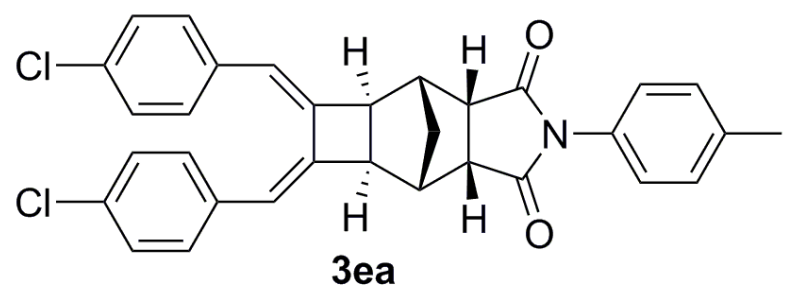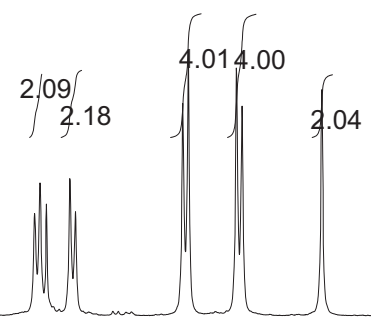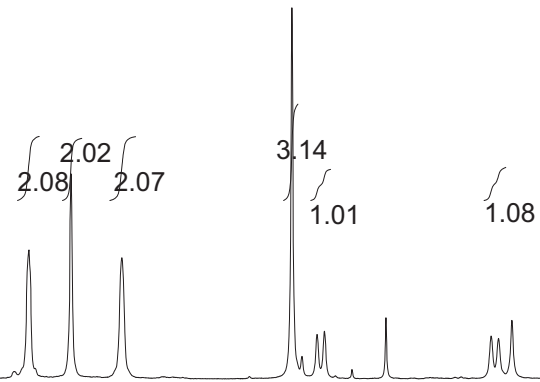

8 7 6 5 4 3 2 1 PPM

USER: root -- DATE: Sep 27 15:41:47 2012 (UT+8h) nmr@NMR

|                              |               |             |             |              |
|------------------------------|---------------|-------------|-------------|--------------|
| F1: 400.130                  | F2: 1.000     | SW1: 11990  | OF1: 3597.6 | PTS1d: 32768 |
| EX: zg30                     | PW: 12.5 usec | PD: 1.5 sec | NA: 8       | LB: 0.3      |
| Nuts - \$mjpg0119801_81195.1 |               |             |             |              |

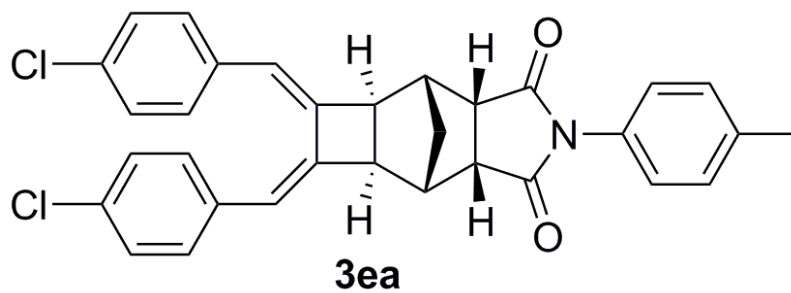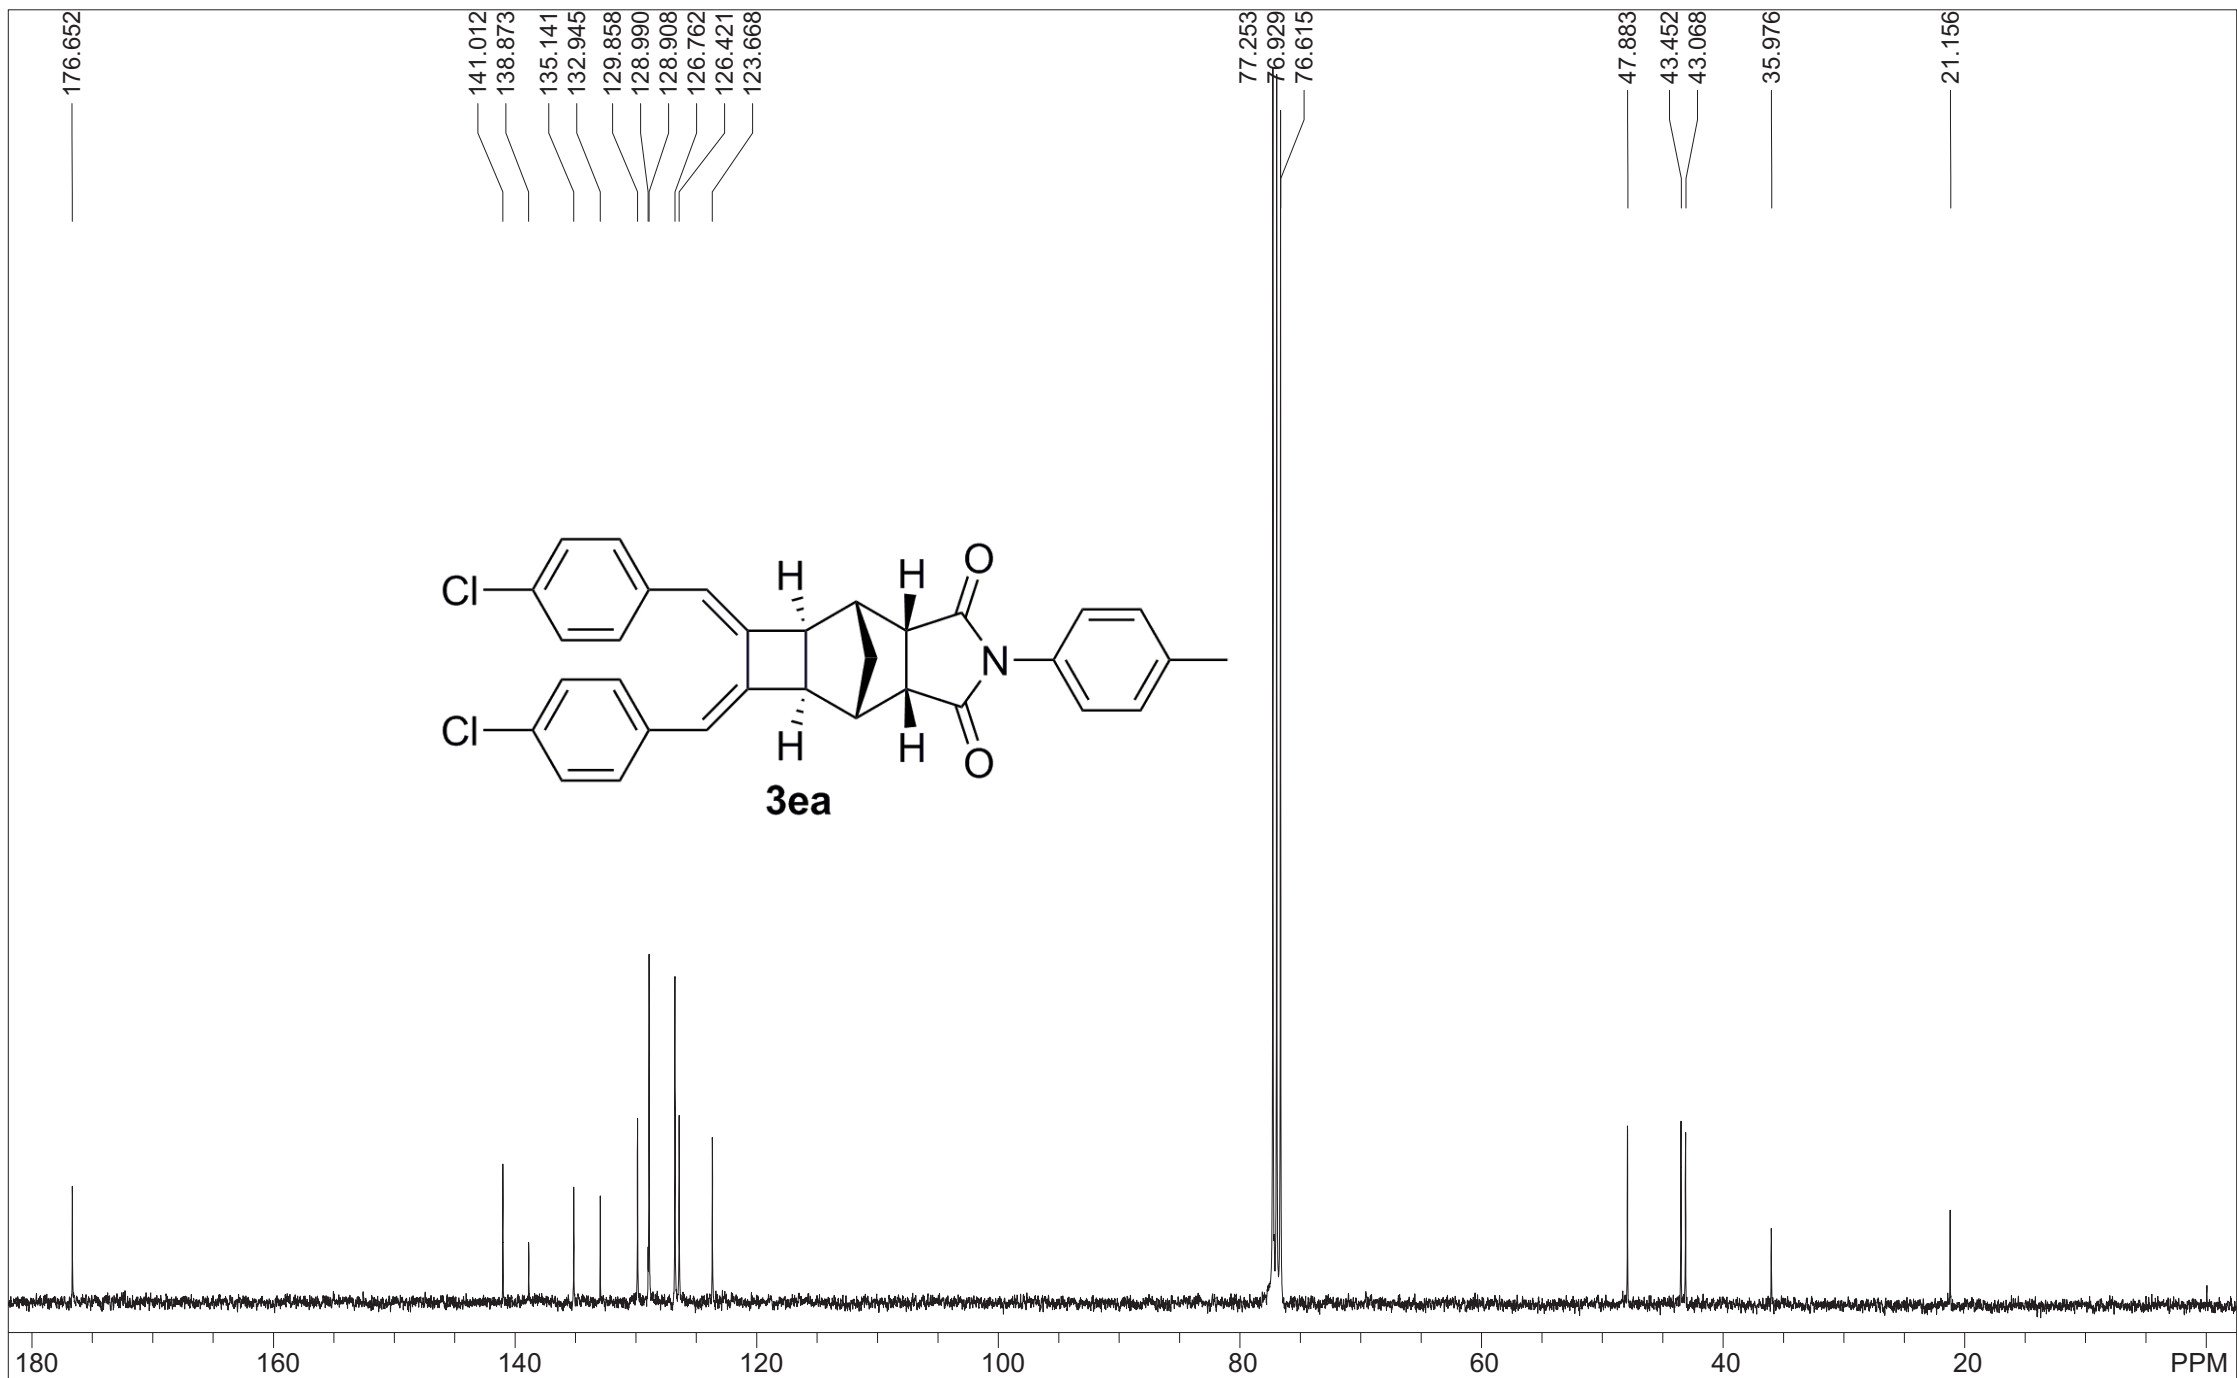

USER: root -- DATE: Sep 28 12:52:08 2012 (UT+8h) nmr@NMR

|             |              |             |              |              |
|-------------|--------------|-------------|--------------|--------------|
| F1: 100.613 | F2: 1.000    | SW1: 25126  | OF1: 11056.6 | PTS1d: 32768 |
| EX: zgdc30  | PW: 7.5 usec | PD: 1.0 sec | NA: 743      | LB: 2.0      |

Nuts - \$mjpg0119801-C\_21340.1

7.322  
7.303  
7.273  
7.186  
7.167  
6.975  
6.955  
6.812  
6.793  
6.774  
6.661  
6.642  
6.603  
6.269

3.386  
3.236  
3.049

2.408  
2.316  
2.289

1.688  
1.661  
1.592

0.012

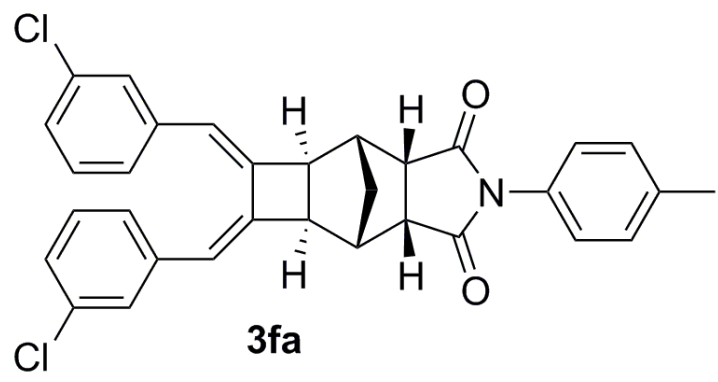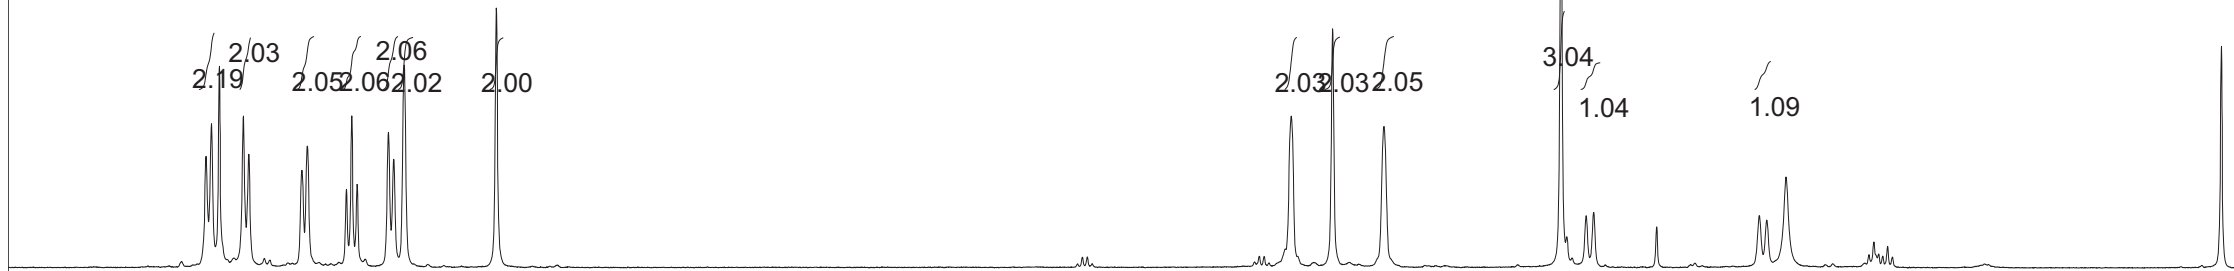

8 7 6 5 4 3 2 1 PPM

USER: root -- DATE: May 31 21:16:33 2012 (UT+8h) nmr@NMR

|                              |               |             |             |              |
|------------------------------|---------------|-------------|-------------|--------------|
| F1: 400.130                  | F2: 1.000     | SW1: 11990  | OF1: 3597.6 | PTS1d: 32768 |
| EX: zg30                     | PW: 12.5 usec | PD: 1.5 sec | NA: 8       | LB: 0.3      |
| Nuts - \$mjpg0114702_75007.1 |               |             |             |              |



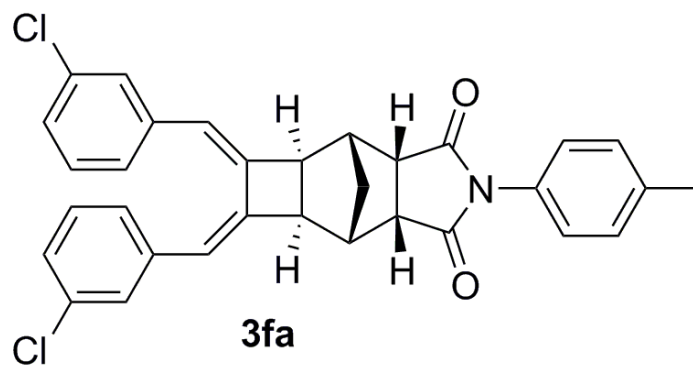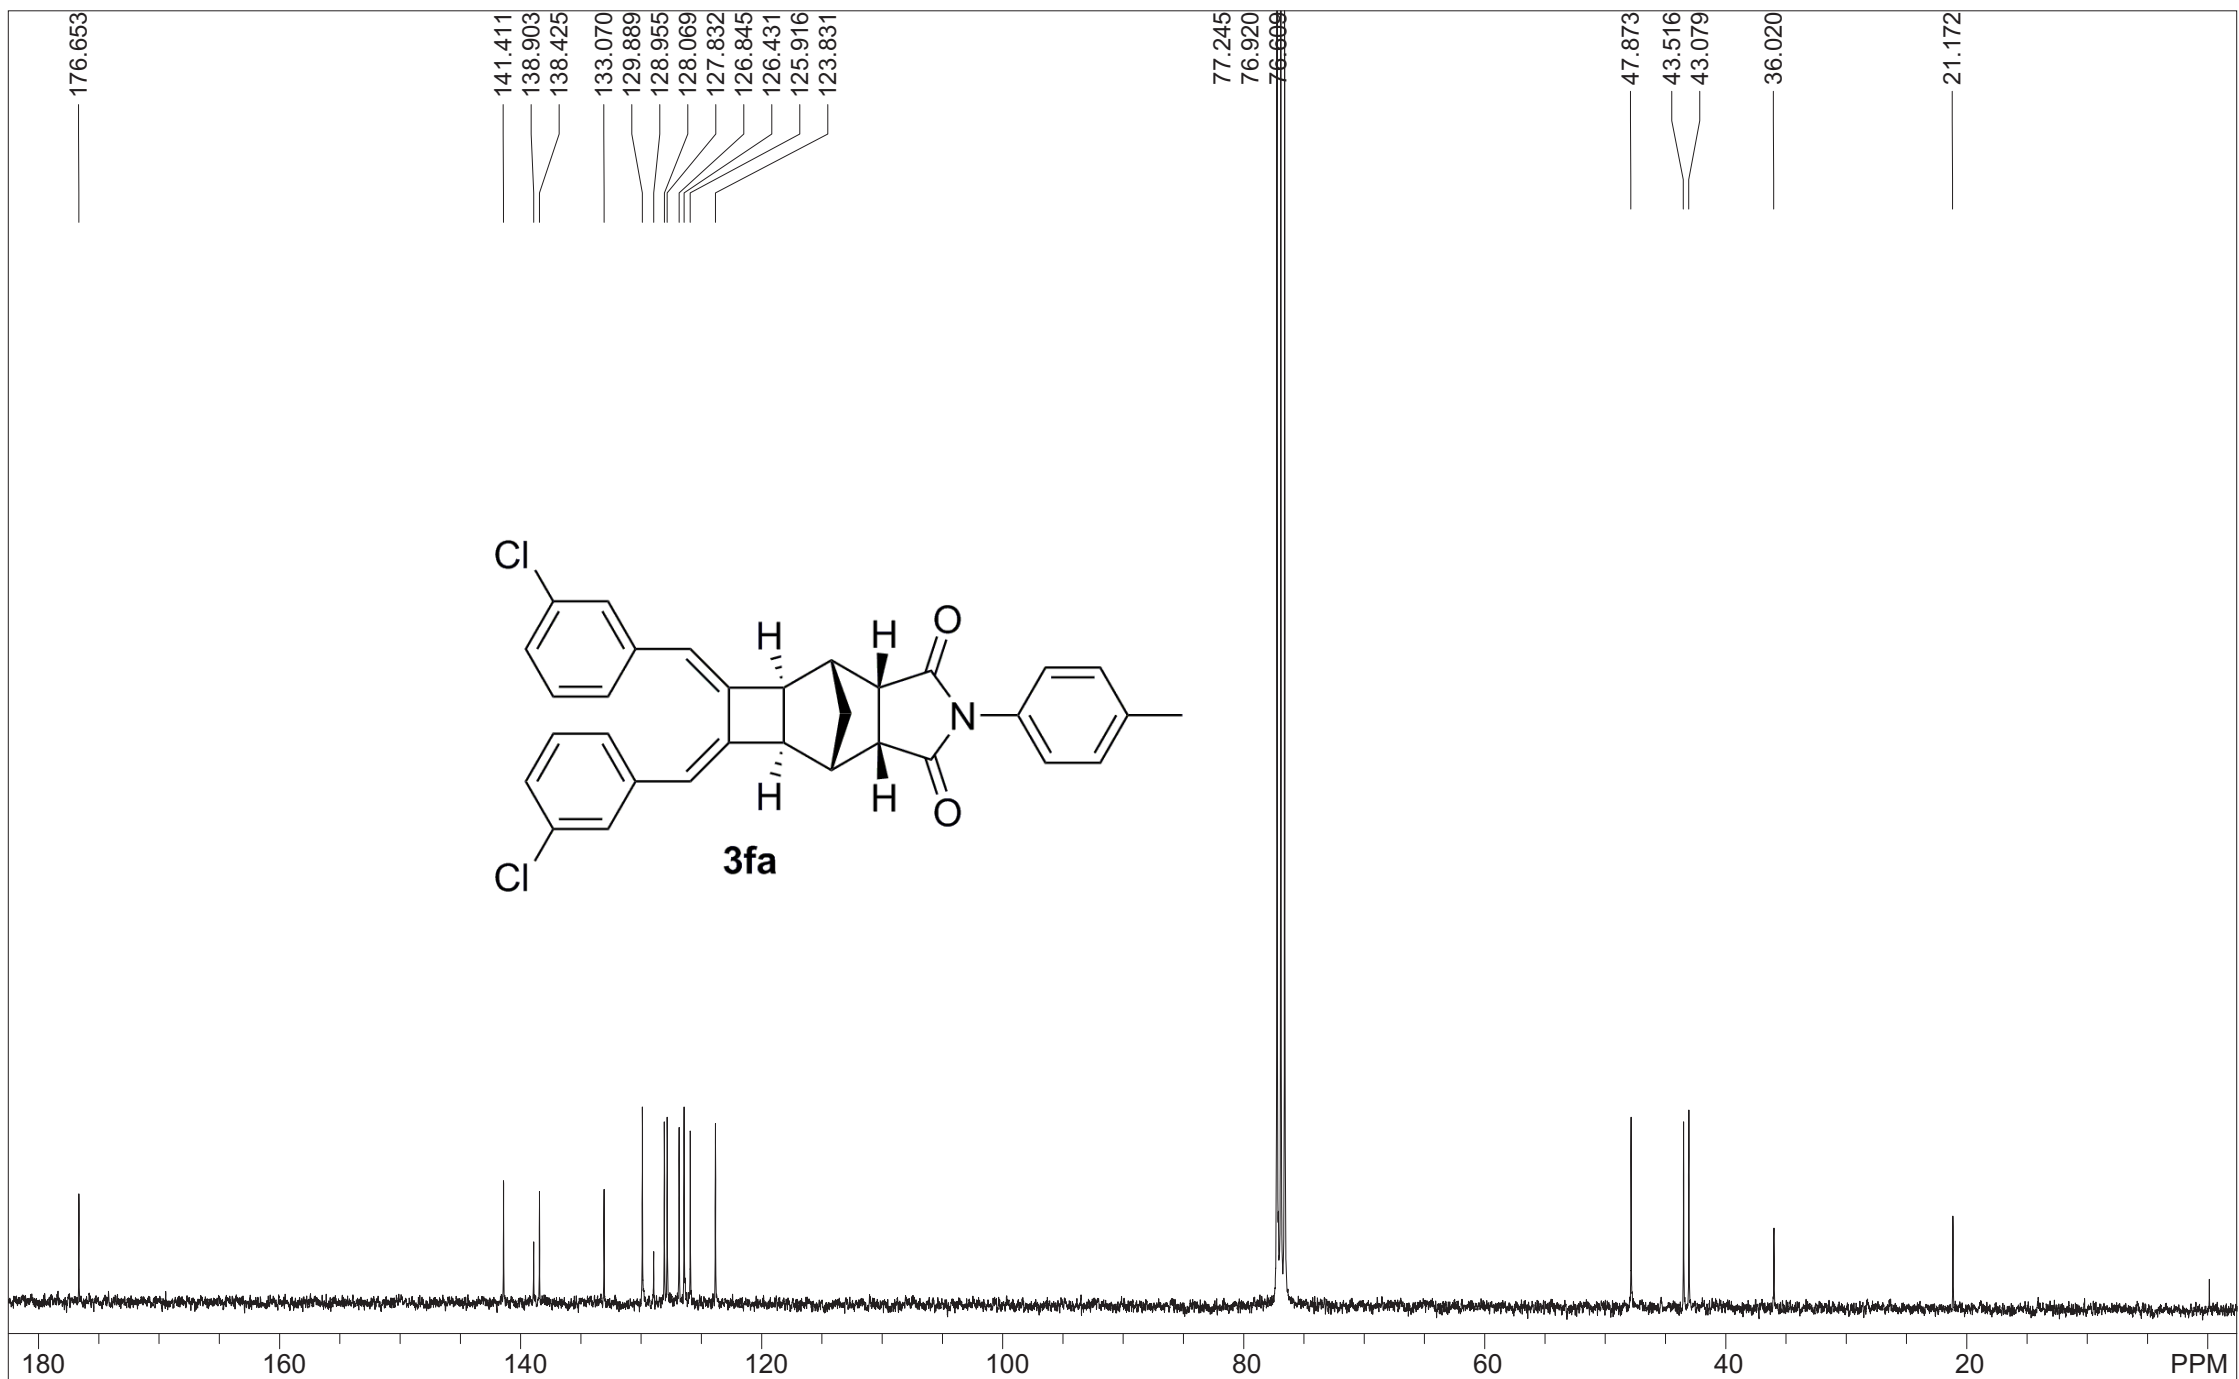

USER: root -- DATE: Jun 2 12:51:01 2012 (UT+8h) nmr@NMR

|             |              |             |              |              |
|-------------|--------------|-------------|--------------|--------------|
| F1: 100.613 | F2: 1.000    | SW1: 25126  | OF1: 11056.6 | PTS1d: 32768 |
| EX: zgdc30  | PW: 7.5 usec | PD: 1.0 sec | NA: 1525     | LB: 2.0      |

Nuts - \$mjpg0114702-C\_20625.1

7.323  
7.302  
7.276  
7.192  
7.171  
6.663  
6.650  
6.643  
6.629  
6.531  
6.509  
6.488  
6.262

3.384  
3.377  
3.372  
3.217  
3.030

2.408  
2.325  
2.298

1.669  
1.642  
1.592

0.016

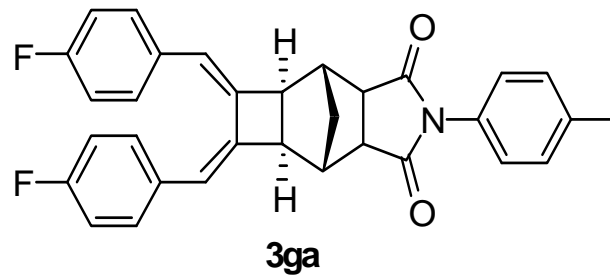

2.01  
2.04  
4.02  
4.03  
2.00

2.07  
2.02  
2.06

3.09  
1.02

1.09

8 7 6 5 4 3 2 1 0 PPM

USER: root -- DATE: May 22 14:54:52 2012 (UT+8h) nmr@NMR

|             |               |             |             |                              |
|-------------|---------------|-------------|-------------|------------------------------|
| F1: 400.130 | F2: 1.000     | SW1: 11990  | OF1: 3598.3 | PTS1d: 32768                 |
| EX: zg30    | PW: 12.5 usec | PD: 1.5 sec | NA: 8       | LB: 0.3                      |
|             |               |             |             | Nuts - \$mjpg0114401_74038.1 |

176.746

163.227

160.754

140.208

138.873

132.851

132.817

129.873

129.474

129.385

128.997

126.443

123.511

113.654

113.444

77.258

76.940

76.615

47.905

43.404

43.102

35.960

21.167

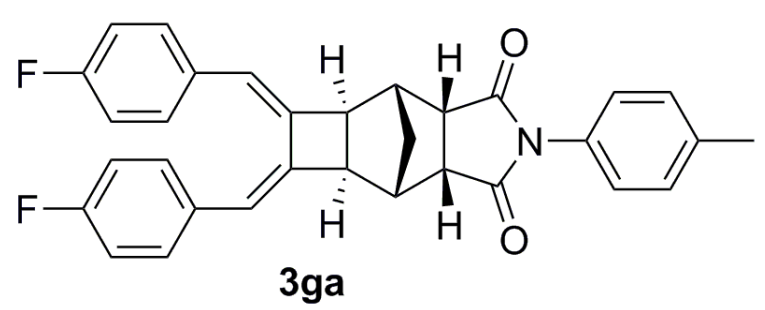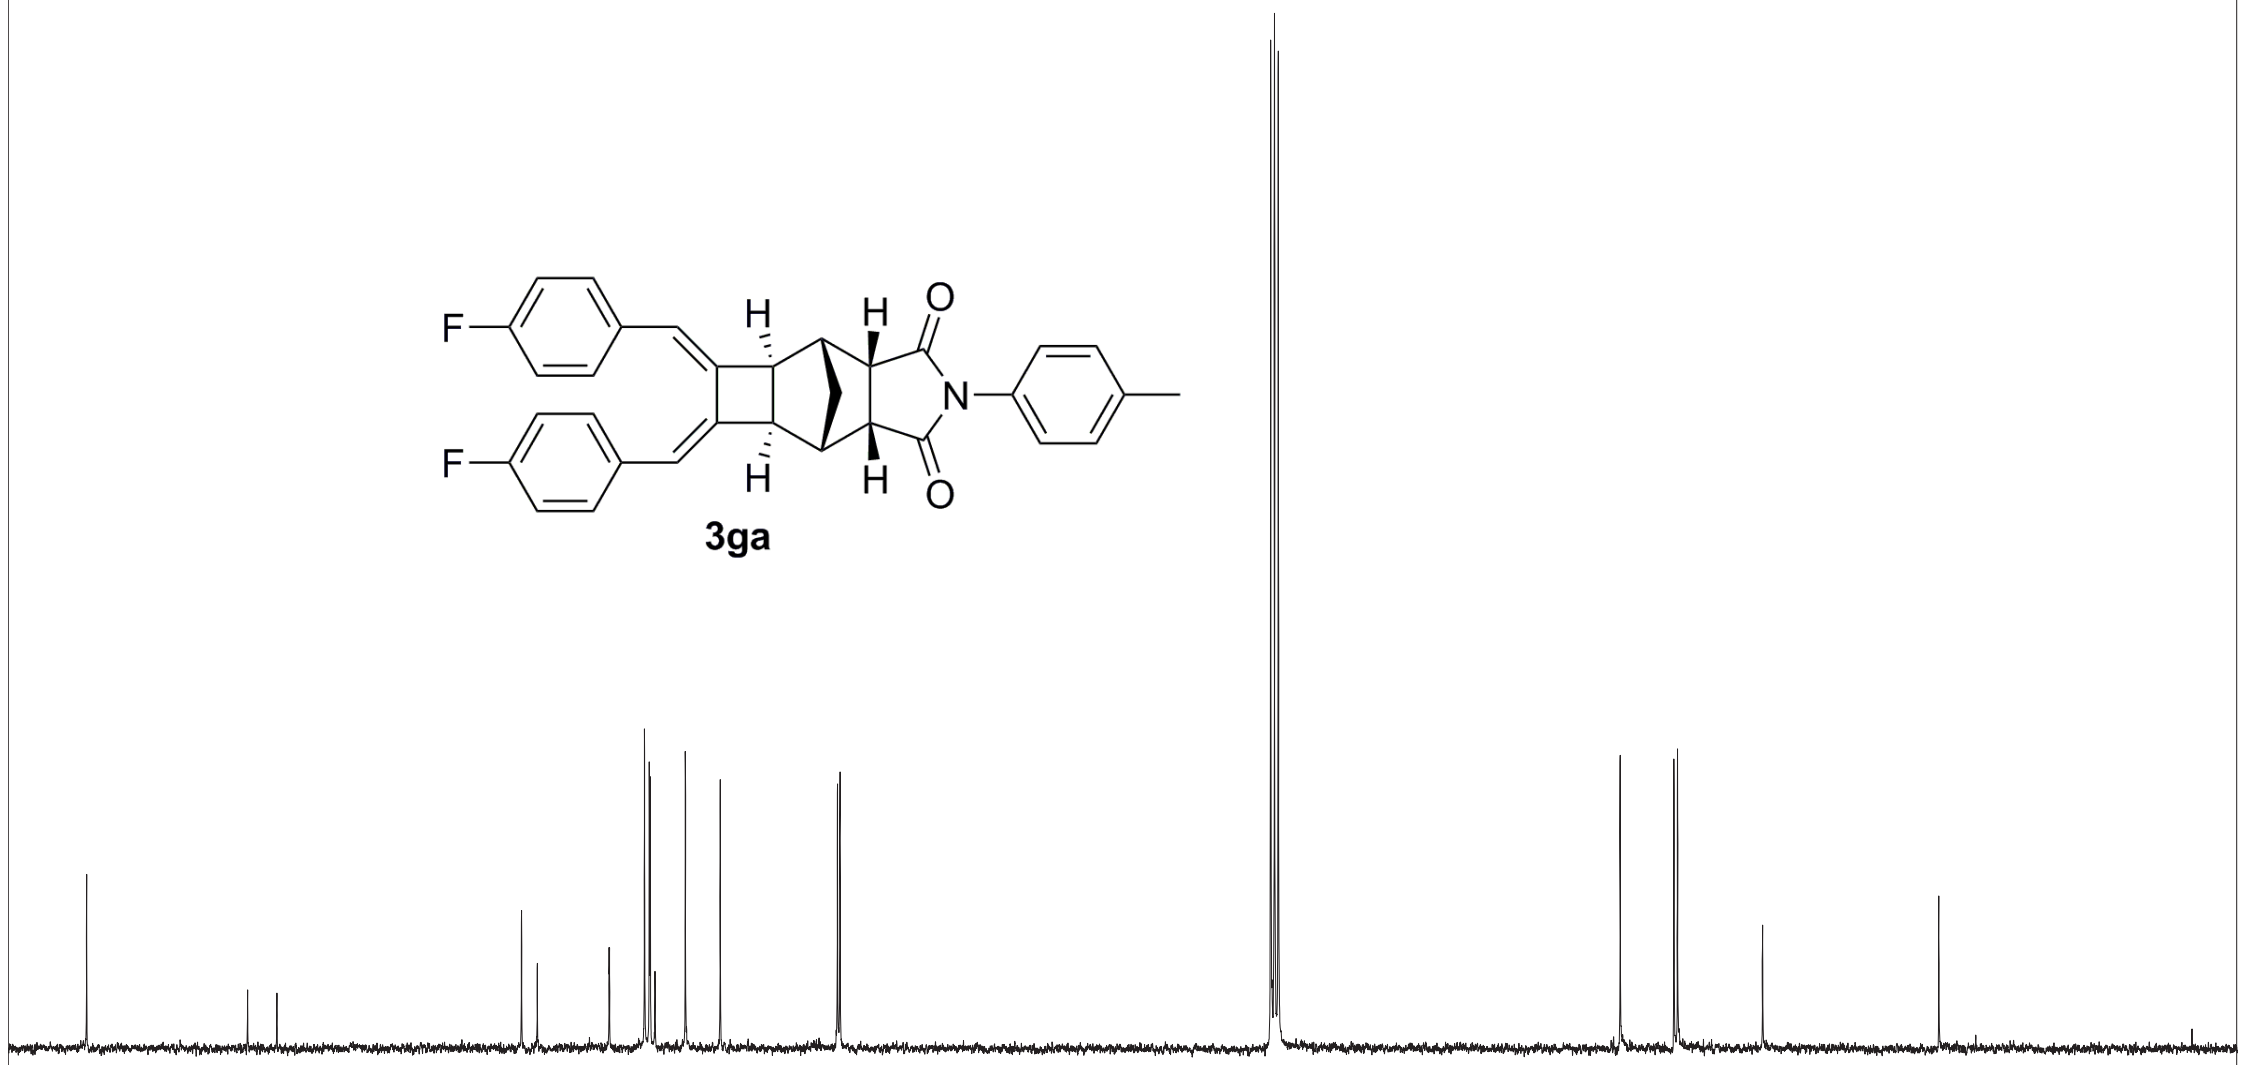

180 160 140 120 100 80 60 40 20 PPM

USER: root -- DATE: May 30 18:53:22 2012 (UT+8h) nmr@NMR

|             |              |             |              |              |
|-------------|--------------|-------------|--------------|--------------|
| F1: 100.613 | F2: 1.000    | SW1: 25126  | OF1: 11056.6 | PTS1d: 32768 |
| EX: zgdc30  | PW: 7.5 usec | PD: 1.0 sec | NA: 1620     | LB: 2.0      |

Nuts - \$mjpg0114401-C\_20590.1

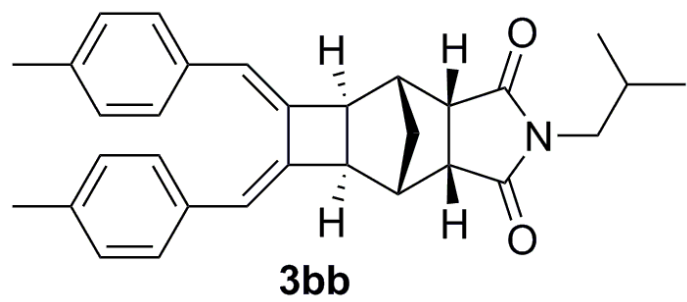

6.545  
6.524  
6.507  
6.487  
6.243

3.349  
3.332  
3.199  
3.023  
2.911

2.312  
2.286  
2.173  
2.120  
2.103  
2.087  
2.069  
2.052  
1.573  
1.546

0.962  
0.945

4.09  
4.11  
2.00

2.02  
2.03  
2.07  
2.00

1.04  
6.06  
1.08

1.01

6.14

8 7 6 5 4 3 2 1 PPM

USER: root -- DATE: Dec 14 17:13:44 2012 (UT+8h) nmr@NMR

|             |               |             |             |                             |
|-------------|---------------|-------------|-------------|-----------------------------|
| F1: 400.130 | F2: 1.000     | SW1: 11990  | OF1: 3598.0 | PTS1d: 32768                |
| EX: zg30    | PW: 12.5 usec | PD: 1.5 sec | NA: 8       | LB: 0.3                     |
|             |               |             |             | Nuts - \$mjq0203002_87058.1 |

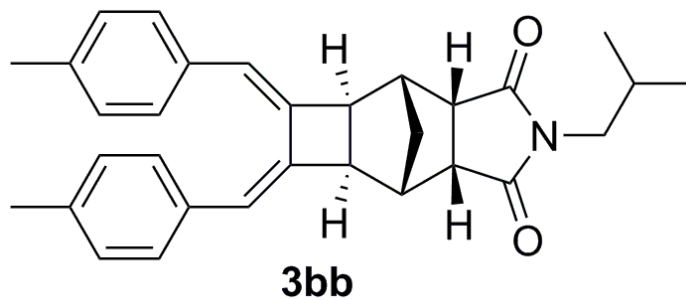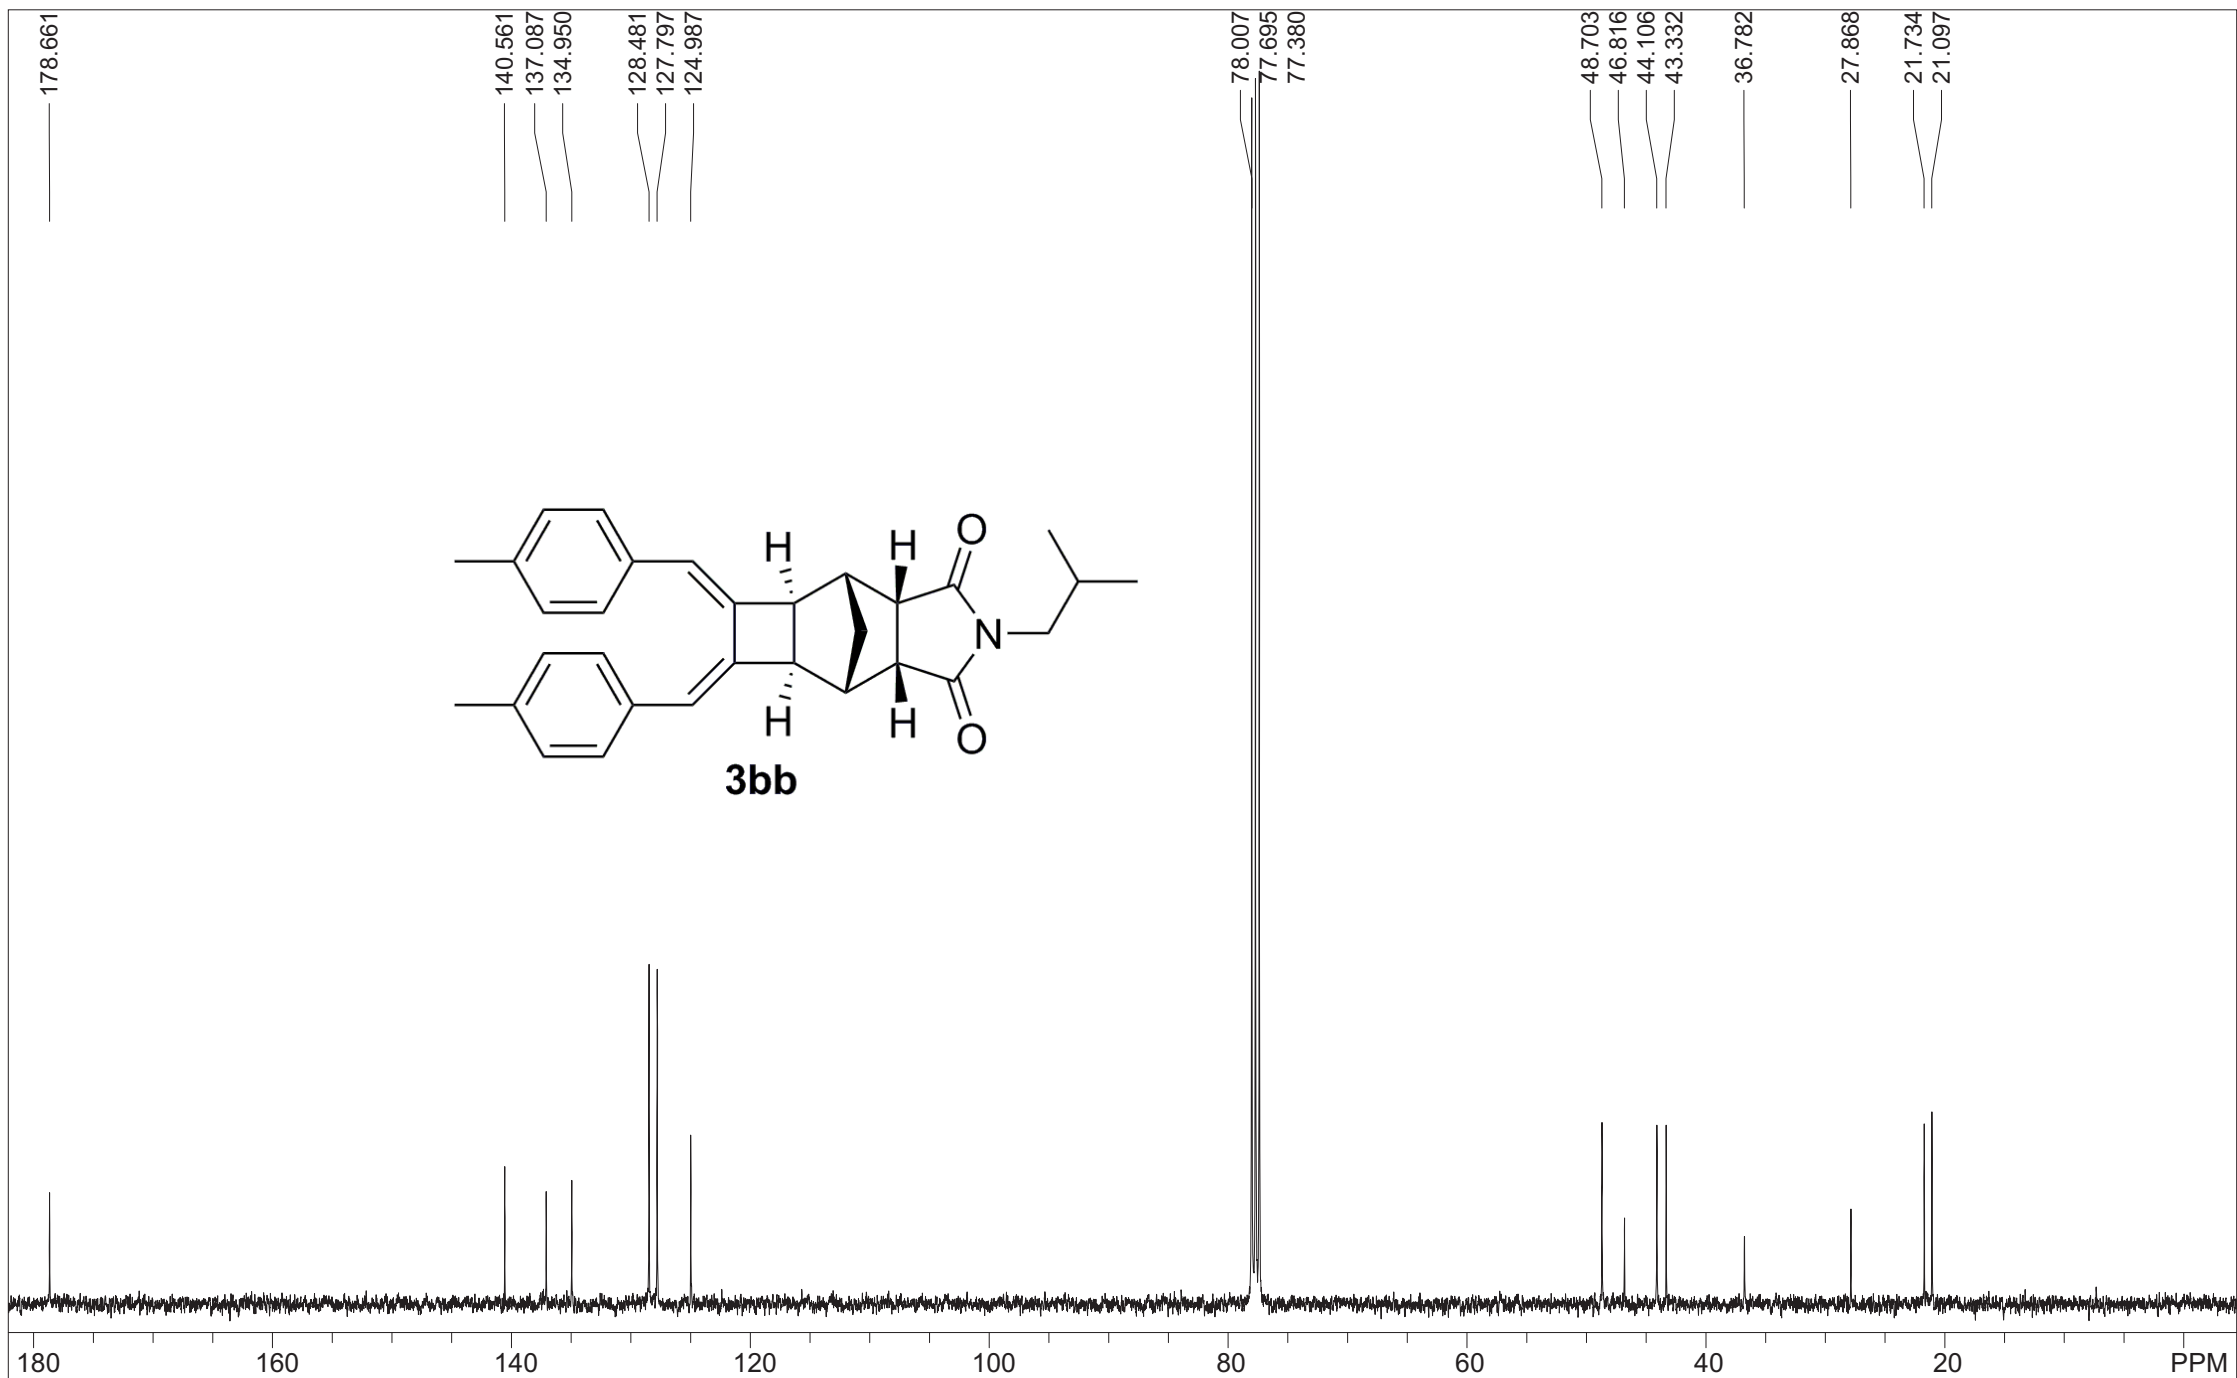

180 160 140 120 100 80 60 40 20 PPM

USER: root -- DATE: Dec 17 16:47:40 2012 (UT+8h) nmr@NMR

|             |              |             |              |              |
|-------------|--------------|-------------|--------------|--------------|
| F1: 100.613 | F2: 1.000    | SW1: 25126  | OF1: 11132.9 | PTS1d: 32768 |
| EX: zgdc30  | PW: 7.5 usec | PD: 1.0 sec | NA: 553      | LB: 2.0      |

Nuts - \$mjpg0203002-C\_21934.1

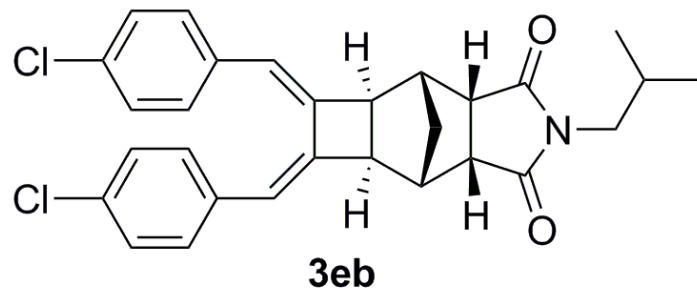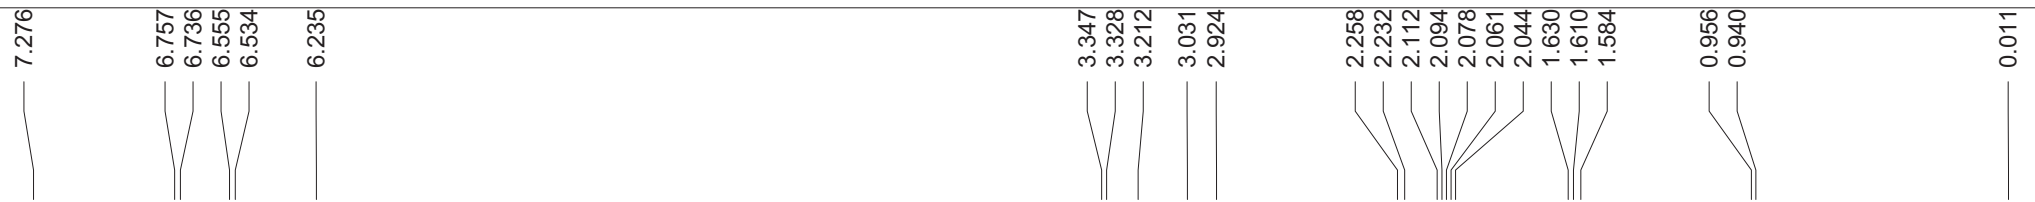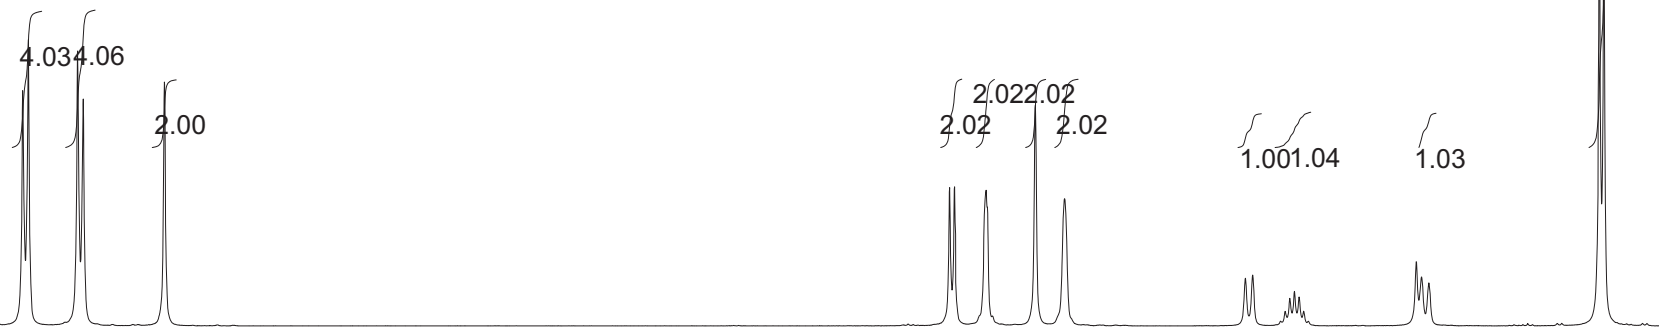

USER: root -- DATE: Nov 10 19:03:07 2012 (UT+8h) nmr@NMR

|             |               |             |             |              |
|-------------|---------------|-------------|-------------|--------------|
| F1: 400.130 | F2: 1.000     | SW1: 11990  | OF1: 3598.3 | PTS1d: 32768 |
| EX: zg30    | PW: 12.5 usec | PD: 1.5 sec | NA: 8       | LB: 0.3      |

Nuts - \$mjpg0123501\_84555.1

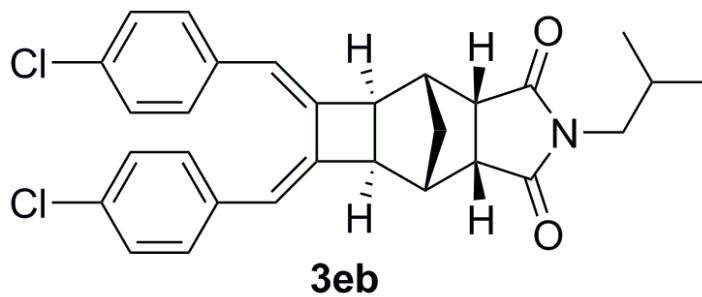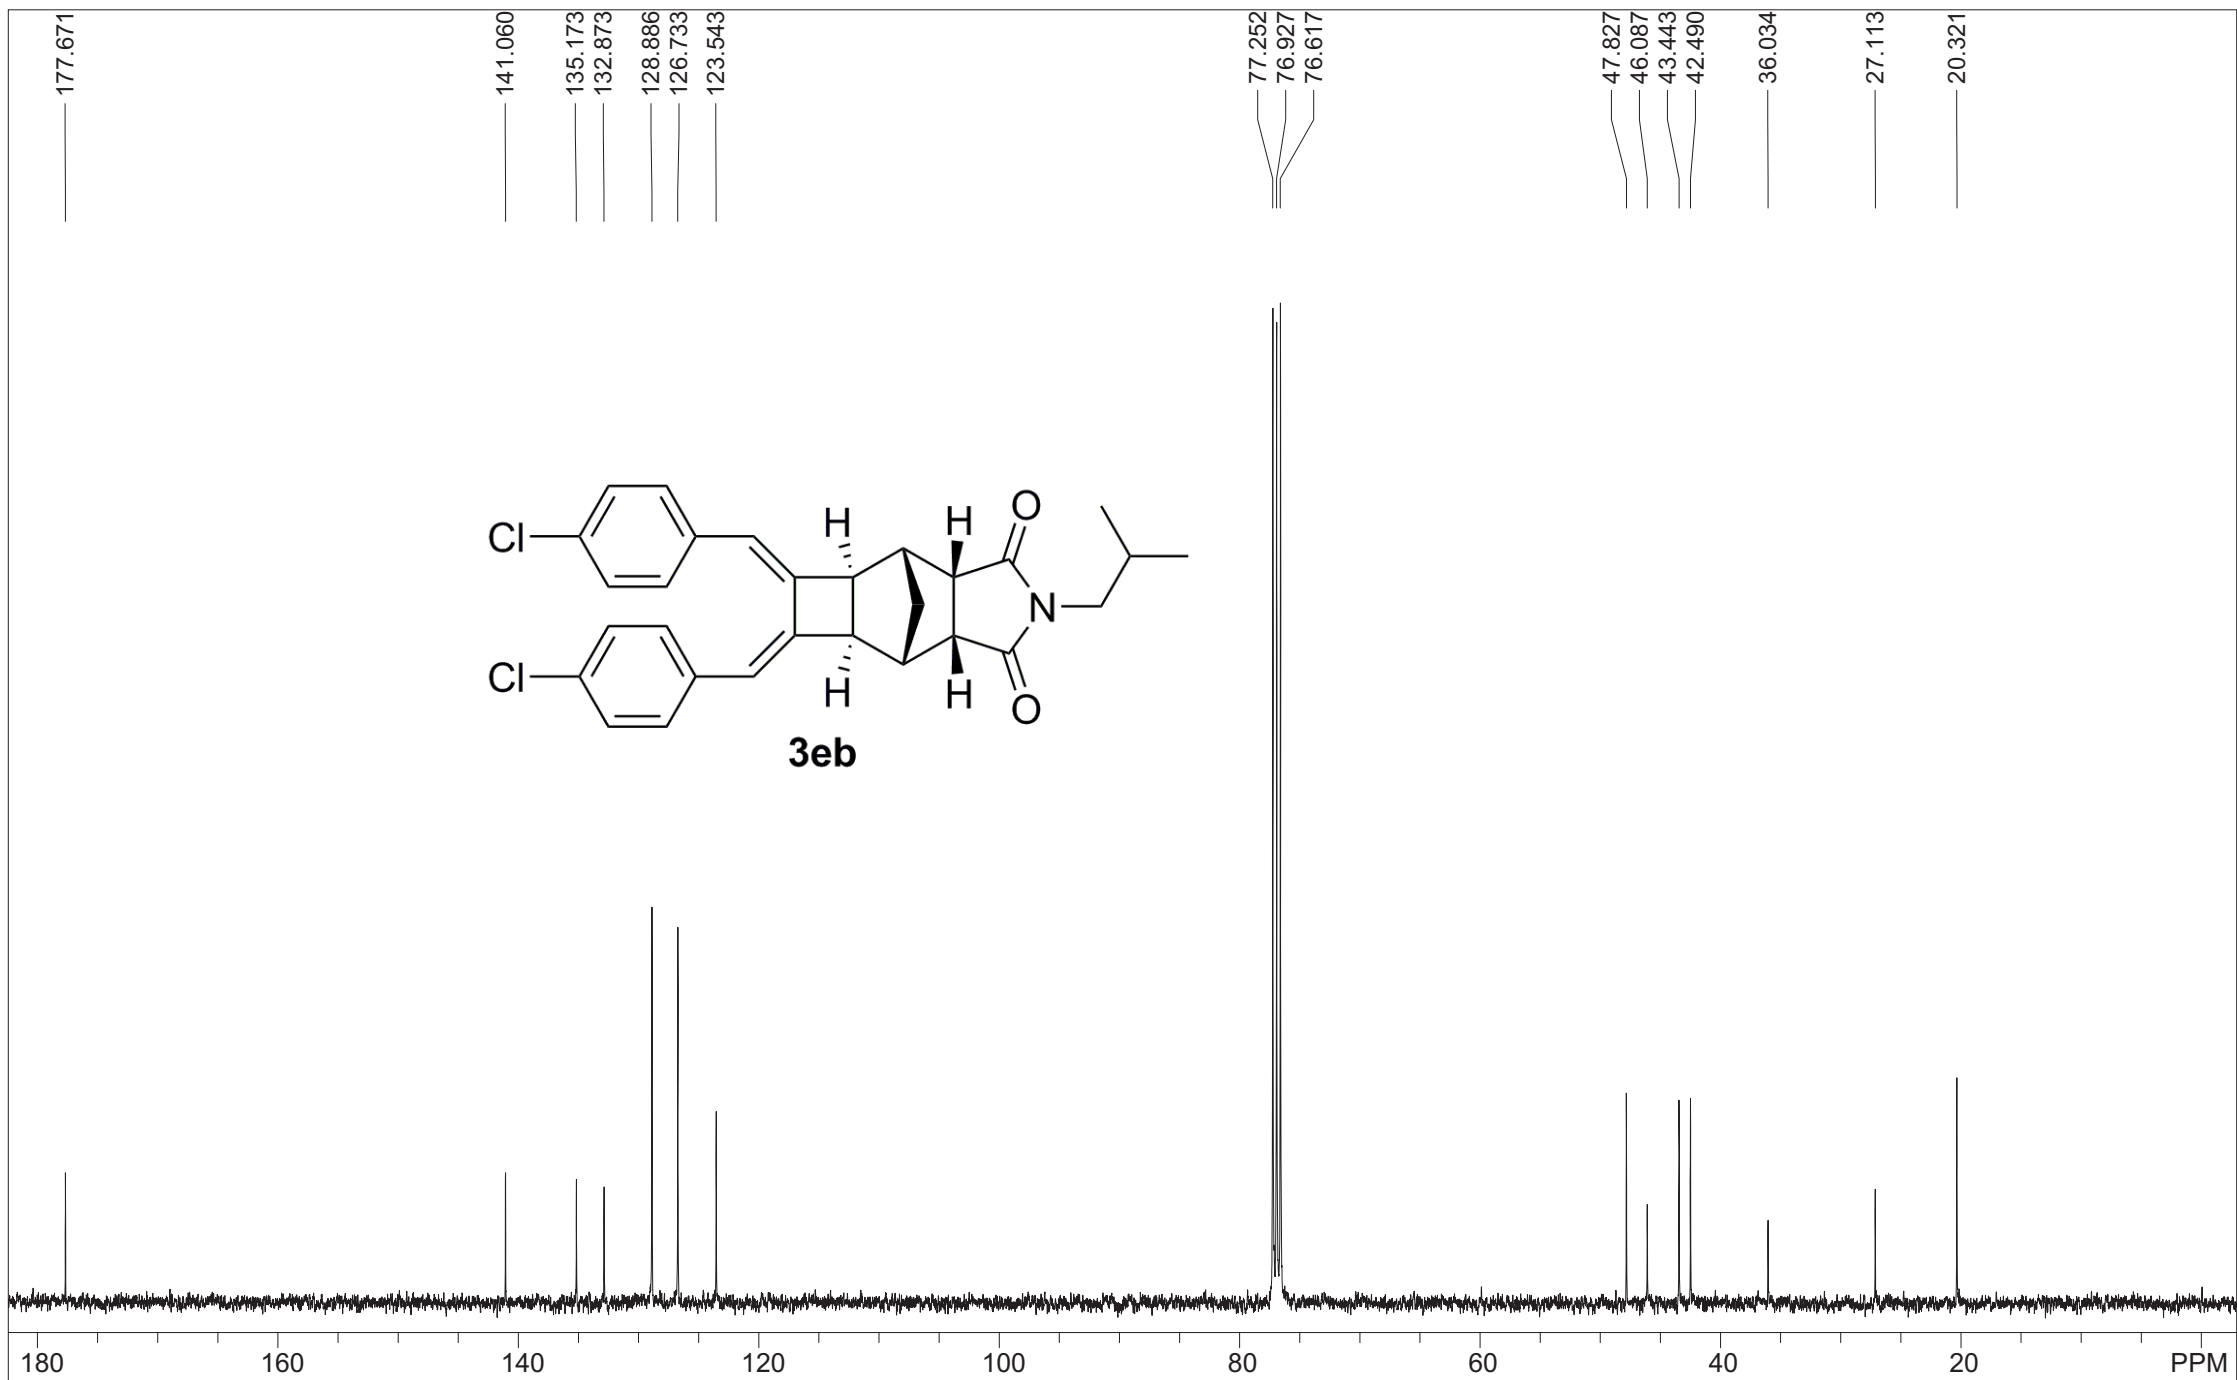

USER: root -- DATE: Nov 12 13:21:08 2012 (UT+8h) nmr@NMR

|             |              |             |              |              |
|-------------|--------------|-------------|--------------|--------------|
| F1: 100.613 | F2: 1.000    | SW1: 25126  | OF1: 11056.6 | PTS1d: 32768 |
| EX: zgdc30  | PW: 7.5 usec | PD: 1.0 sec | NA: 339      | LB: 2.0      |

Nuts - \$mjpg0123501-C\_21653.1

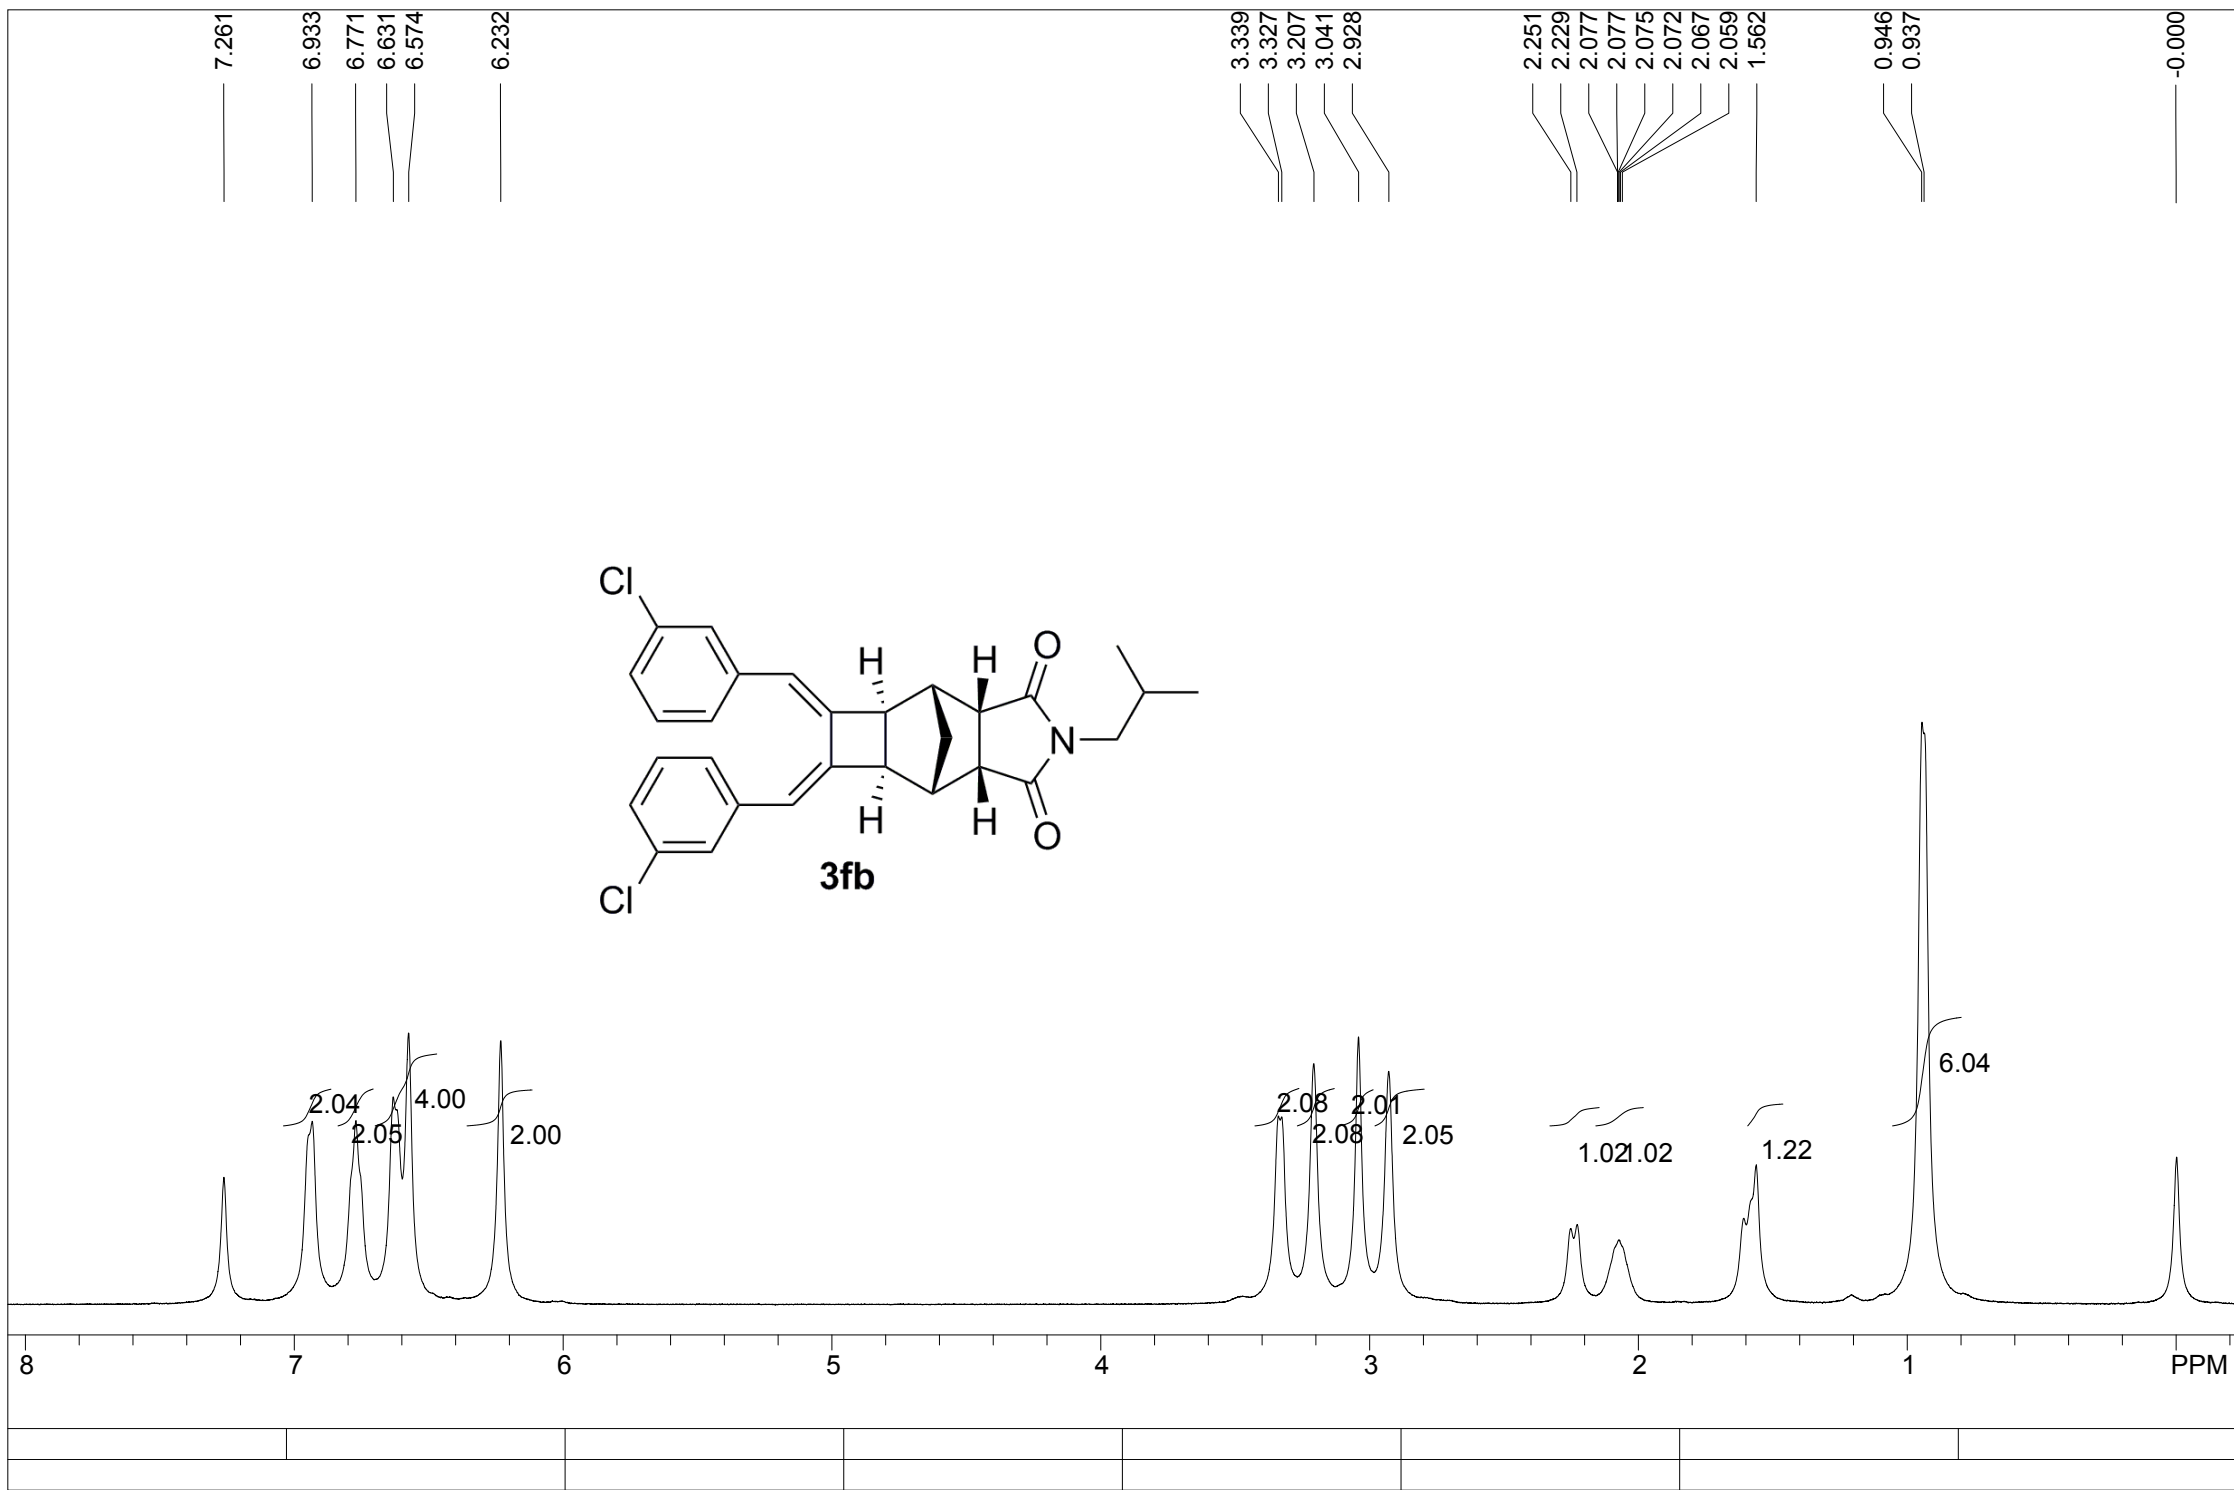



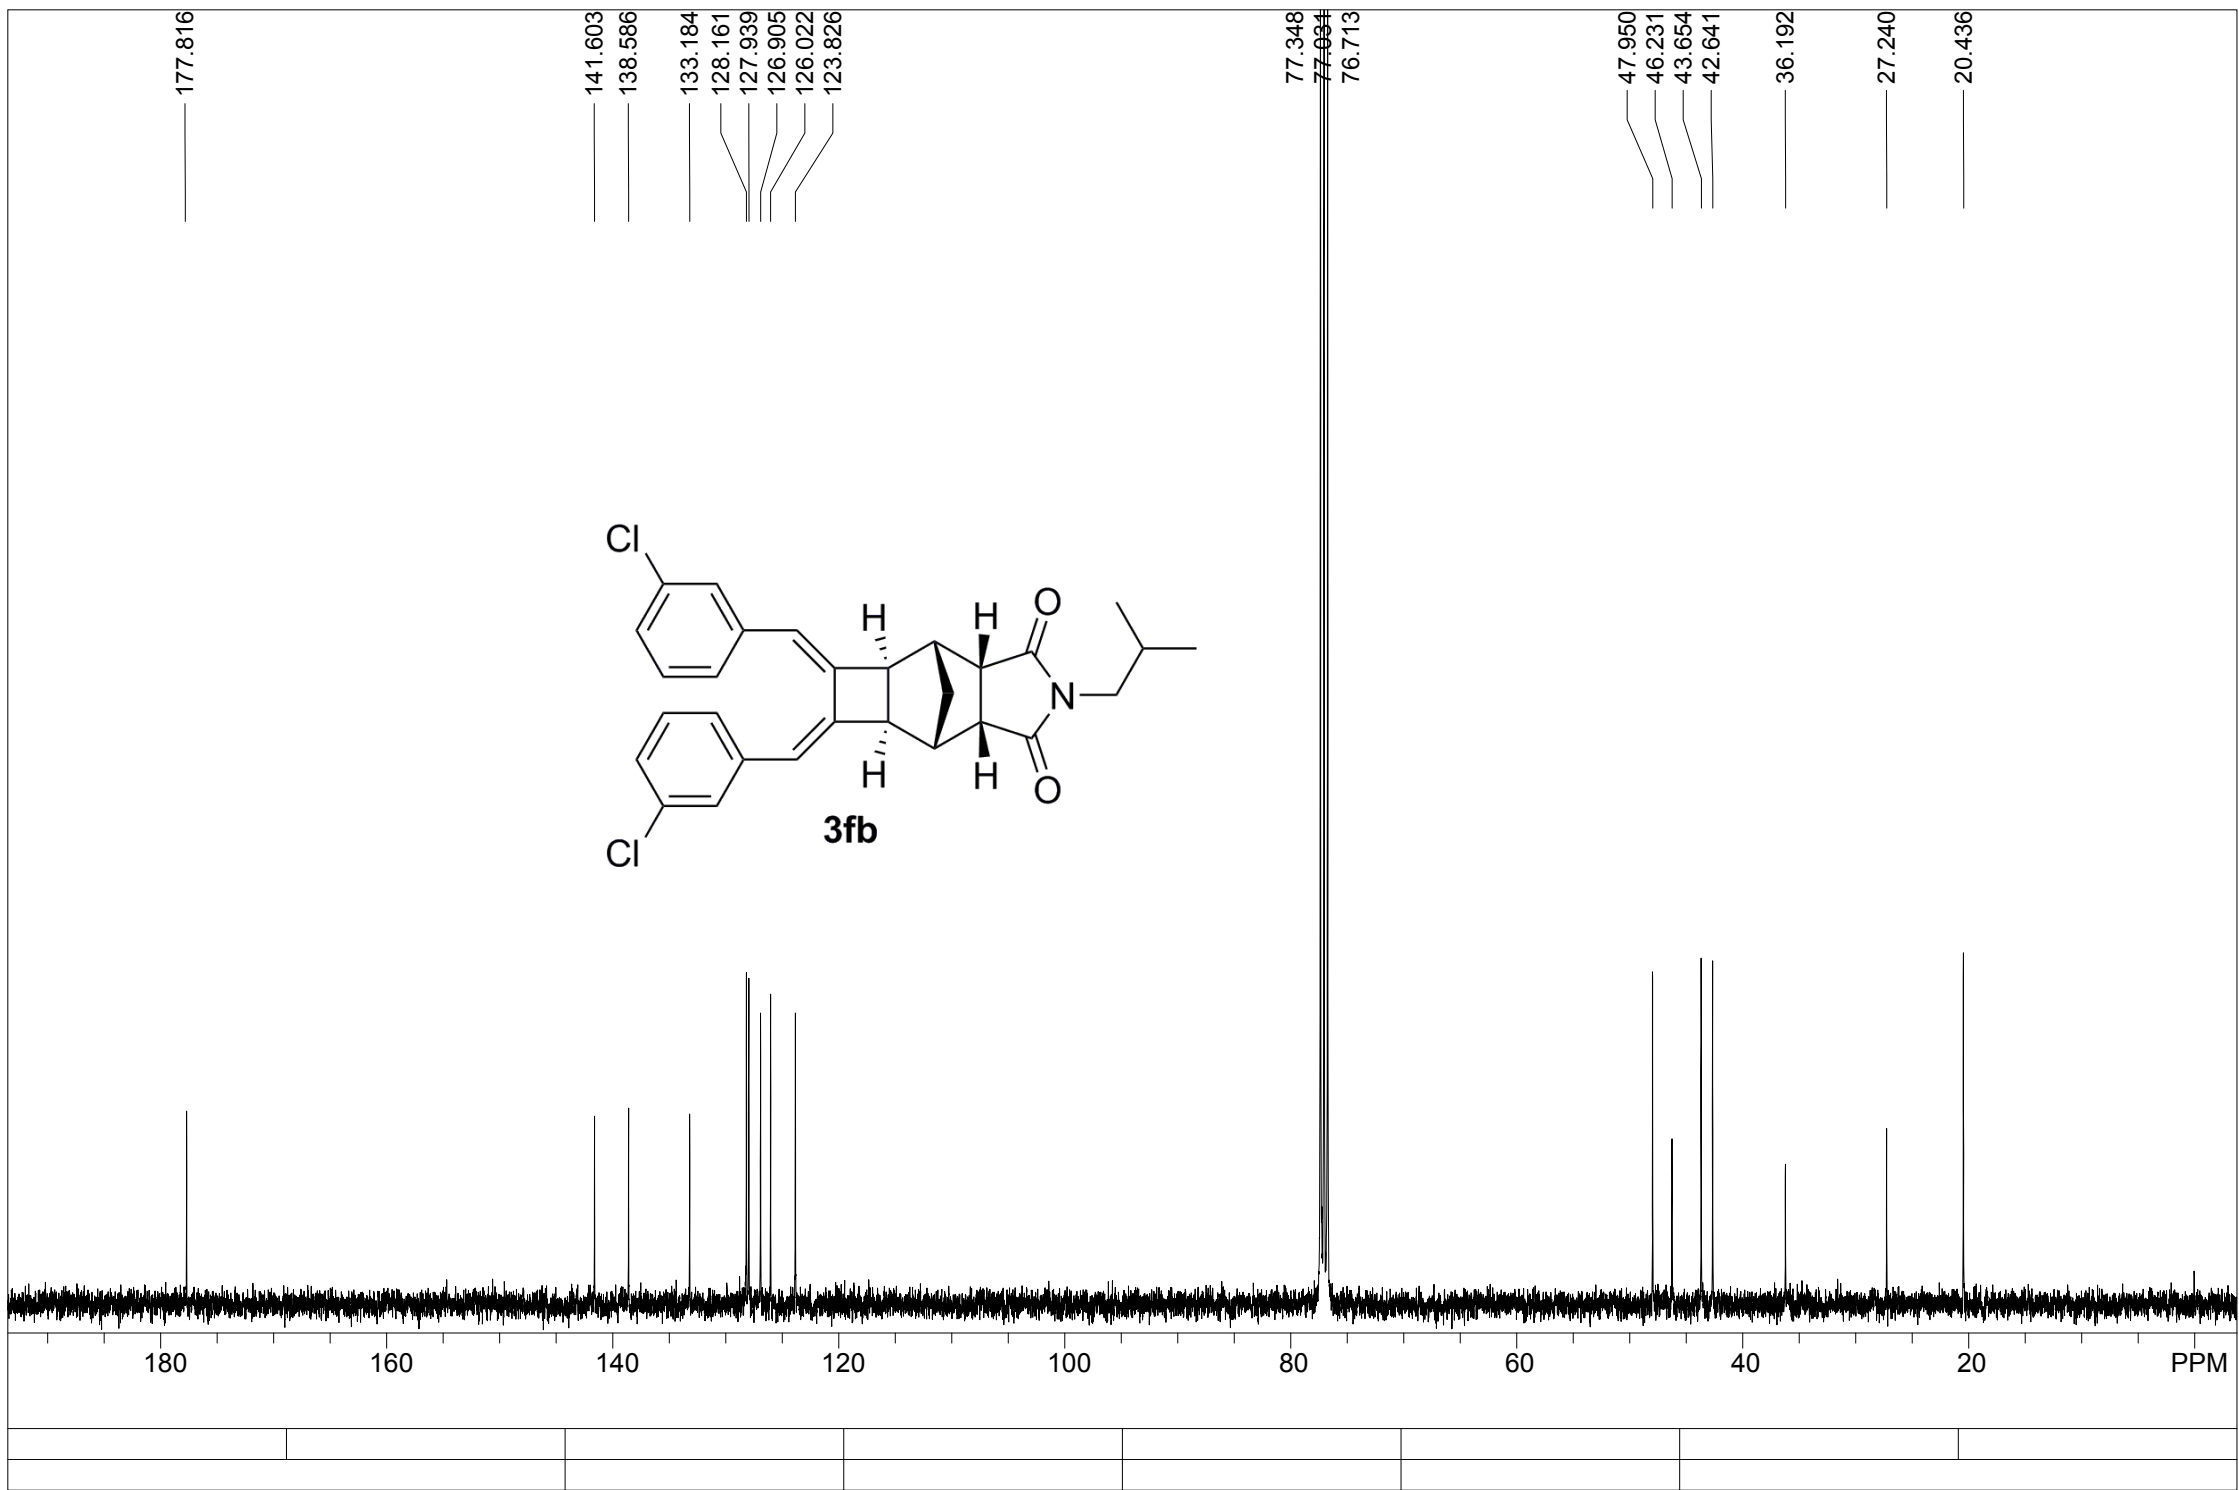

6.631  
6.613  
6.599  
6.503  
6.482  
6.461  
6.222

3.337  
3.319  
3.197  
3.017  
2.907

2.260  
2.233  
2.120  
2.103  
2.087  
2.070  
2.053  
2.037  
1.600  
1.564

0.946  
0.930

-0.000

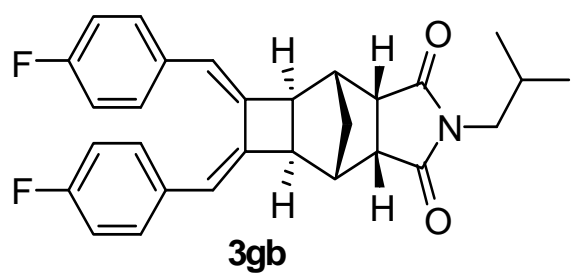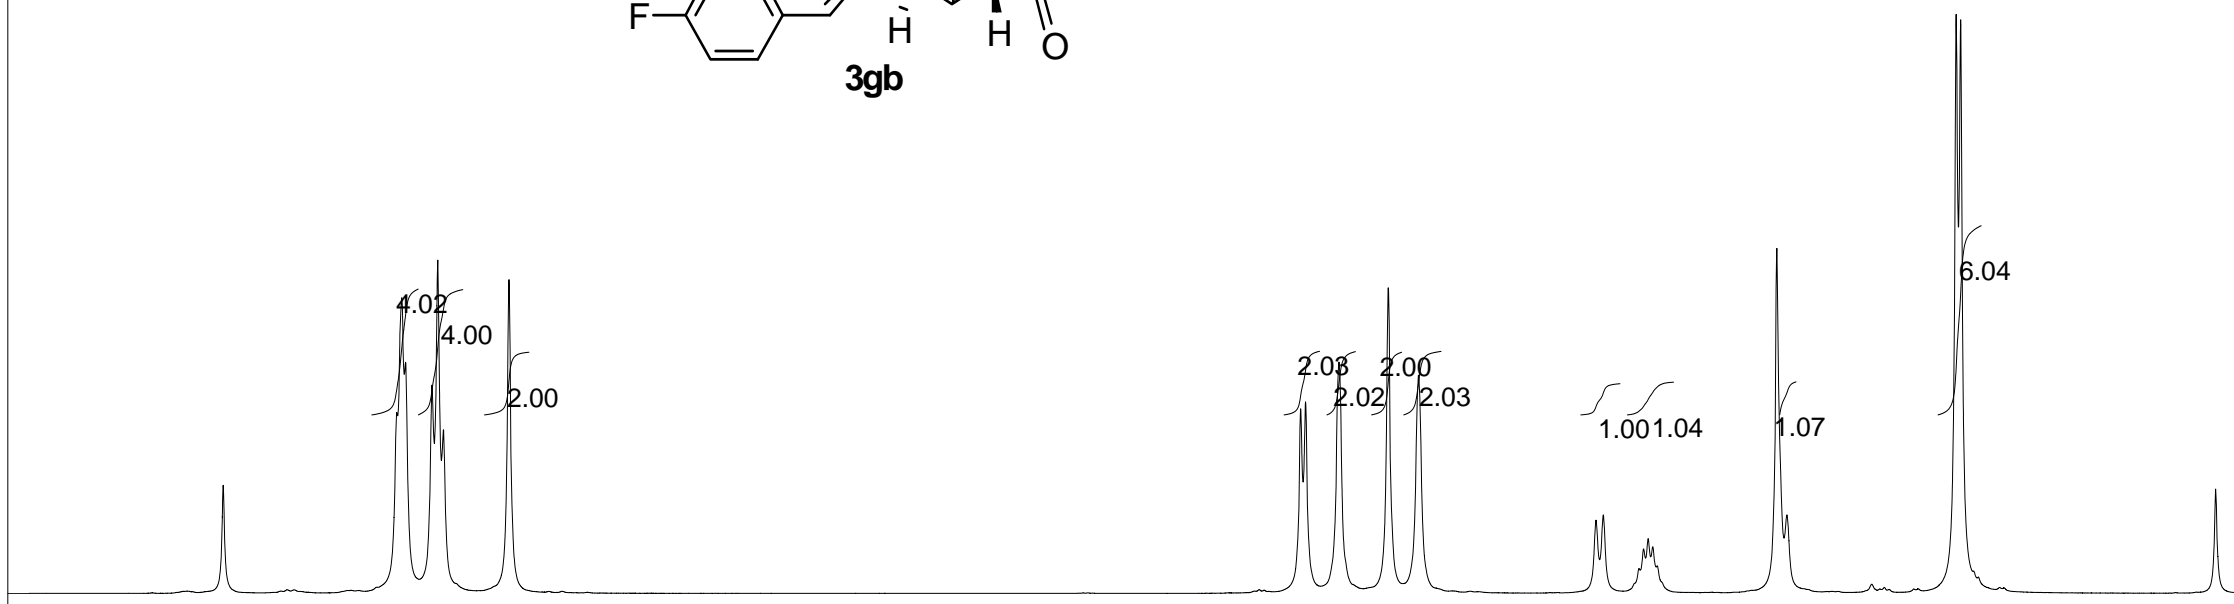

8 7 6 5 4 3 2 1 PPM

|               |              |                                               |             |              |                |
|---------------|--------------|-----------------------------------------------|-------------|--------------|----------------|
| spect, CDCl3, |              | USER: nmrsu -- DATE: Sat Jun 21 13:26:55 2014 |             |              |                |
| F1: 400.132   | F2: 1.000    | SW1: 8013                                     | OF1: 2462.8 | PTS1d: 65536 |                |
| EX: zg30      | PW: 9.8 usec | PD: 1.0 sec                                   | NA: 64      | LB: 0.0      | Nuts - \$pdata |

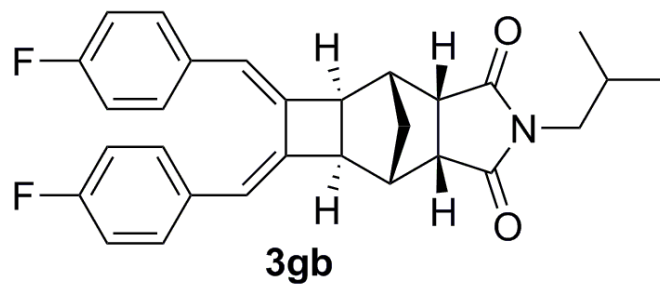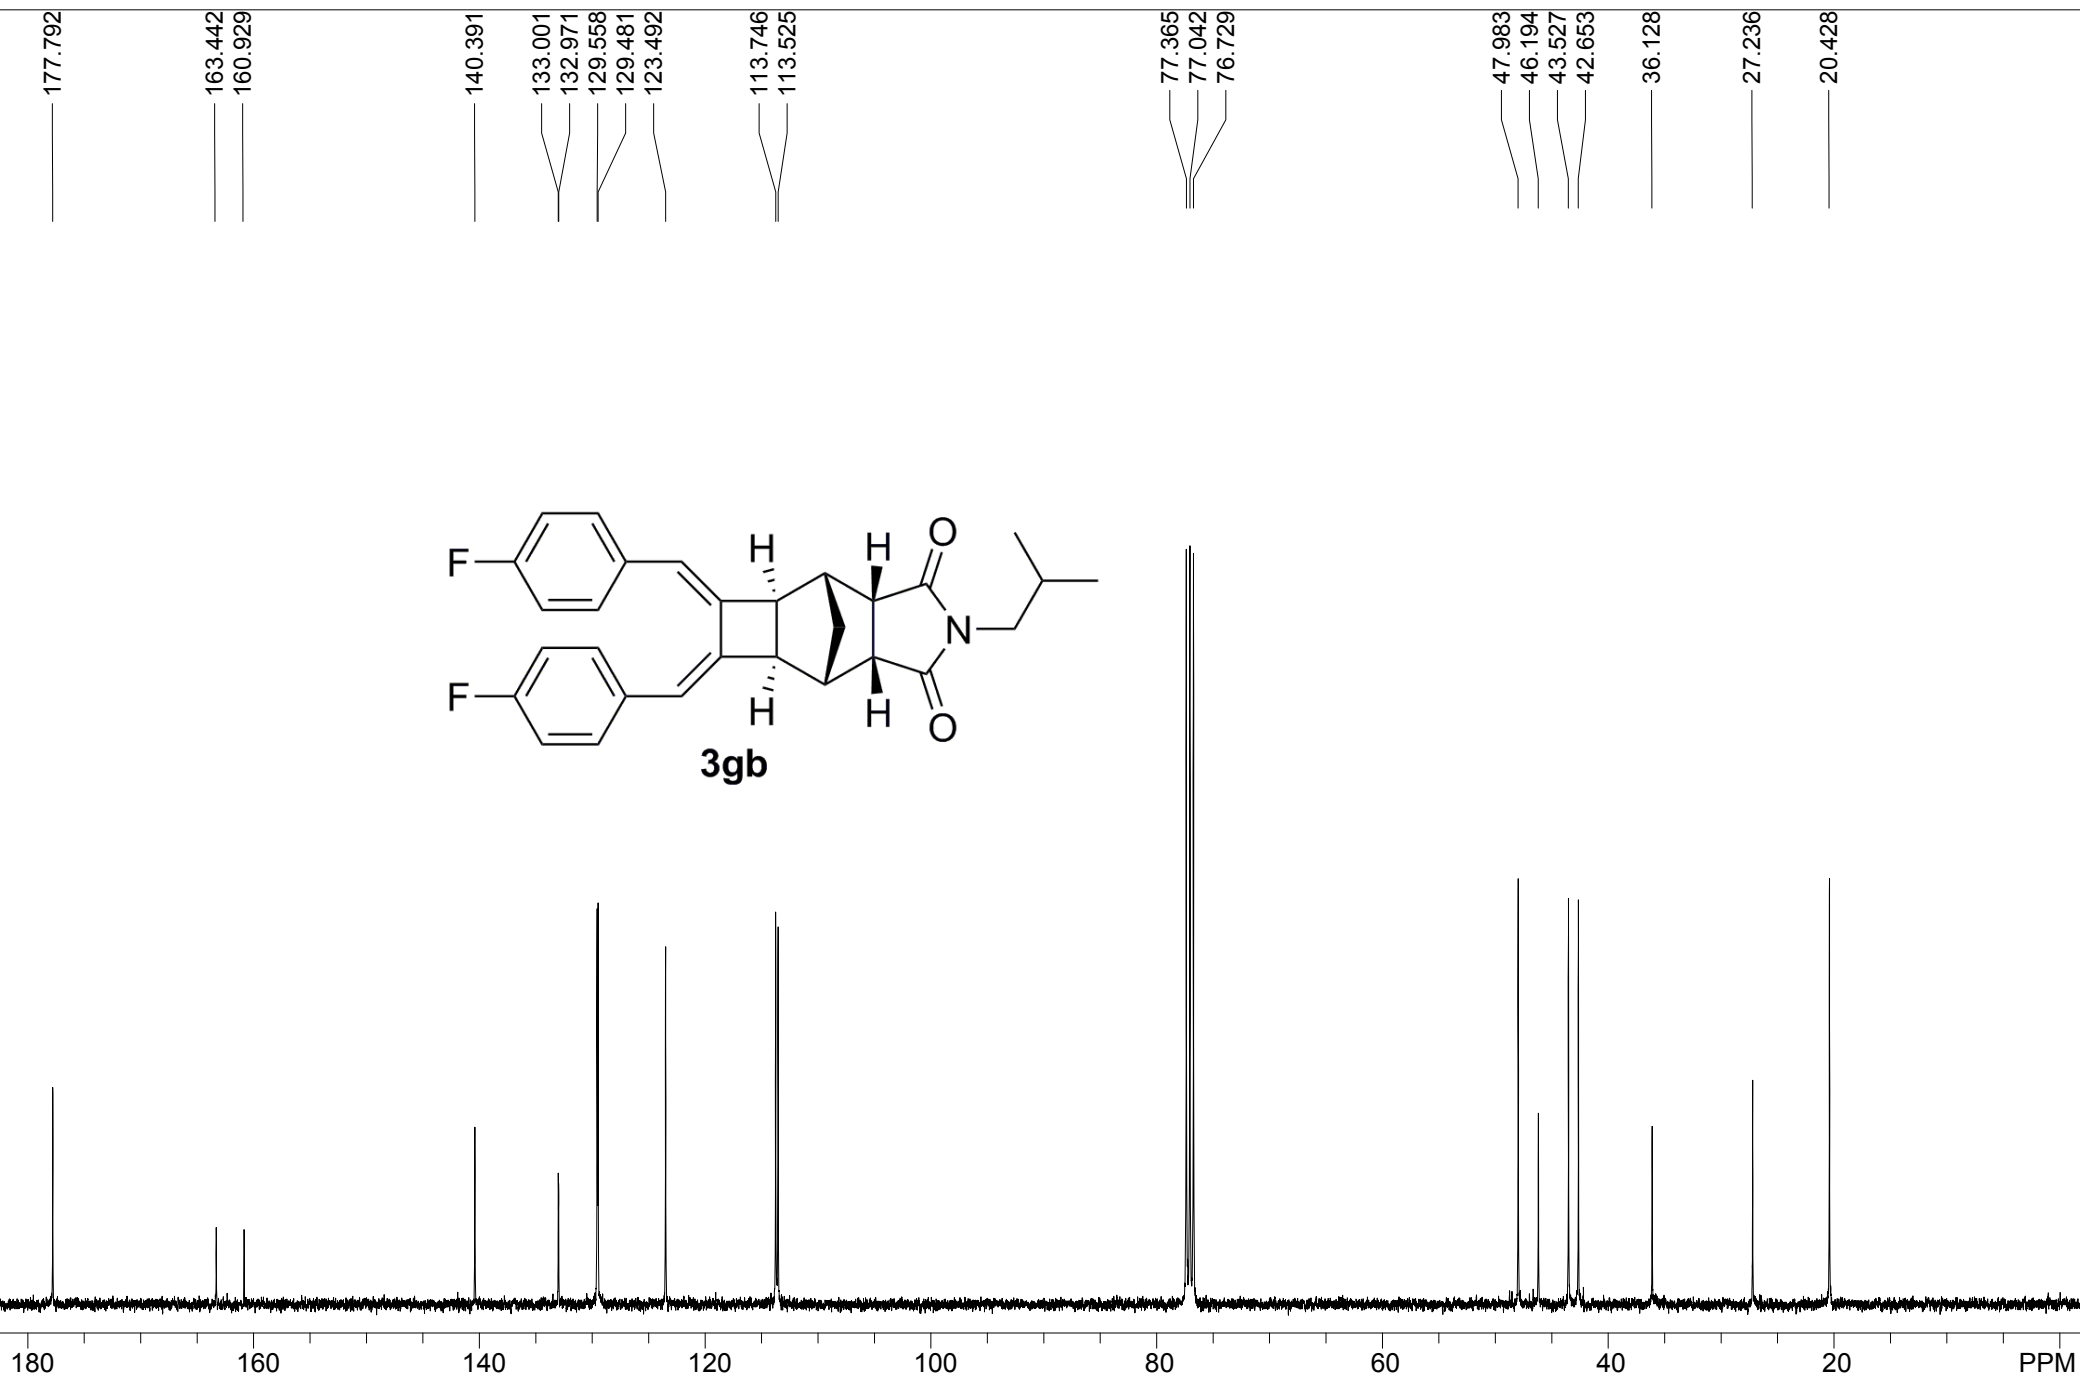

6.825  
6.807  
6.789  
6.648  
6.629  
6.610  
6.590  
6.572  
6.112

5.606  
5.597  
5.543  
5.541

3.096  
3.090  
3.084  
3.079  
3.072  
2.960  
2.945  
2.839  
2.825  
2.621  
2.607  
2.596  
2.587  
2.572  
2.563  
2.411  
2.402  
2.295  
2.253  
2.231  
2.206  
2.202  
1.993  
1.968  
1.325  
1.300

-0.001

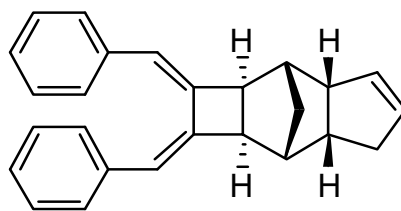

3ac

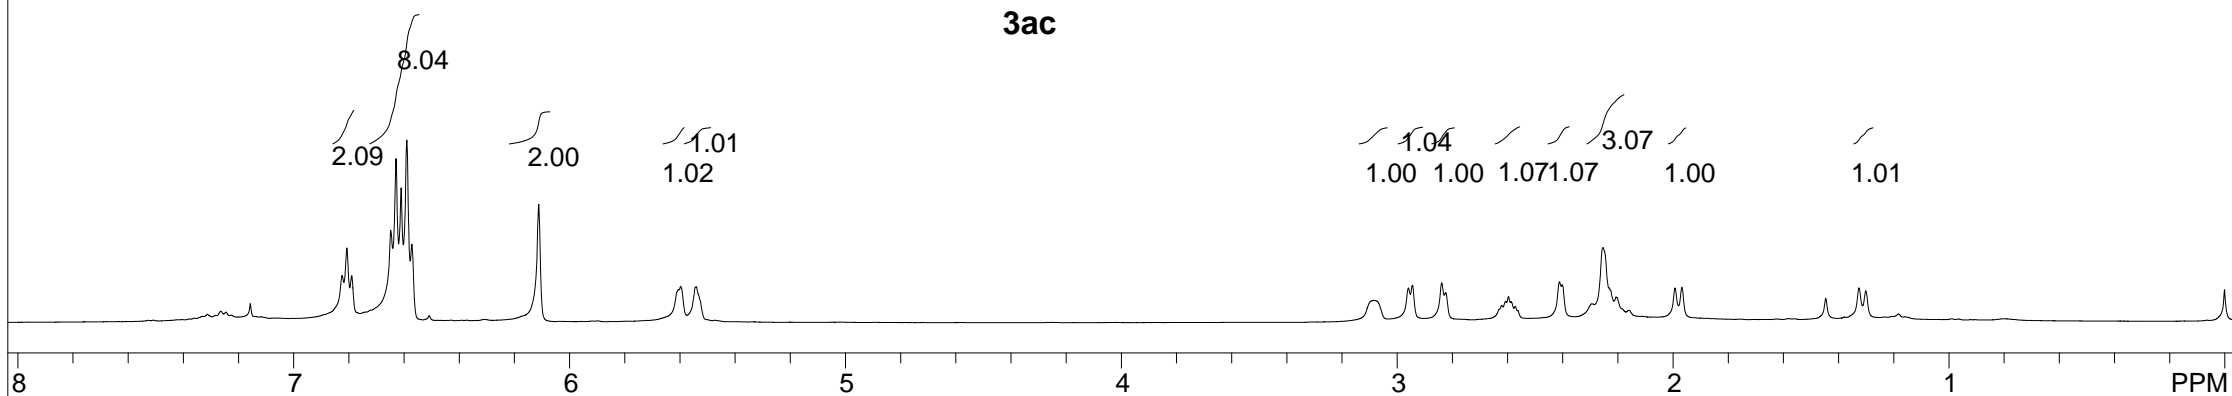

spect. CDCl3.

USER: nmrsu -- DATE: Tue Oct 07 08:42:09 2014

F1: 400.132

F2: 1.000

SW1: 8013

OF1: 2420.0

PTS1d: 65536

EX: zg30

PW: 9.8 usec

PD: 1.0 sec

NA: 16

LB: 0.0

Nuts - \$pdata

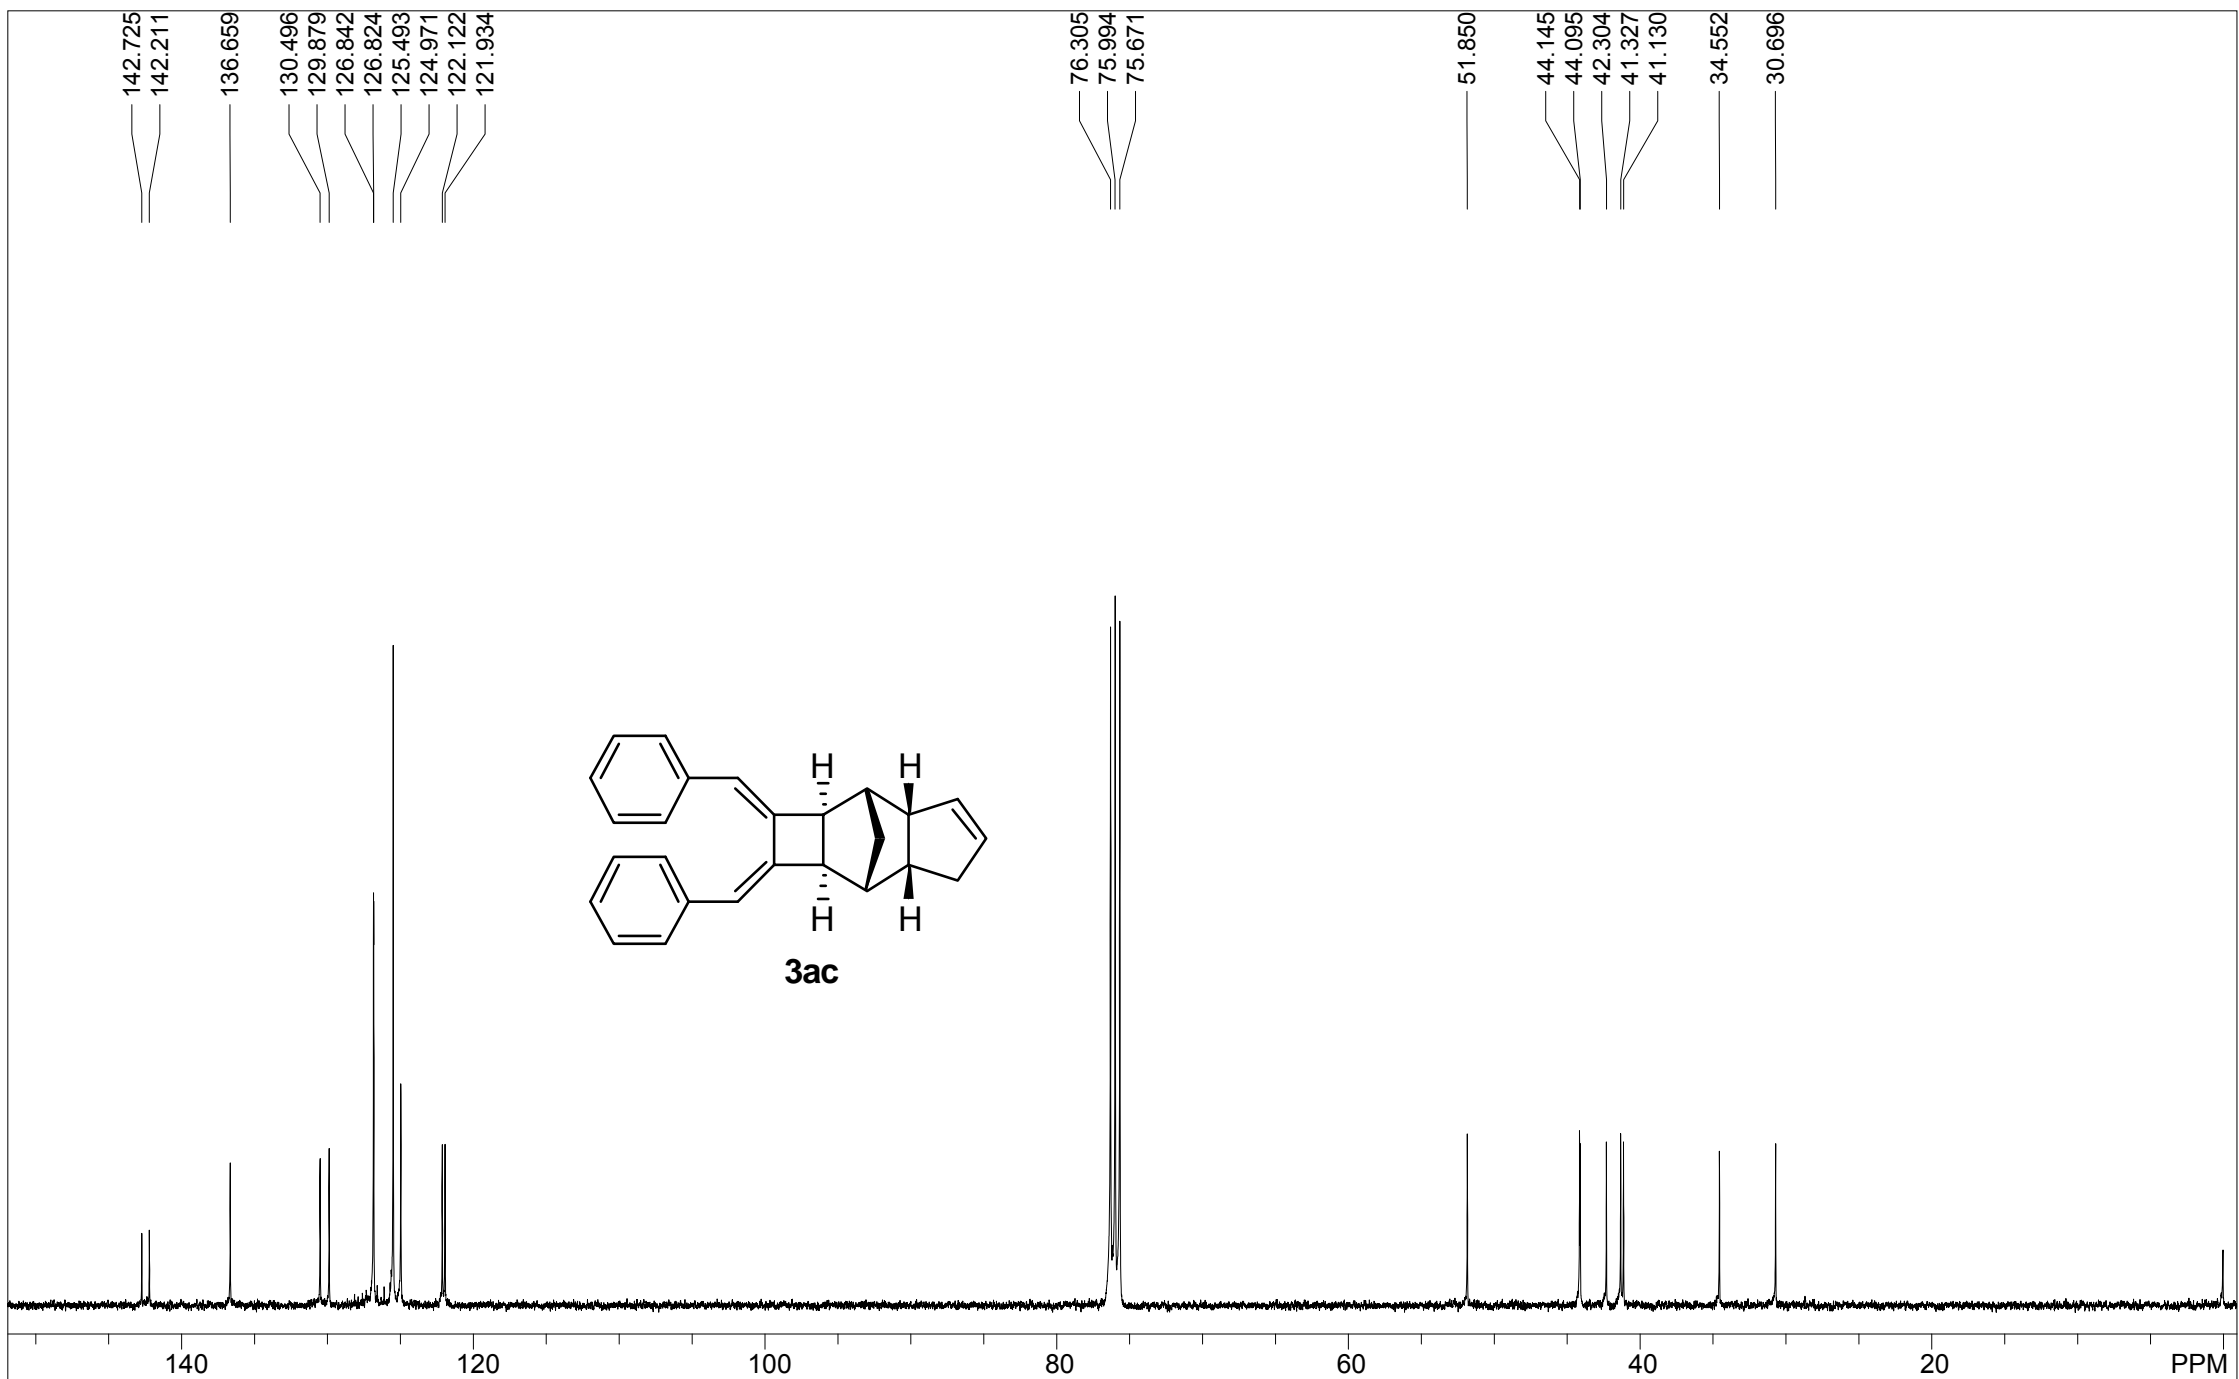

spect, CDC13,

USER: nmrsu -- DATE: Sat Jun 14 19:04:24 2014

F1: 100.623

F2: 1.000

SW1: 24038

OF1: 9958.3

PTS1d: 32768

EX: zgdc30

PW: 9.5 usec

PD: 1.2 sec

NA: 1024

LB: 0.0

Nuts - \$pdata

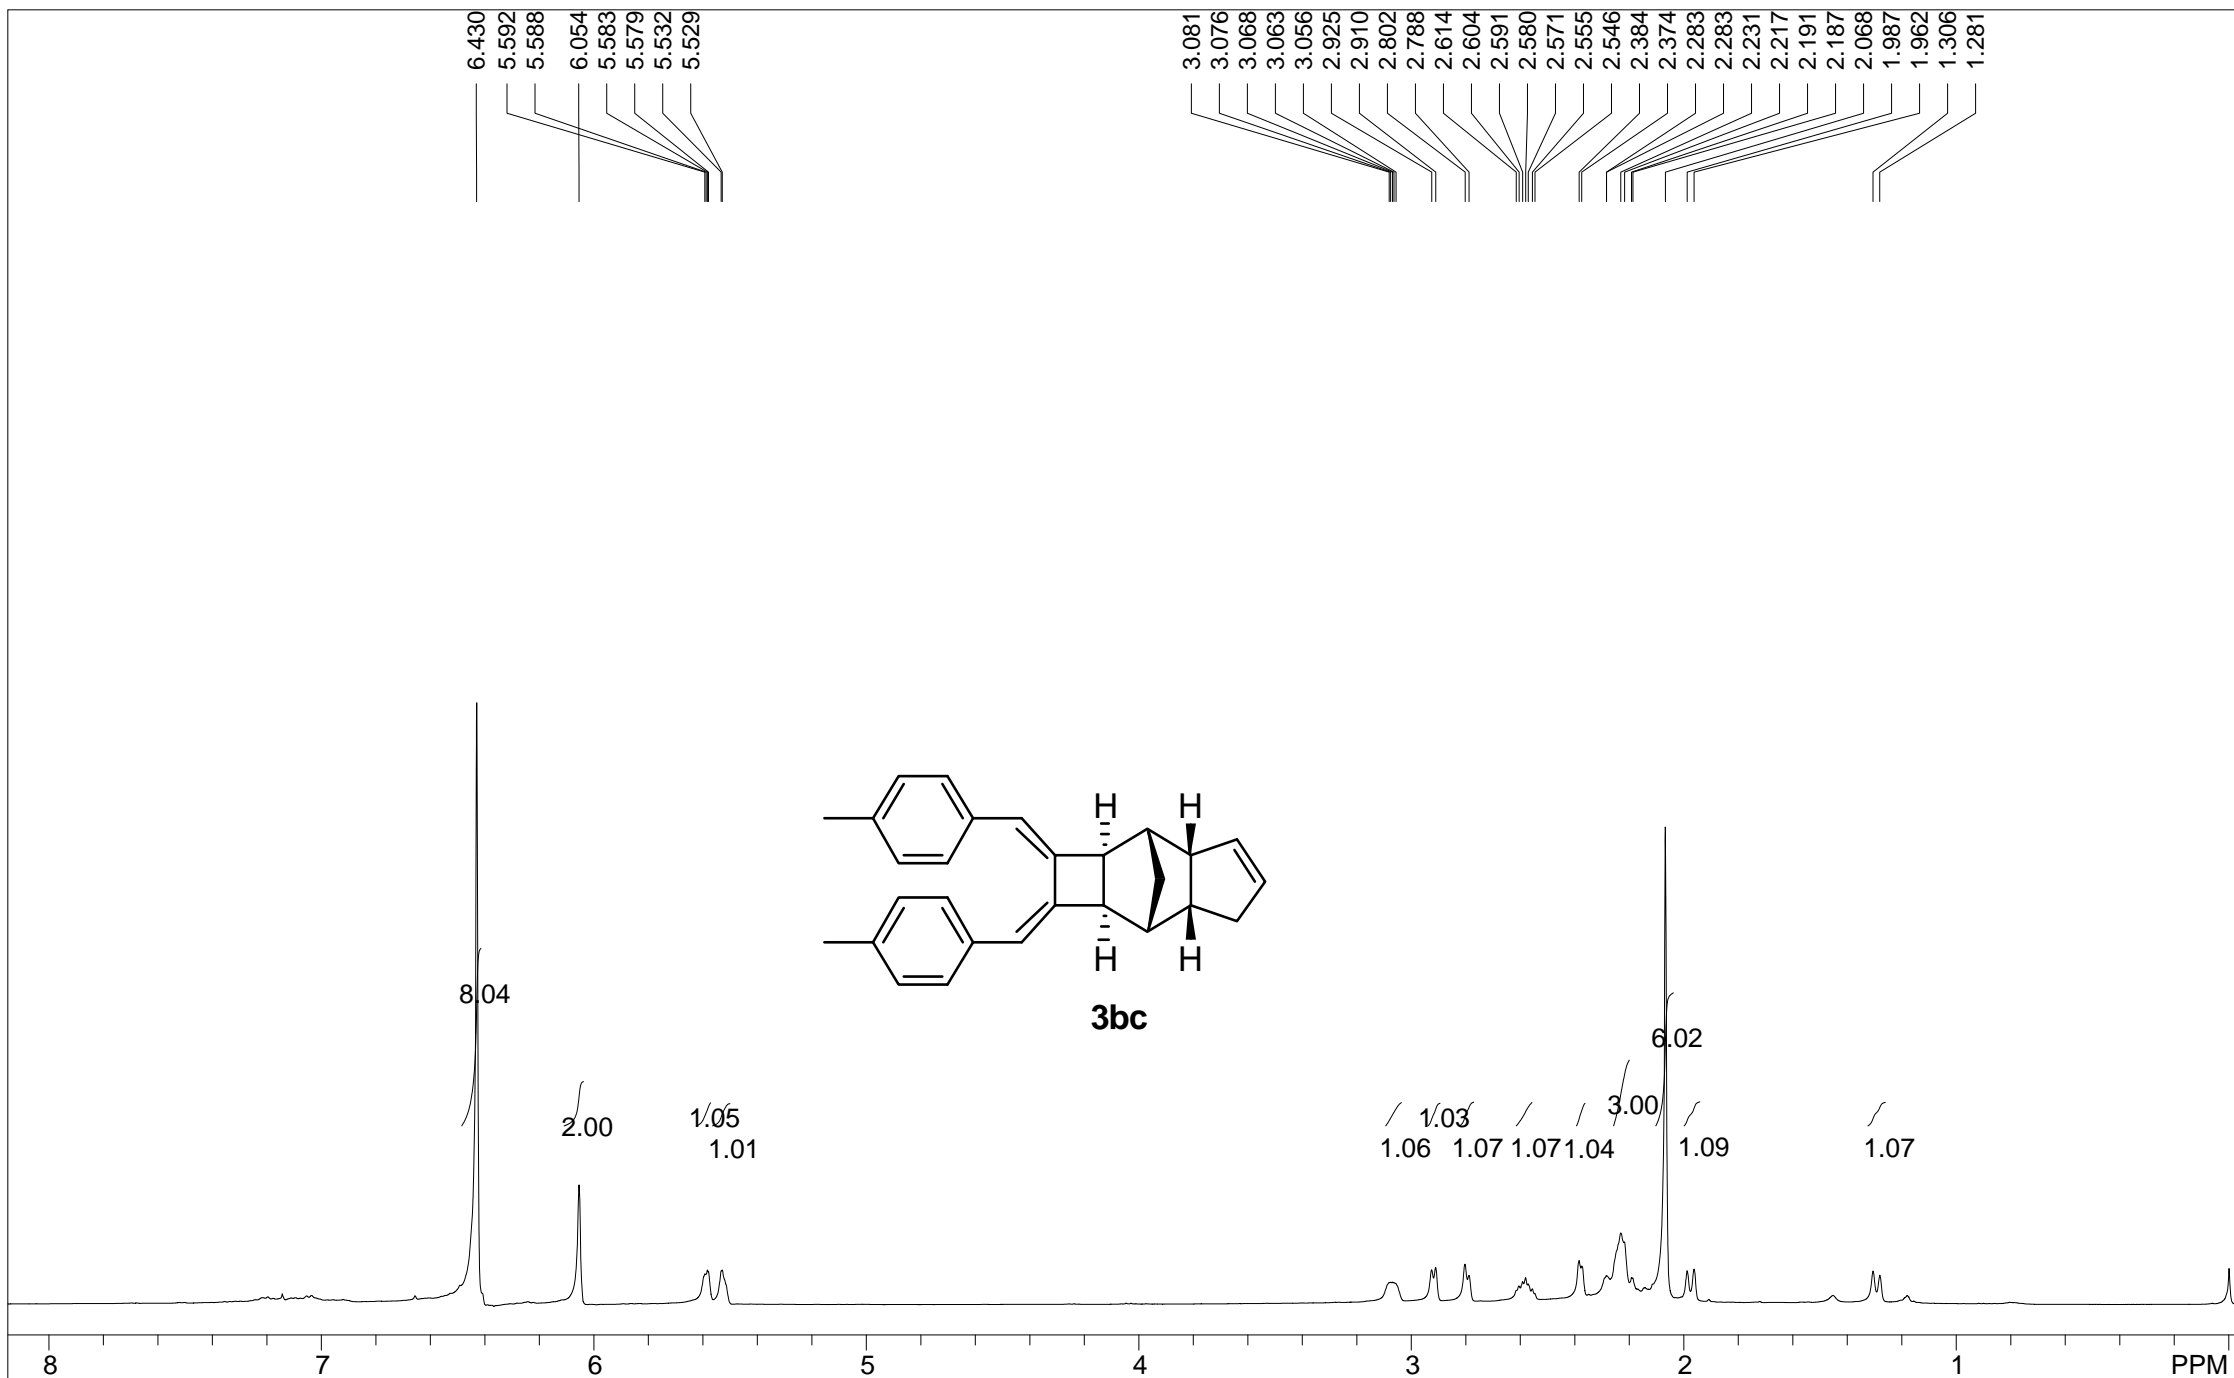

|                            |           |                                               |             |             |         |                |
|----------------------------|-----------|-----------------------------------------------|-------------|-------------|---------|----------------|
| spect. CDCl <sub>3</sub> . |           | USER: nmrsu -- DATE: Tue Oct 07 08:48:46 2014 |             |             |         |                |
| F1: 400.132                | F2: 1.000 | SW1: 8013                                     |             | OF1: 2414.5 |         | PTS1d: 65536   |
| EX: zg30                   |           | PW: 9.8 usec                                  | PD: 1.0 sec | NA: 16      | LB: 0.0 | Nuts - \$pdata |

142.148  
141.637  
134.680  
134.654  
134.015  
130.538  
126.695  
126.682  
126.040  
121.651  
121.460

76.305  
75.988  
75.670

51.858  
44.057  
43.990  
42.262  
41.152  
41.129  
34.541  
30.690  
20.008

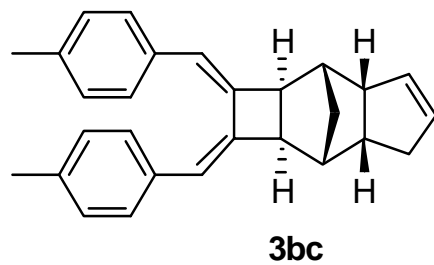

160 140 120 100 80 60 40 20 PPM

spect, CDC13,

USER: nmrsu -- DATE: Fri Jun 13 18:53:14 2014

F1: 100.623

F2: 1.000

SW1: 24039

OF1: 9957.0

PTS1d: 32768

EX: zgdc30

PW: 9.5 usec

PD: 1.2 sec

NA: 512

LB: 0.0

Nuts - \$pdata

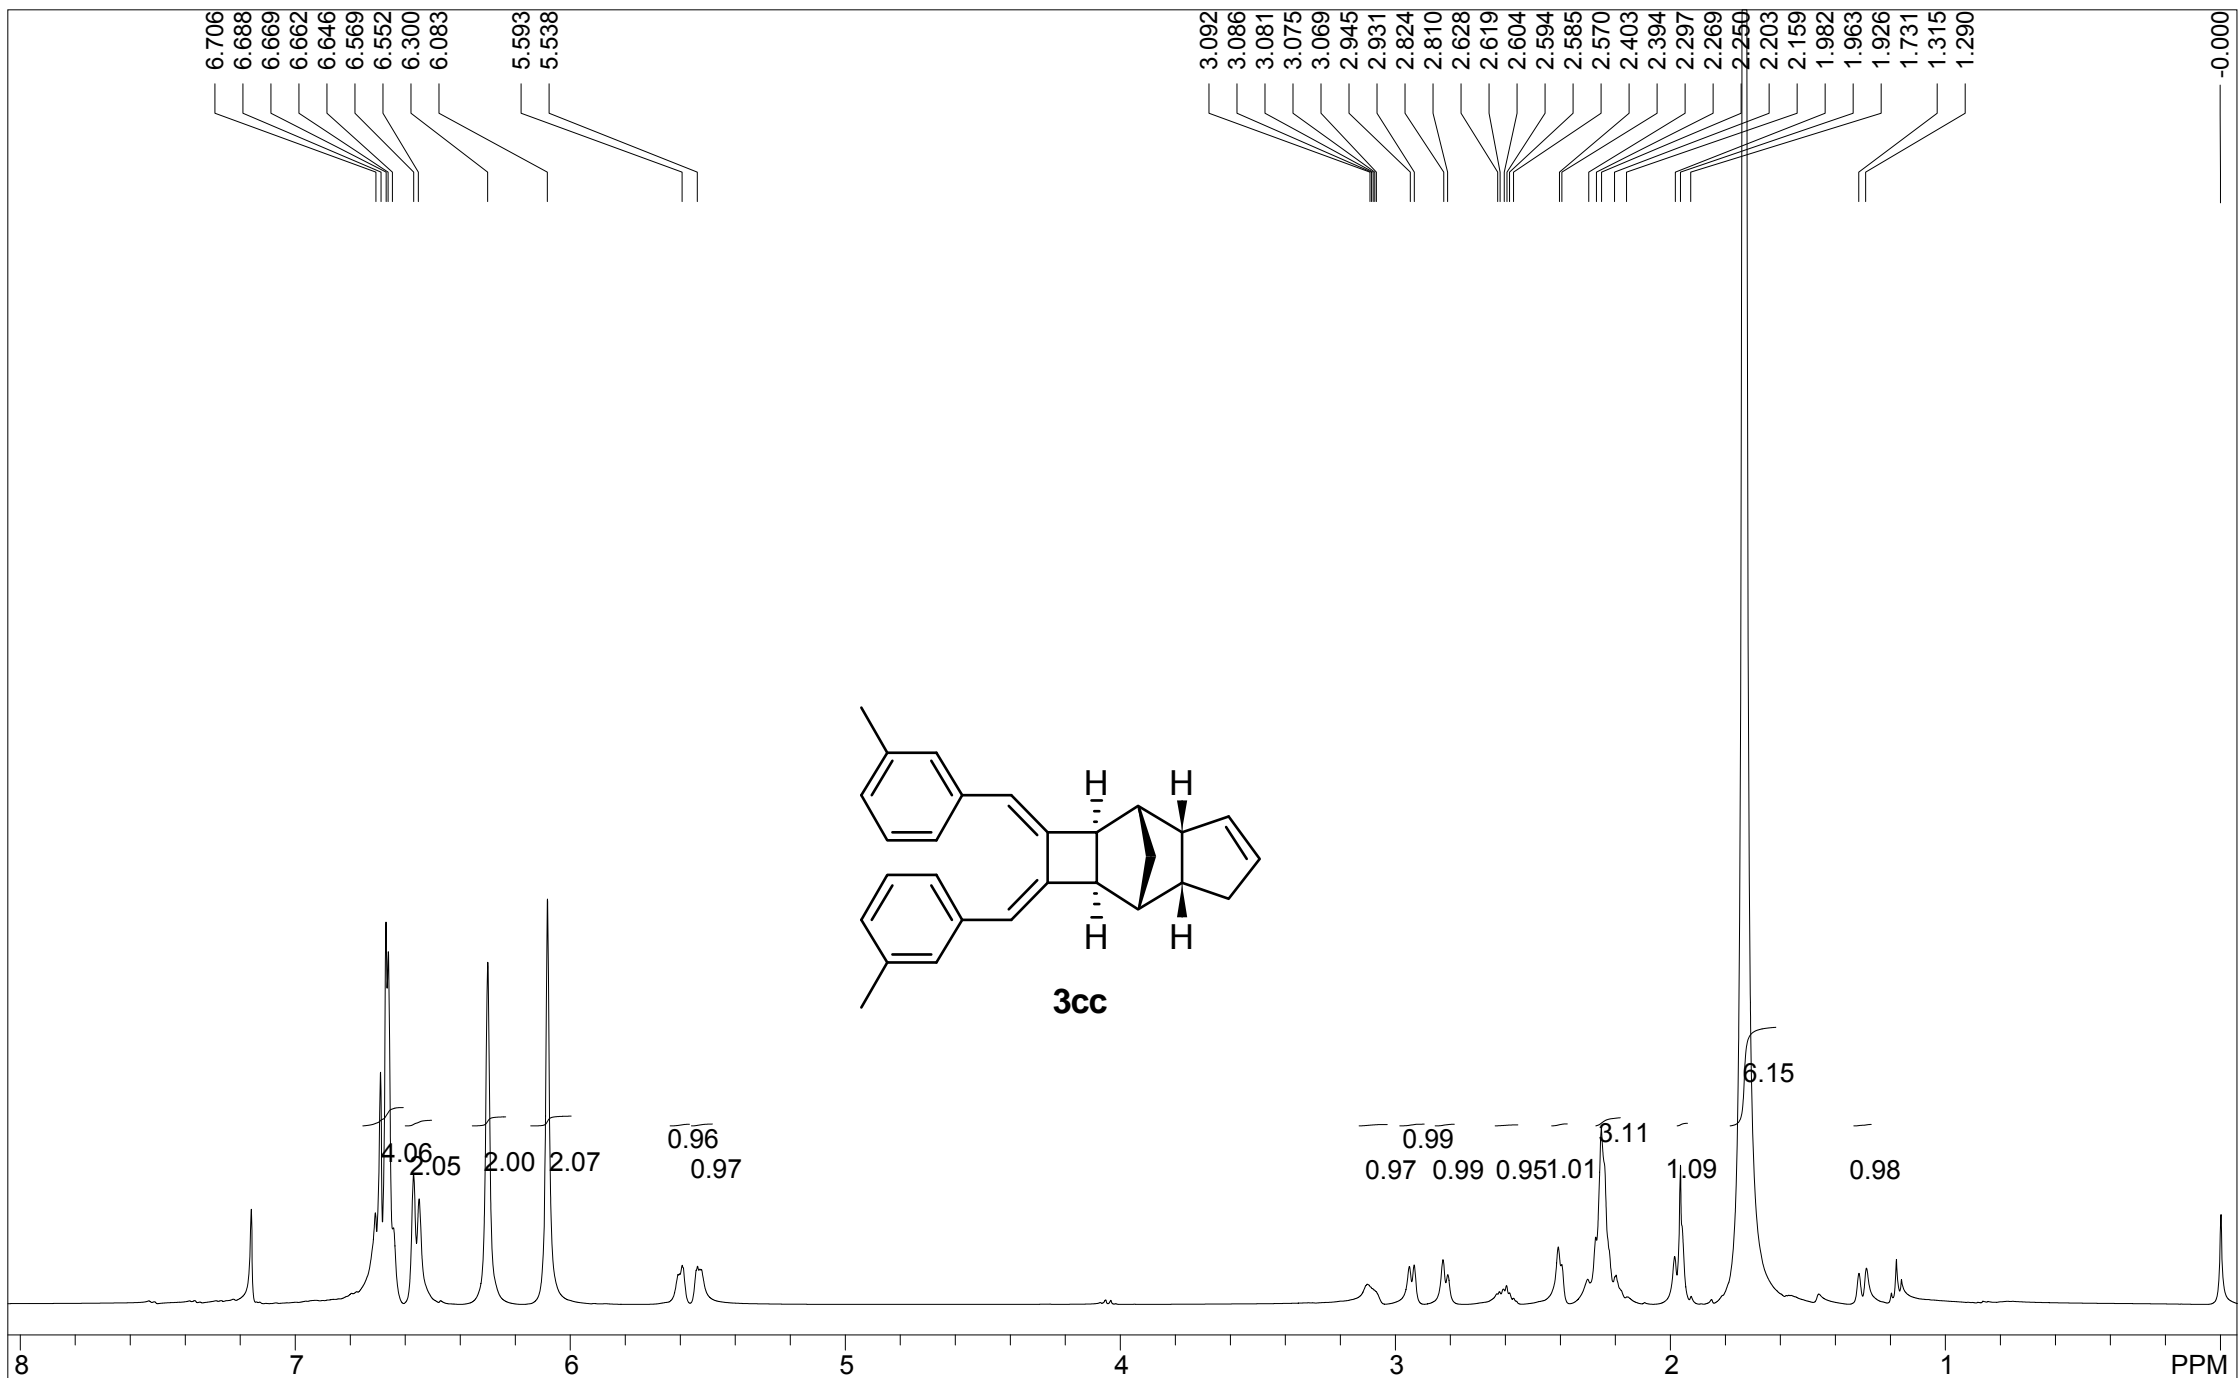

|                            |              |                                               |                |
|----------------------------|--------------|-----------------------------------------------|----------------|
| spect. CDCl <sub>3</sub> . |              | USER: nmrsu -- DATE: Wed Oct 08 09:30:43 2014 |                |
| F1: 400.132                | F2: 1.000    | SW1: 8013                                     | OF1: 2421.3    |
| EX: zg30                   | PW: 9.8 usec | PD: 1.0 sec                                   | NA: 64         |
|                            |              | LB: 0.0                                       | PTS1d: 65536   |
|                            |              |                                               | Nuts - \$pdata |



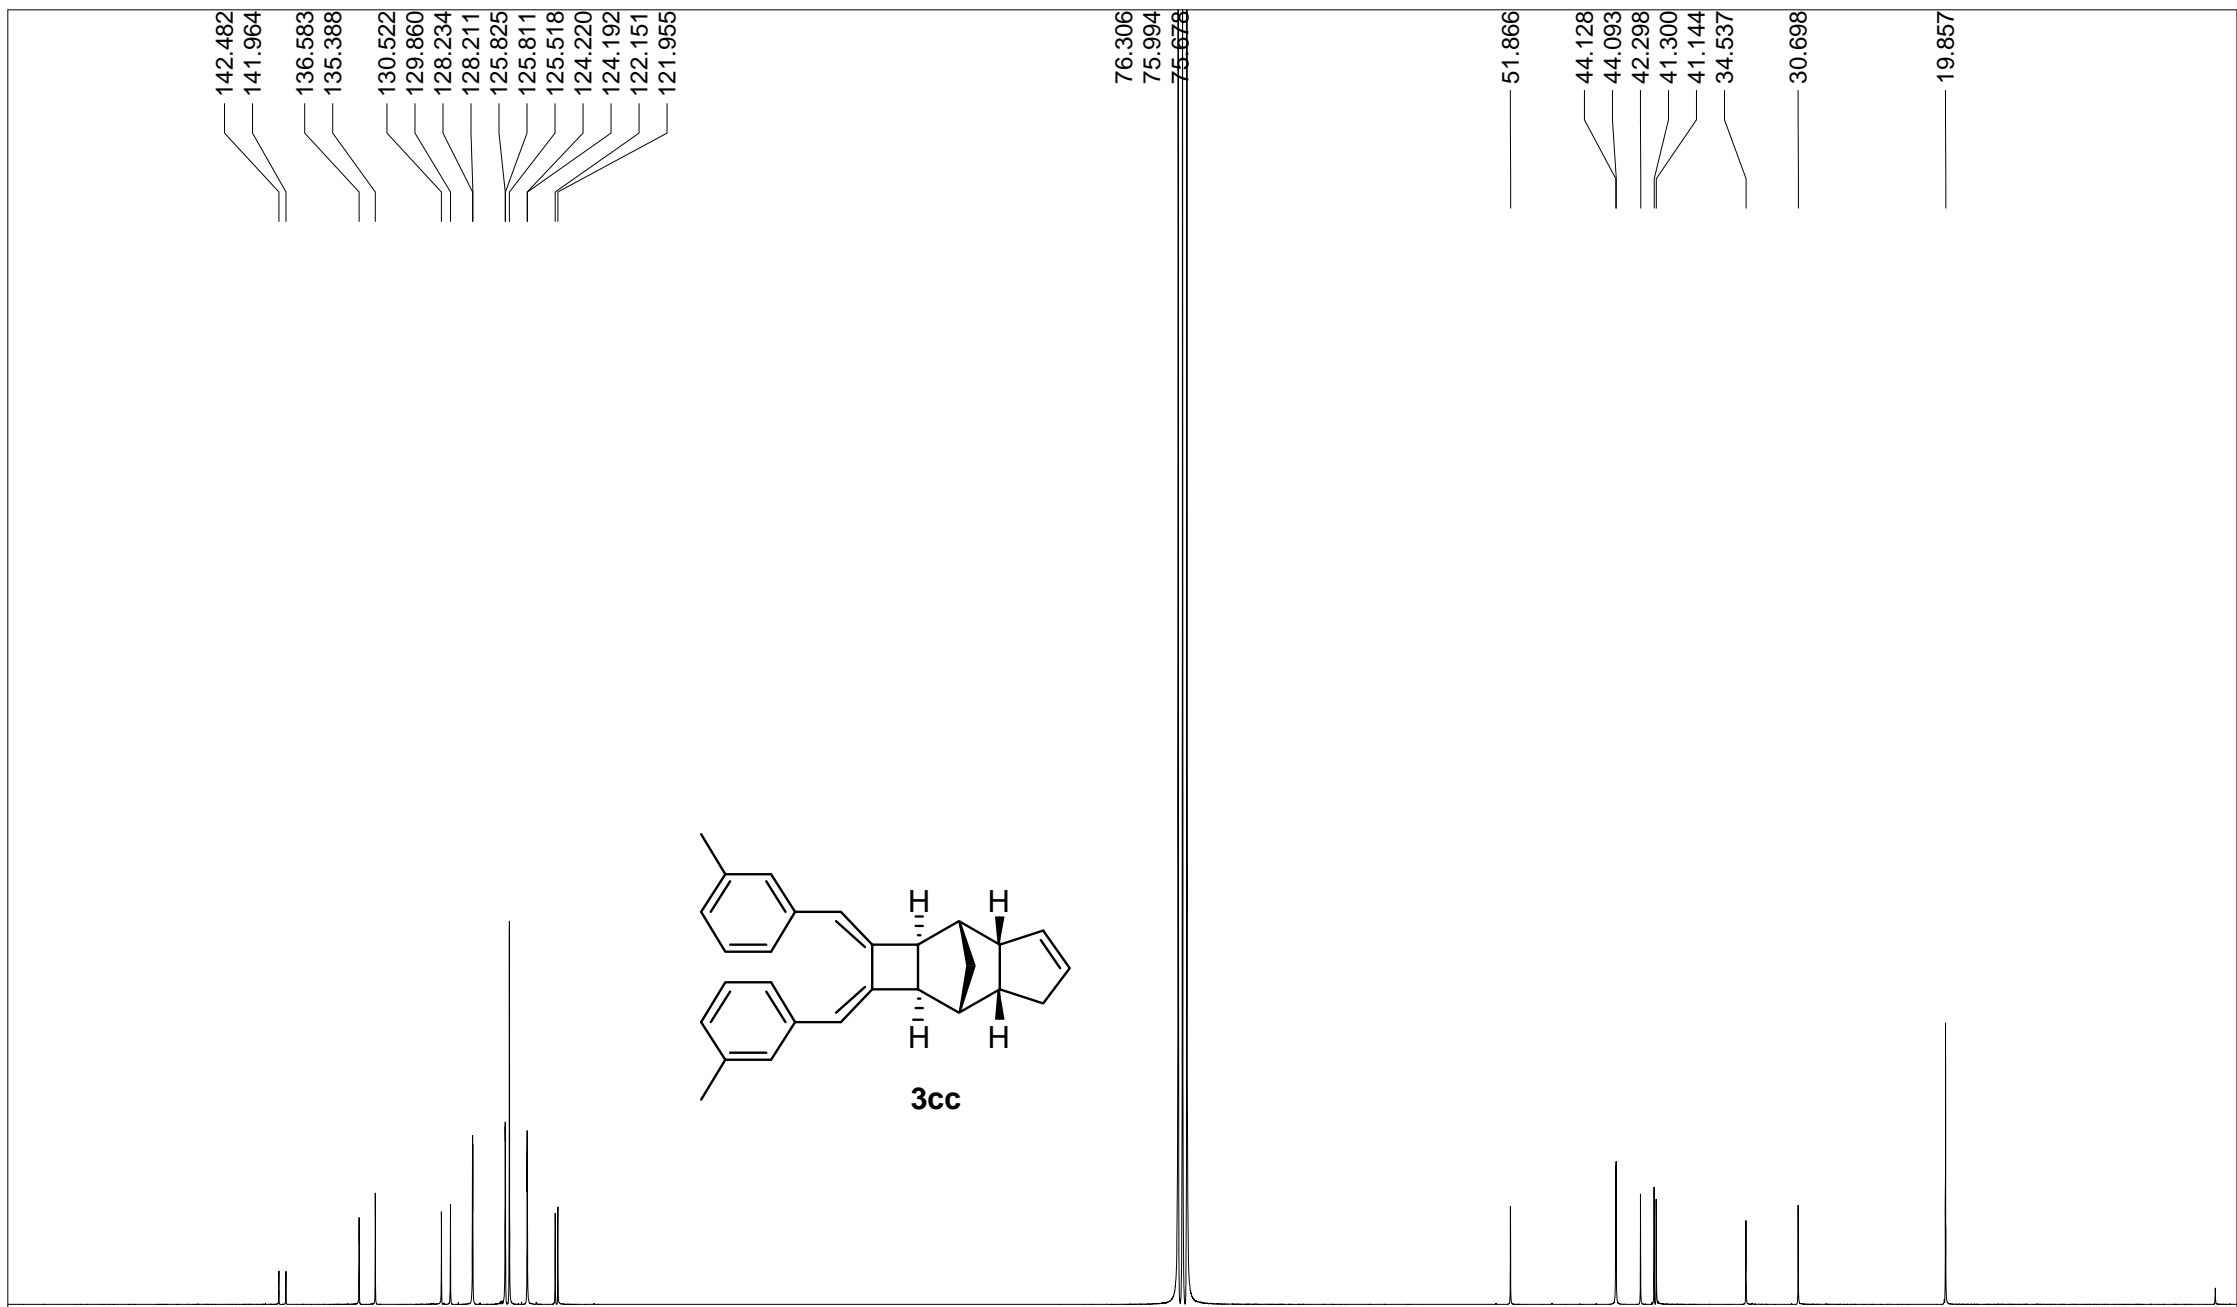

142.482  
141.964  
136.583  
135.388  
130.522  
129.860  
128.234  
128.211  
125.825  
125.811  
125.518  
124.220  
124.192  
122.151  
121.955

76.306  
75.994  
75.678

51.866  
44.128  
44.093  
42.298  
41.300  
41.144  
34.537  
30.698  
19.857

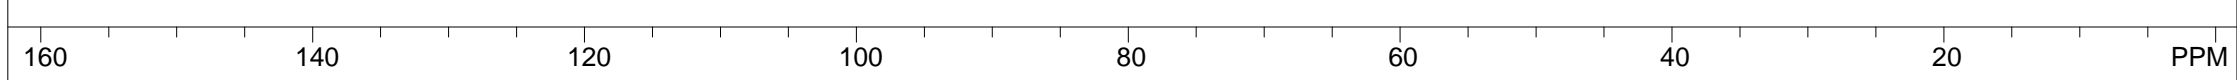

|               |           |                                               |             |             |                |  |
|---------------|-----------|-----------------------------------------------|-------------|-------------|----------------|--|
| spect, CDC13, |           | USER: nmrsu -- DATE: Fri Jun 13 19:49:04 2014 |             |             |                |  |
| F1: 100.623   | F2: 1.000 | SW1: 24038                                    |             | OF1: 9958.5 | PTS1d: 32768   |  |
| EX: zgdc30    |           | PW: 9.5 usec                                  | PD: 1.2 sec | NA: 1024    | LB: 0.0        |  |
|               |           |                                               |             |             | Nuts - \$pdata |  |

6.730  
6.709  
6.564  
6.543  
5.679  
6.116  
5.669  
5.665  
5.606  
5.602  
5.594

3.171  
3.165  
3.158  
3.152  
3.145  
3.010  
2.995  
2.890  
2.875  
2.706  
2.696  
2.684  
2.672  
2.660  
2.648  
2.637  
2.475  
2.465  
2.308  
2.282  
2.276  
2.006  
1.980  
1.416  
1.391

-0.001

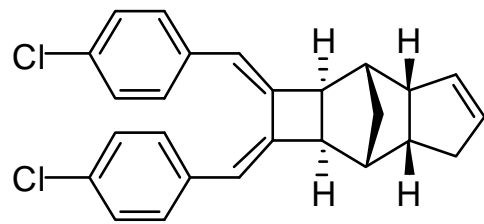

**3ec**

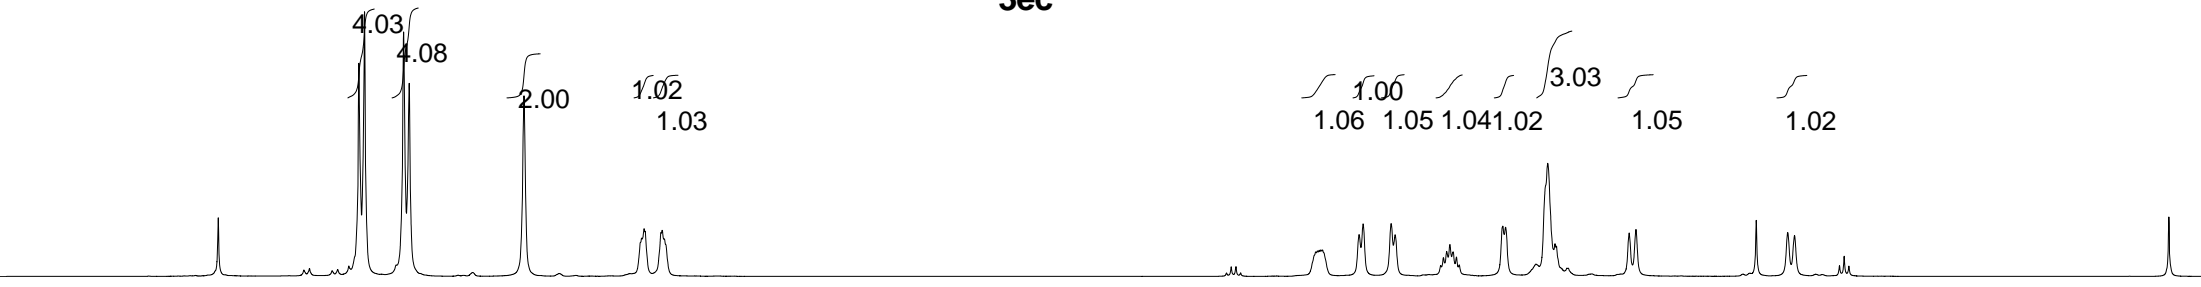

8 7 6 5 4 3 2 1 PPM

spect. CDCl<sub>3</sub>, USER: nmrsu -- DATE: Sat Mar 15 14:32:09 2014

|             |              |             |             |              |
|-------------|--------------|-------------|-------------|--------------|
| F1: 400.132 | F2: 1.000    | SW1: 8013   | OF1: 2458.6 | PTS1d: 65536 |
| EX: zg30    | PW: 9.8 usec | PD: 1.0 sec | NA: 16      | LB: 0.0      |

144.545  
144.009  
136.057  
132.319  
131.408  
130.987  
128.907  
128.886  
126.760  
121.954  
121.767  
77.338  
77.012  
76.702  
52.787  
45.159  
45.052  
43.270  
42.347  
42.093  
35.563  
31.702

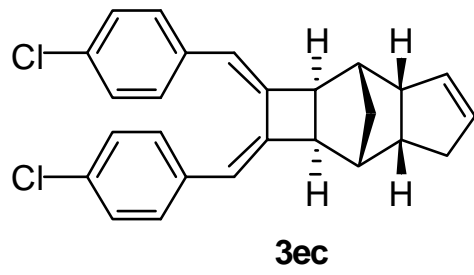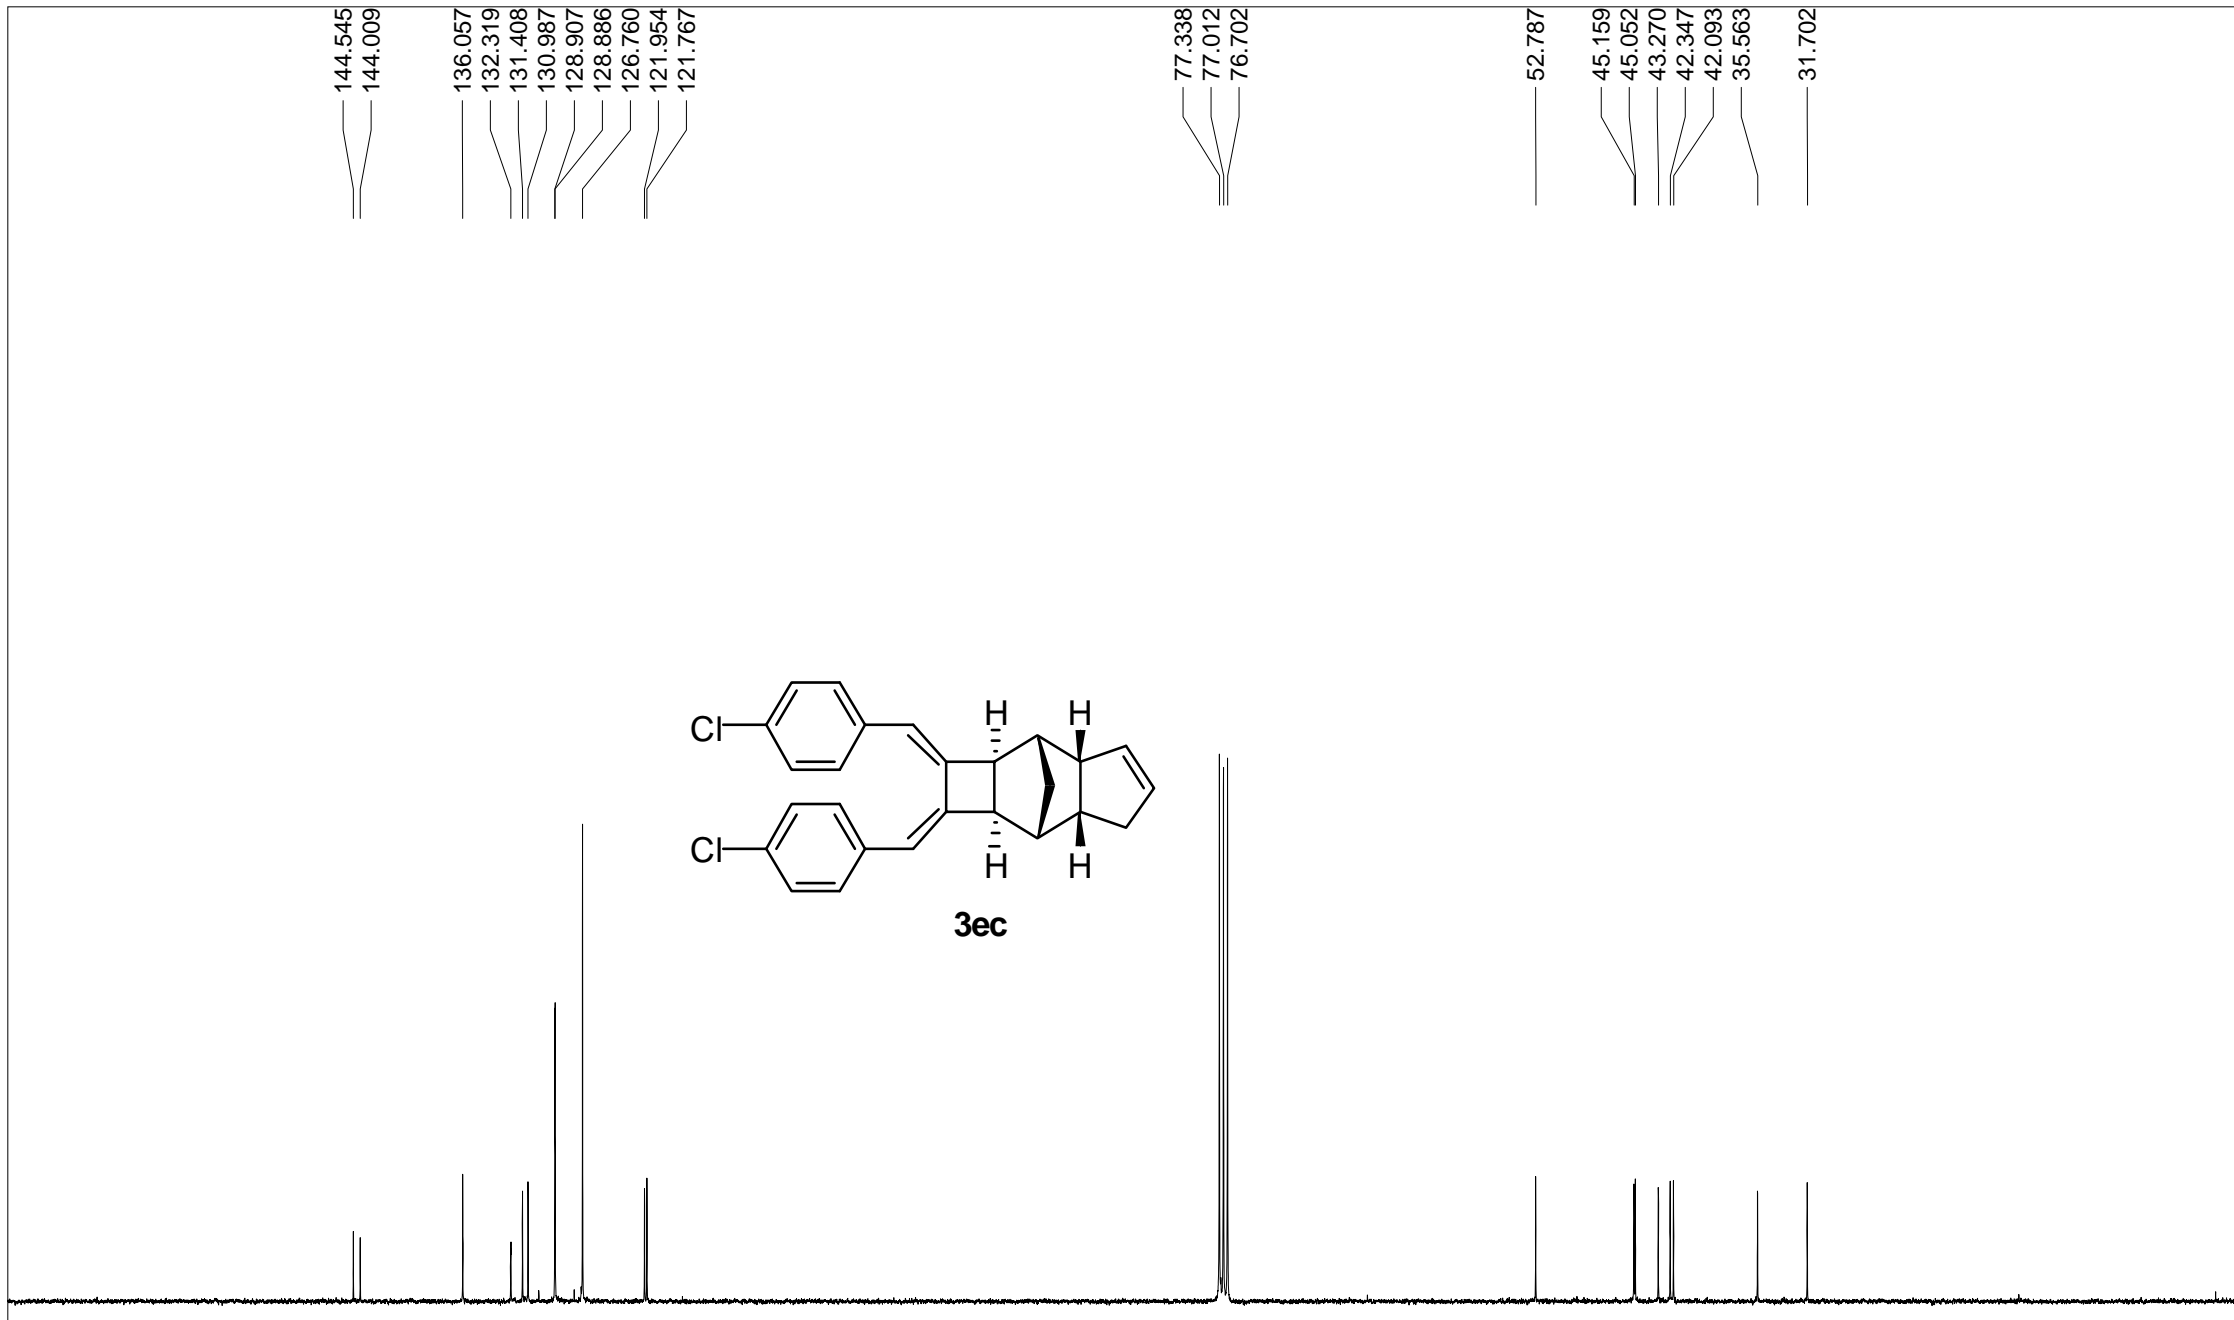

160

140

120

100

80

60

40

20

PPM

spect, CDC13,

USER: nmrsu -- DATE: Sat Mar 15 21:17:02 2014

F1: 100.623

F2: 1.000

SW1: 24038

OF1: 10062.5

PTS1d: 32768

EX: zgdc30

PW: 9.5 usec

PD: 1.2 sec

NA: 1024

LB: 0.0

Nuts - \$pdata

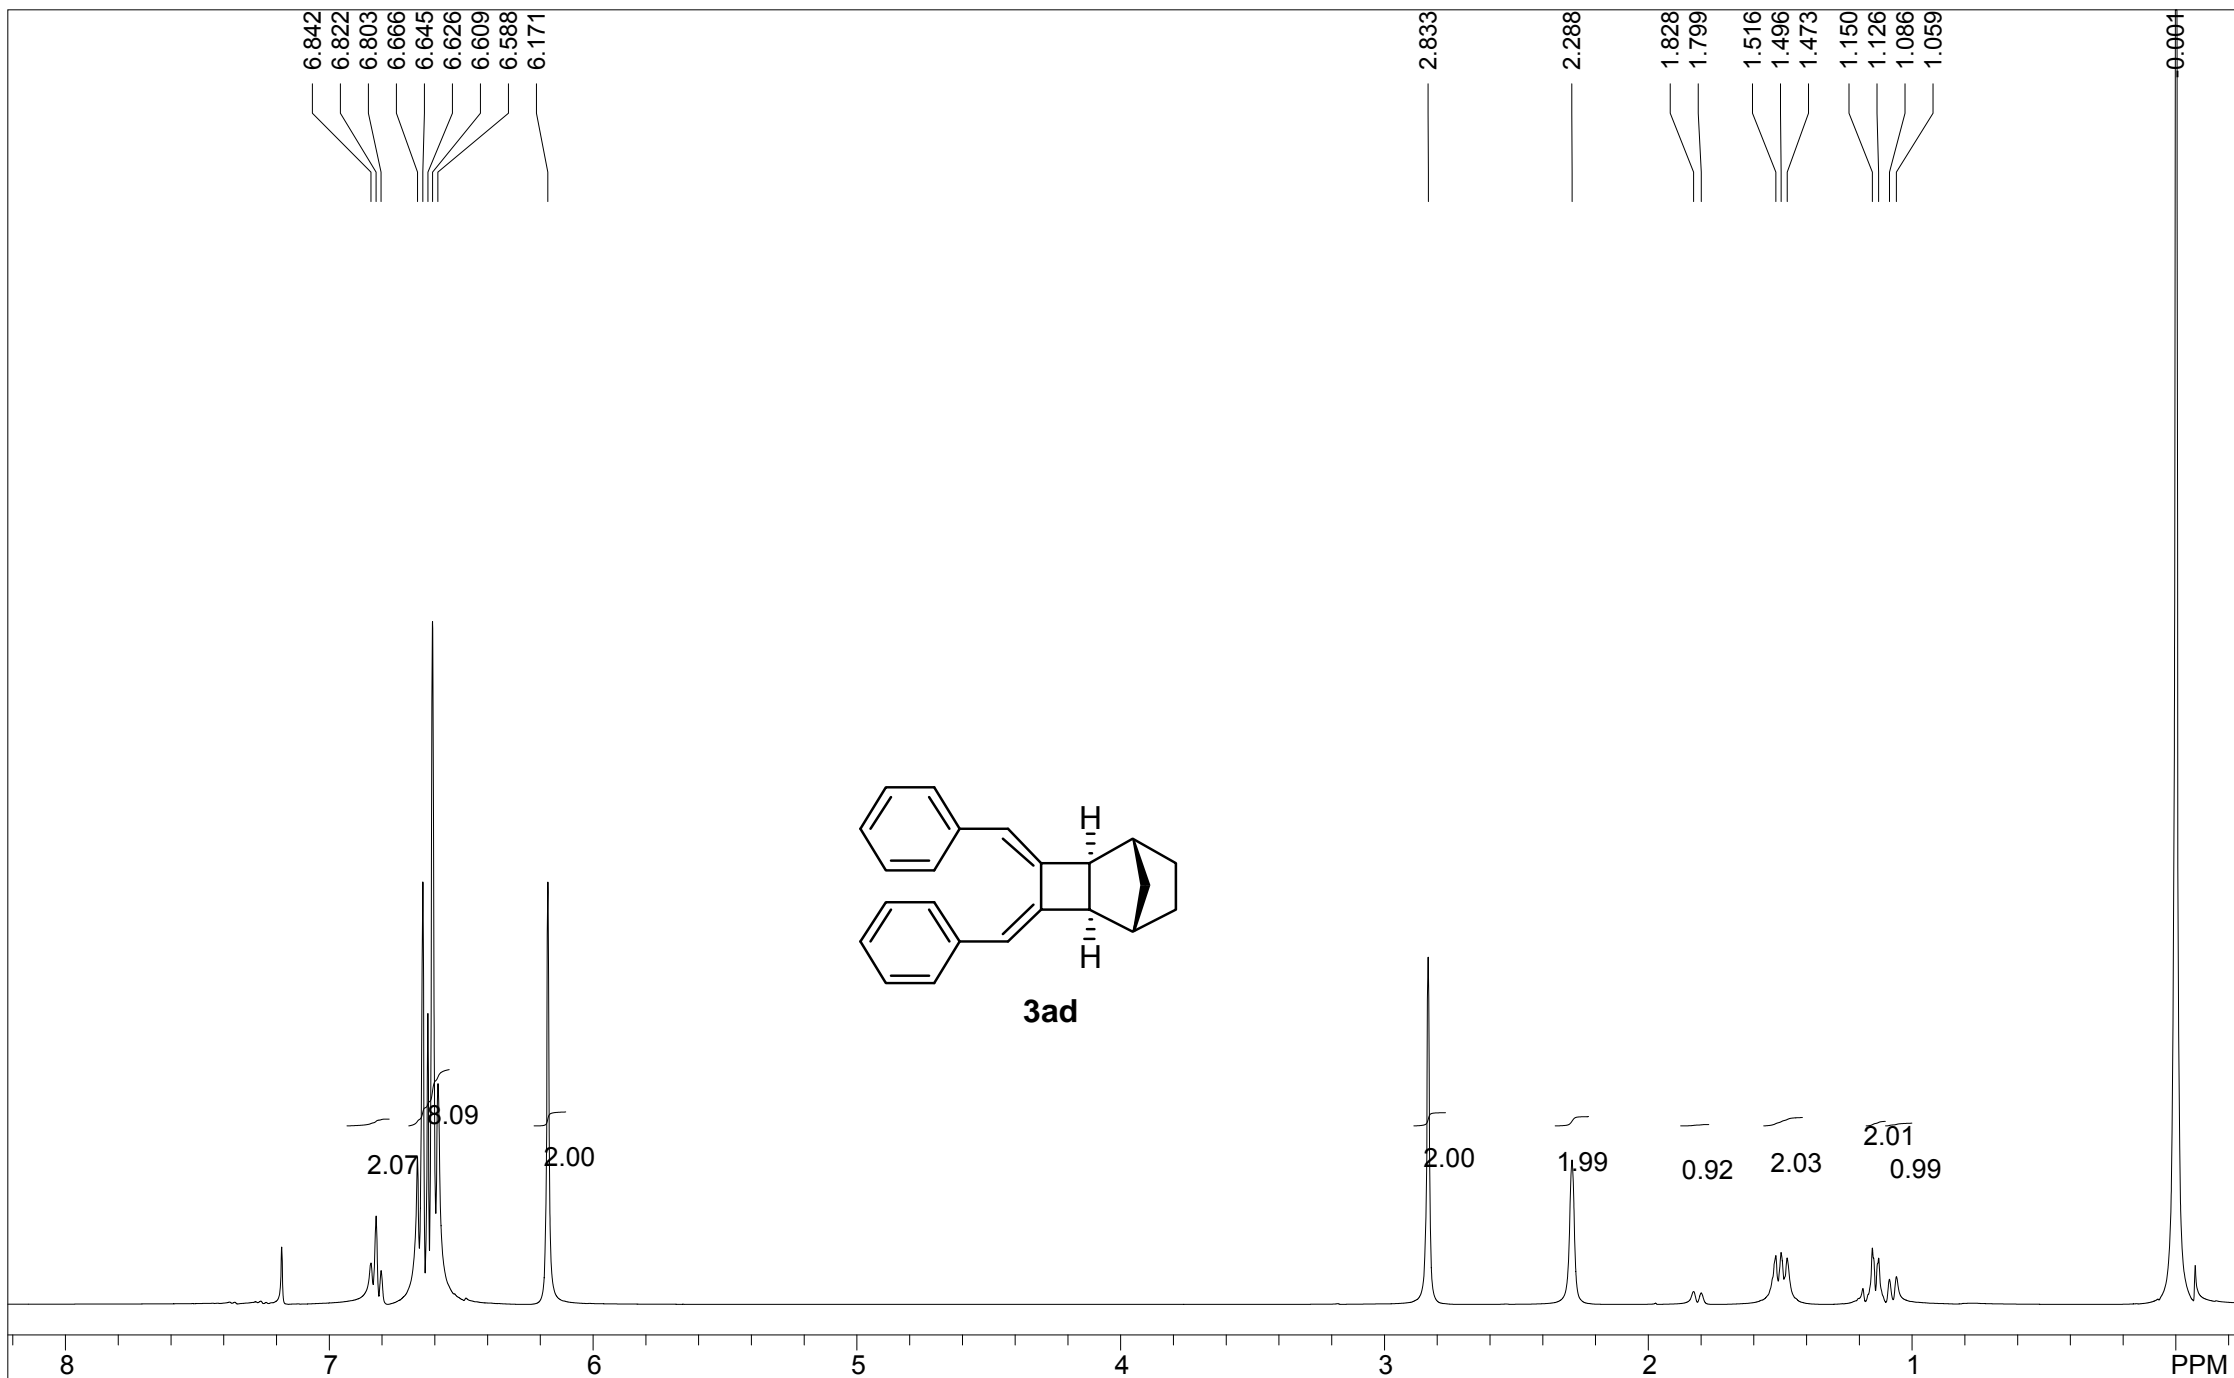

|                            |           |                                               |             |             |         |                |
|----------------------------|-----------|-----------------------------------------------|-------------|-------------|---------|----------------|
| spect, CDCl <sub>3</sub> , |           | USER: nmrsu -- DATE: Tue Jun 10 18:34:38 2014 |             |             |         |                |
| F1: 400.132                | F2: 1.000 | SW1: 8013                                     |             | OF1: 2429.1 |         | PTS1d: 65536   |
| EX: zg30                   |           | PW: 9.8 usec                                  | PD: 1.0 sec | NA: 16      | LB: 0.0 | Nuts - \$pdata |

142.105  
136.611  
126.862  
125.499  
125.036  
122.421

76.311  
75.983  
75.675

47.813

39.607

31.345

27.101

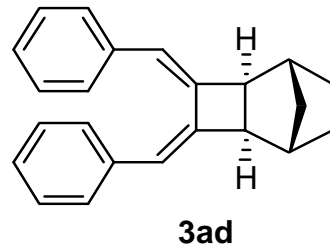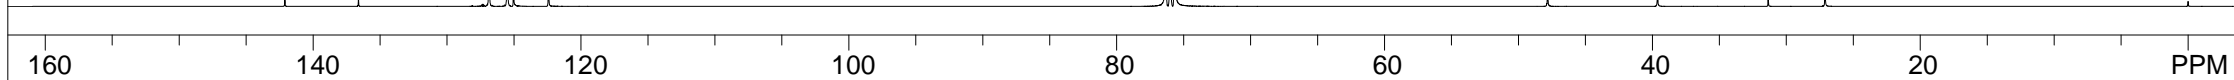

|               |           |                                               |             |             |         |              |                |
|---------------|-----------|-----------------------------------------------|-------------|-------------|---------|--------------|----------------|
| spect, CDC13, |           | USER: nmrsu -- DATE: Tue May 27 15:45:57 2014 |             |             |         |              |                |
| F1: 100.623   | F2: 1.000 | SW1: 24038                                    |             | OF1: 9957.6 |         | PTS1d: 32768 |                |
| EX: zgdc30    |           | PW: 9.5 usec                                  | PD: 1.2 sec | NA: 512     | LB: 0.0 |              | Nuts - \$pdata |

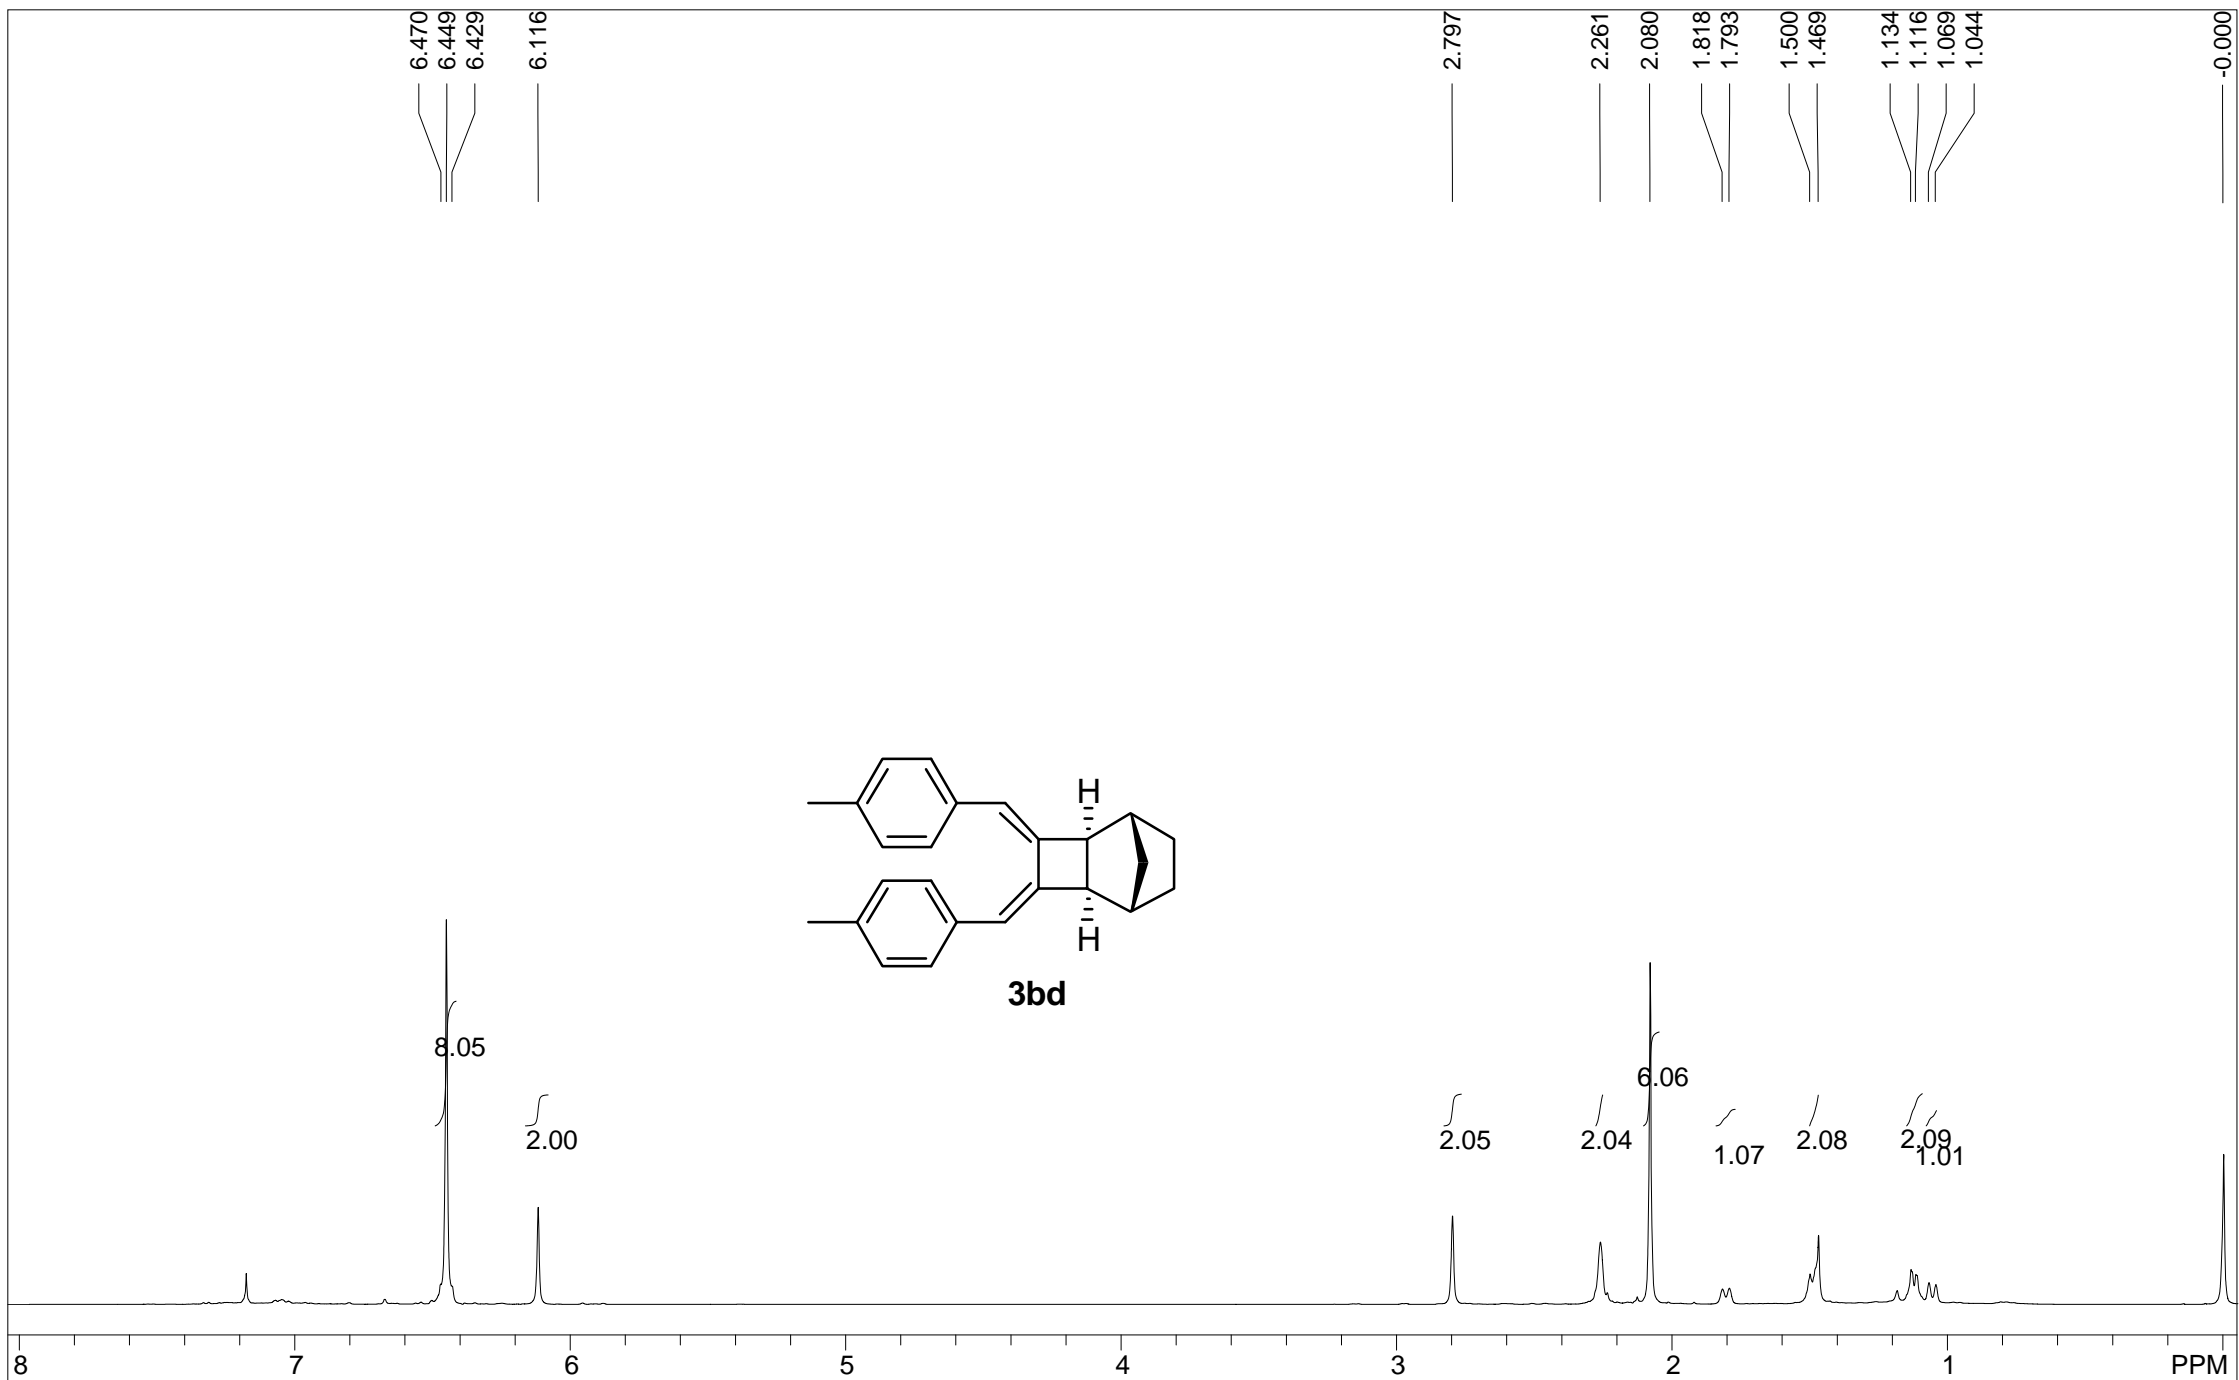

spect. CDCl<sub>3</sub>.

USER: nmrsu -- DATE: Tue Jun 10 12:50:55 2014

F1: 400.132 F2: 1.000

SW1: 8013

OF1: 2427.7

PTS1d: 65536

EX: zg30

PW: 9.8 usec

PD: 1.0 sec

NA: 16

LB: 0.0

Nuts - \$pdata

141.564  
134.760  
133.976  
126.729  
126.060  
121.964

76.313  
75.987  
75.678

47.700

39.581

31.320

27.127

20.021

0.012

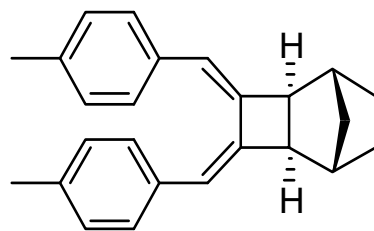

3bd

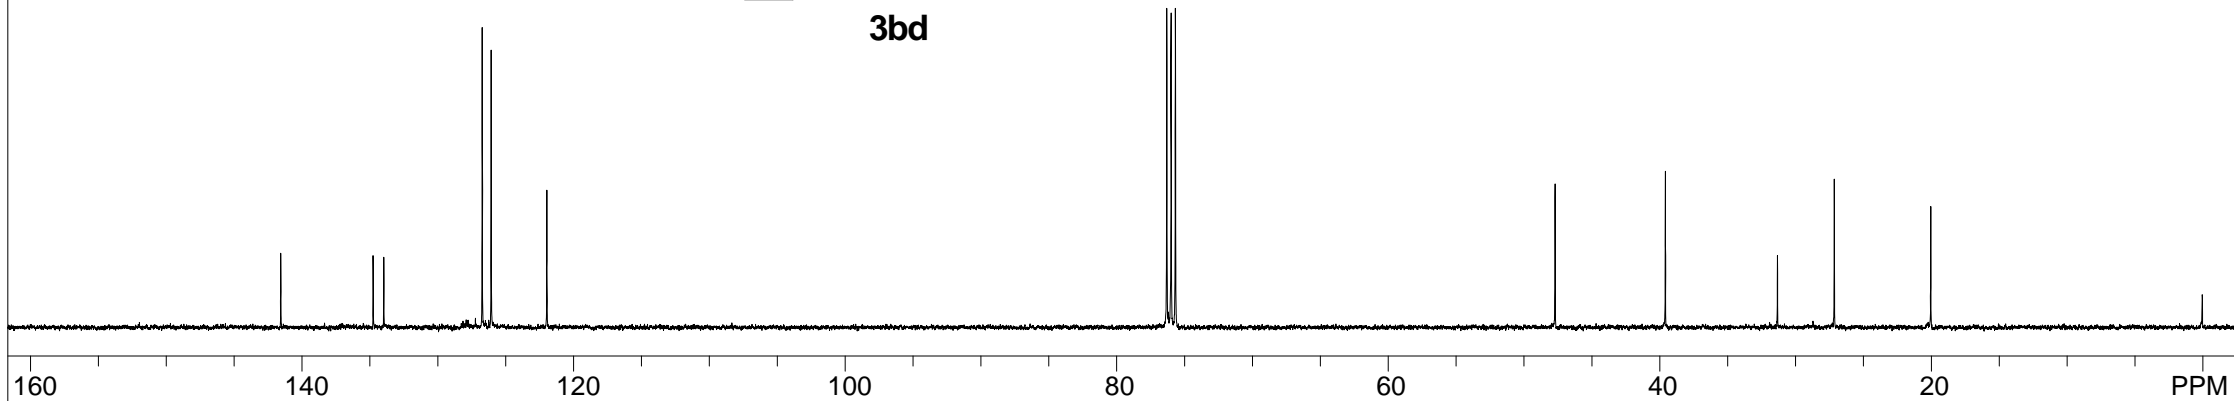

spect, CDC13,

USER: nmrsu -- DATE: Tue Jun 10 19:01:21 2014

F1: 100.623 F2: 1.000

SW1: 24038

OF1: 9958.7

PTS1d: 32768

EX: zgdc30

PW: 9.5 usec

PD: 1.2 sec

NA: 512

LB: 0.0

Nuts - \$pdata

6.724  
6.705  
6.687  
6.677  
6.659  
6.592  
6.574  
6.317  
6.146

2.820

2.282

1.815  
1.789  
1.739  
1.512  
1.492  
1.474  
1.147  
1.143  
1.129  
1.125  
1.078  
1.052

-0.000  
-0.070

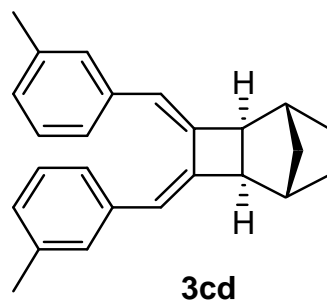

4.08  
2.06 2.03 2.00

2.06

2.03

6.06  
1.01 2.08

2.01  
1.05

8 7 6 5 4 3 2 1 PPM

spect. CDC13.

USER: nmrsu -- DATE: Thu Jun 12 20:00:36 2014

F1: 400.132 F2: 1.000

SW1: 8013

OF1: 2431.7

PTS1d: 65536

EX: zg30

PW: 9.8 usec

PD: 1.0 sec

NA: 64

LB: 0.0

Nuts - \$pdata



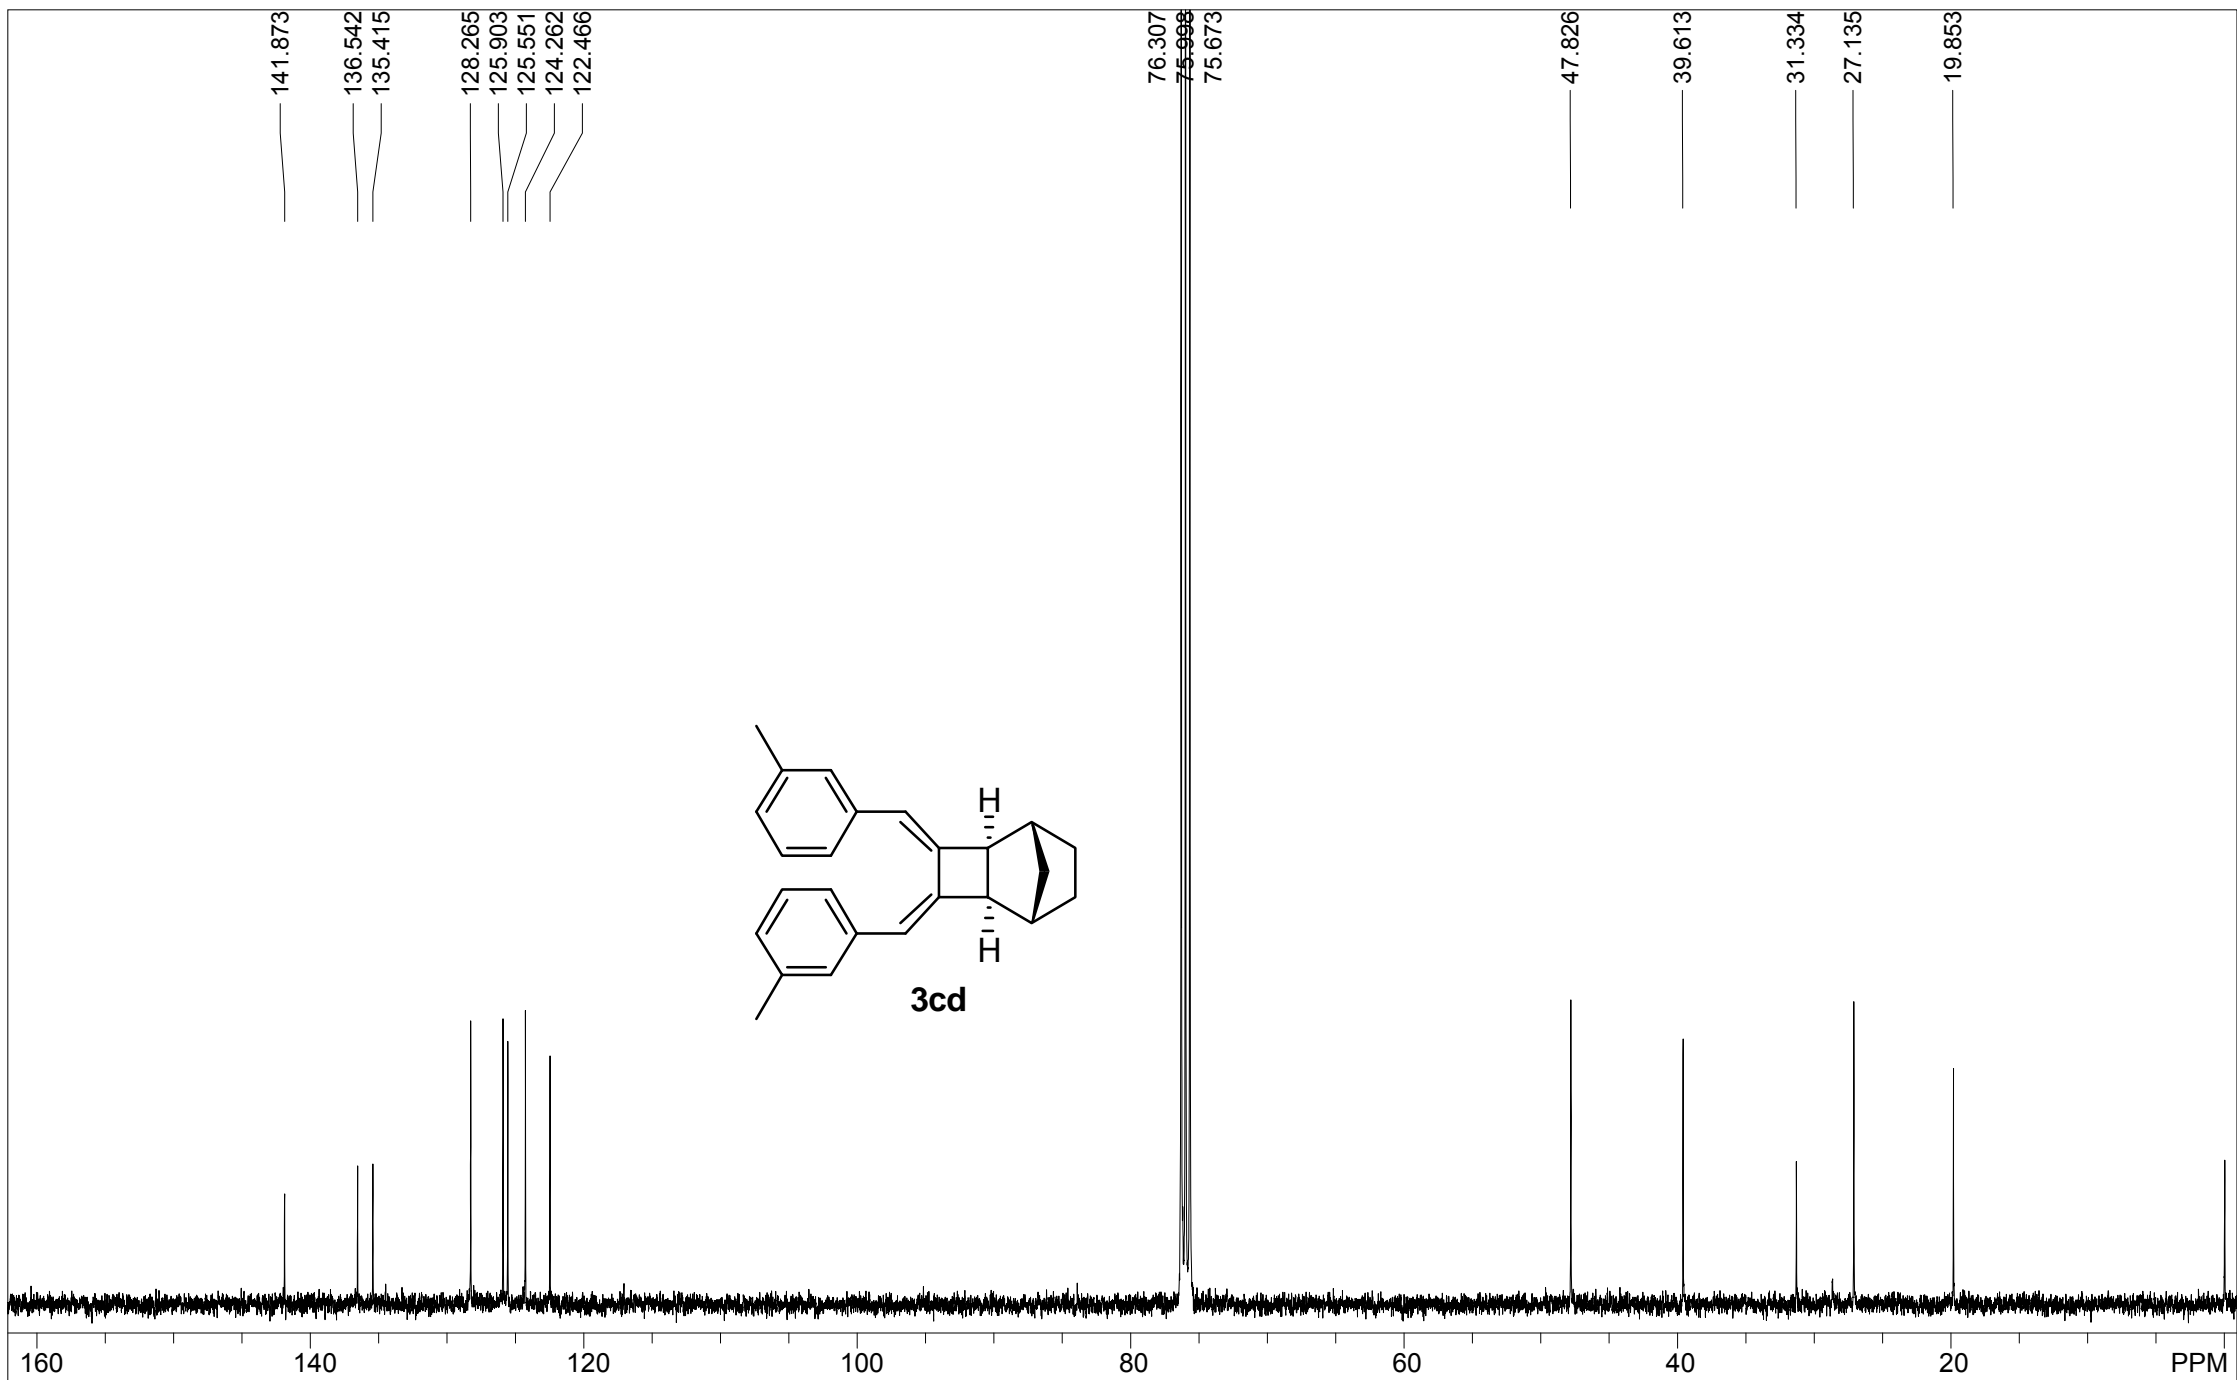

spect, CDCl<sub>3</sub>,

USER: nmrsu -- DATE: Thu Jun 12 20:46:31 2014

F1: 100.623 F2: 1.000

SW1: 24038

OF1: 9960.1

PTS1d: 32768

EX: zgdc30

PW: 9.5 usec

PD: 1.2 sec

NA: 1024

LB: 0.0

Nuts - \$pdata
